# Supplementary material for: Harms of introduced large herbivores outweigh their benefits, while both are greater on islands and for higher trophic levels
Source: Research Square preprint supplement (doi:10.21203/rs.3.rs-4959829/v1), 2024-08-29
Supplement: Supplementary file 1 [file 85e20e8e1c762f9b6807b4b8.xlsx]

## Sheet: Final analysed dataset 
Alien_species_name	Family	Order	R_ID	Report_year	Trophic_level	EICAT(+) impact magnitude	Impact magnitude	Confidence_score_ordered	Impact_mechanism	Mechanism_type	Continent	Location (Island = Yes, No)	Direction
Axis_axis	Cervidae	Cetartiodactyla	R_1	2013	Producers	MO	Strong	Low	Grazing/herbivory/browsing	Direct	Asia	Yes	Negative
Elephas_maximus	Elephantidae	Proboscidea	R_1	2013	Producers	MO	Strong	Low	Grazing/herbivory/browsing; Direct physical disturbance	Direct	Asia	Yes	Negative
Oreamnos_americanus	Bovidae	Cetartiodactyla	R_100	2013	Primary_consumers	MC	Weak	Medium	Transmission of diseases; Competition	Indirect	North and Central America	No	Negative
Sus_scrofa	Suidae	Cetartiodactyla	R_101	2002	Secondary_consumers	MN	Weak	Low	Predation	Direct	Oceania	Yes	Negative
Dama_dama	Cervidae	Cetartiodactyla	R_102	2006	Primary_consumers	MO	Strong	Medium	Competition	Indirect	Europe	No	Negative
Sus_scrofa	Suidae	Cetartiodactyla	R_103	2006	Secondary_consumers	MN	Weak	Low	Predation	Direct	Oceania	No	Negative
Rusa_unicolor	Cervidae	Cetartiodactyla	R_104	2018	Secondary_consumers	MN	Weak	Medium	(1) Provision of trophic resources	Direct	Oceania	No	Positive
Equus_asinus	Equidae	Perissodactyla	R_106	1984	Primary_consumers	MN	Weak	Low	Direct physical disturbance	Direct	North and Central America	No	Negative
Lama_guanicoe	Camelidae	Cetartiodactyla	R_107	2005	Producers	MO	Strong	Low	Grazing/herbivory/browsing	Direct	South America	Yes	Negative
Lama_guanicoe	Camelidae	Cetartiodactyla	R_107	2005	Producers	MO	Strong	Low	Grazing/herbivory/browsing	Direct	South America	Yes	Negative
Equus_caballus	Equidae	Perissodactyla	R_108	2011	Producers	MO	Strong	Low	Grazing/herbivory/browsing	Direct	North and Central America	Yes	Negative
Equus_caballus	Equidae	Perissodactyla	R_108	2011	Producers	MO	Strong	Low	Grazing/herbivory/browsing	Direct	North and Central America	Yes	Negative
Equus_caballus	Equidae	Perissodactyla	R_108	2011	Producers	MO	Strong	Low	Grazing/herbivory/browsing	Direct	North and Central America	Yes	Negative
Equus_caballus	Equidae	Perissodactyla	R_108	2011	Producers	MN	Weak	Low	(10) Indirect impacts through interactions with other taxa	Indirect	North_and_Central_America	Yes	Positive
Equus_caballus	Equidae	Perissodactyla	R_108	2011	Producers	MN	Weak	Low	(10) Indirect impacts through interactions with other taxa	Indirect	North_and_Central_America	Yes	Positive
Equus_caballus	Equidae	Perissodactyla	R_108	2011	Producers	MN	Weak	Medium	(10) Indirect impacts through interactions with other taxa	Indirect	North_and_Central_America	Yes	Positive
Equus_caballus	Equidae	Perissodactyla	R_108	2011	Producers	MN	Weak	Low	(10) Indirect impacts through interactions with other taxa	Indirect	North_and_Central_America	Yes	Positive
Equus_caballus	Equidae	Perissodactyla	R_108	2011	Producers	MN	Weak	Low	(10) Indirect impacts through interactions with other taxa	Indirect	North_and_Central_America	Yes	Positive
Bubalus_bubalis	Bovidae	Cetartiodactyla	R_109	1984	Secondary_consumers	MO	Strong	Low	Chemical, physical or structural impact on ecosystems	Indirect	Oceania	No	Negative
Bubalus_bubalis	Bovidae	Cetartiodactyla	R_109	1984	Primary_consumers	MO	Strong	Low	Chemical, physical or structural impact on ecosystems	Indirect	Oceania	No	Negative
Bubalus_bubalis	Bovidae	Cetartiodactyla	R_109	1984	Secondary_consumers	MO	Strong	Low	Chemical, physical or structural impact on ecosystems	Indirect	Oceania	No	Negative
Bubalus_bubalis	Bovidae	Cetartiodactyla	R_109	1984	Secondary_consumers	MO	Strong	Low	Chemical, physical or structural impact on ecosystems	Indirect	Oceania	No	Negative
Bubalus_bubalis	Bovidae	Cetartiodactyla	R_109	1984	Secondary_consumers	MO	Strong	Low	Chemical, physical or structural impact on ecosystems	Indirect	Oceania	No	Negative
Bubalus_bubalis	Bovidae	Cetartiodactyla	R_109	1984	Primary_consumers	MO	Strong	Low	Chemical, physical or structural impact on ecosystems	Indirect	Oceania	No	Negative
Bubalus_bubalis	Bovidae	Cetartiodactyla	R_109	1984	Secondary_consumers	MO	Strong	Low	Chemical, physical or structural impact on ecosystems	Indirect	Oceania	No	Negative
Bubalus_bubalis	Bovidae	Cetartiodactyla	R_109	1984	Secondary_consumers	MO	Strong	Low	Chemical, physical or structural impact on ecosystems	Indirect	Oceania	No	Negative
Bubalus_bubalis	Bovidae	Cetartiodactyla	R_109	1984	Primary_consumers	MO	Strong	Low	Chemical, physical or structural impact on ecosystems	Indirect	Oceania	No	Negative
Bubalus_bubalis	Bovidae	Cetartiodactyla	R_109	1984	Secondary_consumers	MO	Strong	Low	Chemical, physical or structural impact on ecosystems	Indirect	Oceania	No	Negative
Bubalus_bubalis	Bovidae	Cetartiodactyla	R_109	1984	Secondary_consumers	MO	Strong	Low	Chemical, physical or structural impact on ecosystems	Indirect	Oceania	No	Negative
Bubalus_bubalis	Bovidae	Cetartiodactyla	R_109	1984	Secondary_consumers	MO	Strong	Low	Chemical, physical or structural impact on ecosystems	Indirect	Oceania	No	Negative
Bubalus_bubalis	Bovidae	Cetartiodactyla	R_109	1984	Secondary_consumers	MO	Strong	Low	Chemical, physical or structural impact on ecosystems	Indirect	Oceania	No	Negative
Bubalus_bubalis	Bovidae	Cetartiodactyla	R_109	1984	Secondary_consumers	MO	Strong	Low	Chemical, physical or structural impact on ecosystems	Indirect	Oceania	No	Negative
Bubalus_bubalis	Bovidae	Cetartiodactyla	R_109	1984	Secondary_consumers	MO	Strong	Low	Chemical, physical or structural impact on ecosystems	Indirect	Oceania	No	Negative
Bubalus_bubalis	Bovidae	Cetartiodactyla	R_109	1984	Secondary_consumers	MO	Strong	Low	Chemical, physical or structural impact on ecosystems	Indirect	Oceania	No	Negative
Bubalus_bubalis	Bovidae	Cetartiodactyla	R_109	1984	Primary_consumers	MO	Strong	Low	Chemical, physical or structural impact on ecosystems	Indirect	Oceania	No	Negative
Bubalus_bubalis	Bovidae	Cetartiodactyla	R_109	1984	Secondary_consumers	MO	Strong	Low	Chemical, physical or structural impact on ecosystems	Indirect	Oceania	No	Negative
Bubalus_bubalis	Bovidae	Cetartiodactyla	R_109	1984	Secondary_consumers	MO	Strong	Low	Chemical, physical or structural impact on ecosystems	Indirect	Oceania	No	Negative
Bubalus_bubalis	Bovidae	Cetartiodactyla	R_109	1984	Primary_consumers	MO	Strong	Low	Chemical, physical or structural impact on ecosystems	Indirect	Oceania	No	Negative
Bubalus_bubalis	Bovidae	Cetartiodactyla	R_109	1984	Secondary_consumers	MO	Strong	Low	Chemical, physical or structural impact on ecosystems	Indirect	Oceania	No	Negative
Bubalus_bubalis	Bovidae	Cetartiodactyla	R_109	1984	Primary_consumers	MO	Strong	Low	Chemical, physical or structural impact on ecosystems	Indirect	Oceania	No	Negative
Bubalus_bubalis	Bovidae	Cetartiodactyla	R_109	1984	Primary_consumers	MO	Strong	Low	Chemical, physical or structural impact on ecosystems	Indirect	Oceania	No	Negative
Bubalus_bubalis	Bovidae	Cetartiodactyla	R_109	1984	Primary_consumers	MO	Strong	Low	Chemical, physical or structural impact on ecosystems	Indirect	Oceania	No	Negative
Bubalus_bubalis	Bovidae	Cetartiodactyla	R_109	1984	Secondary_consumers	MO	Strong	Low	Chemical, physical or structural impact on ecosystems	Indirect	Oceania	No	Negative
Bubalus_bubalis	Bovidae	Cetartiodactyla	R_109	1984	Primary_consumers	MO	Strong	Low	Chemical, physical or structural impact on ecosystems	Indirect	Oceania	No	Negative
Bubalus_bubalis	Bovidae	Cetartiodactyla	R_109	1984	Primary_consumers	MO	Strong	Low	Chemical, physical or structural impact on ecosystems	Indirect	Oceania	No	Negative
Bos_taurus	Bovidae	Cetartiodactyla	R_11	1943	Producers	MO	Strong	Medium	Grazing/herbivory/browsing	Direct	North and Central America	Yes	Negative
Bubalus_bubalis	Bovidae	Cetartiodactyla	R_110	1988	Secondary_consumers	MO	Strong	Low	Chemical, physical or structural impact on ecosystems	Indirect	Oceania	No	Negative
Dama_dama	Cervidae	Cetartiodactyla	R_111	2001	Secondary_consumers	MO	Strong	Medium	Chemical, physical or structural impact on ecosystems	Indirect	Europe	Yes	Negative
Muntiacus_reevesi	Cervidae	Cetartiodactyla	R_111	2001	Secondary_consumers	MO	Strong	Medium	Chemical, physical or structural impact on ecosystems	Indirect	Europe	Yes	Negative
Equus_caballus	Equidae	Perissodactyla	R_112	1994	Producers	MN	Weak	Low	Grazing/herbivory/browsing	Direct	North and Central America	Yes	Negative
Equus_caballus	Equidae	Perissodactyla	R_112	1994	Producers	MO	Strong	Medium	(10) Indirect impacts through interactions with other taxa	Indirect	North_and_Central_America	Yes	Positive
Capra_hircus	Bovidae	Cetartiodactyla	R_113	2011	Producers	MN	Weak	Medium	Grazing/herbivory/browsing; Chemical, physical or structural impact on ecosystems	Direct	Asia	No	Negative
Capra_hircus	Bovidae	Cetartiodactyla	R_113	2011	Producers	MN	Weak	Medium	Grazing/herbivory/browsing; Chemical, physical or structural impact on ecosystems	Direct	Asia	No	Negative
Capra_hircus	Bovidae	Cetartiodactyla	R_113	2011	Producers	MO	Strong	Medium	(10) Indirect impacts through interactions with other taxa	Indirect	Asia	No	Positive
Sus_scrofa	Suidae	Cetartiodactyla	R_114	2000	Primary_consumers	MC	Weak	High	Competition	Indirect	North and Central America	No	Negative
Ammotragus_lervia	Bovidae	Cetartiodactyla	R_115	2010	Producers	MO	Strong	Medium	Grazing/herbivory/browsing	Direct	Europe	Yes	Negative
Ammotragus_lervia	Bovidae	Cetartiodactyla	R_115	2010	Producers	MO	Strong	Medium	Grazing/herbivory/browsing	Direct	Europe	Yes	Negative
Ammotragus_lervia	Bovidae	Cetartiodactyla	R_115	2010	Producers	MO	Strong	Medium	Grazing/herbivory/browsing	Direct	Europe	Yes	Negative
Ammotragus_lervia	Bovidae	Cetartiodactyla	R_115	2010	Producers	MO	Strong	Medium	Grazing/herbivory/browsing	Direct	Europe	Yes	Negative
Capra_hircus	Bovidae	Cetartiodactyla	R_115	2010	Producers	MO	Strong	Medium	Grazing/herbivory/browsing	Direct	Europe	Yes	Negative
Capra_hircus	Bovidae	Cetartiodactyla	R_115	2010	Producers	MO	Strong	Medium	Grazing/herbivory/browsing	Direct	Europe	Yes	Negative
Capra_hircus	Bovidae	Cetartiodactyla	R_115	2010	Producers	MO	Strong	Medium	Grazing/herbivory/browsing	Direct	Europe	Yes	Negative
Capra_hircus	Bovidae	Cetartiodactyla	R_115	2010	Producers	MO	Strong	Medium	Grazing/herbivory/browsing	Direct	Europe	Yes	Negative
Odocoileus_hemionus	Cervidae	Cetartiodactyla	R_116	2008	Producers	MO	Strong	Medium	Grazing/herbivory/browsing	Direct	North and Central America	Yes	Negative
Odocoileus_hemionus	Cervidae	Cetartiodactyla	R_116	2008	Producers	MO	Strong	Medium	Grazing/herbivory/browsing	Direct	North and Central America	Yes	Negative
Odocoileus_hemionus	Cervidae	Cetartiodactyla	R_116	2008	Producers	MO	Strong	Medium	Grazing/herbivory/browsing	Direct	North and Central America	Yes	Negative
Odocoileus_hemionus	Cervidae	Cetartiodactyla	R_116	2008	Producers	MO	Strong	Medium	Grazing/herbivory/browsing	Direct	North and Central America	Yes	Negative
Odocoileus_hemionus	Cervidae	Cetartiodactyla	R_116	2008	Producers	MO	Strong	Medium	Grazing/herbivory/browsing	Direct	North and Central America	Yes	Negative
Odocoileus_hemionus	Cervidae	Cetartiodactyla	R_116	2008	Producers	MO	Strong	Medium	Grazing/herbivory/browsing	Direct	North and Central America	Yes	Negative
Odocoileus_hemionus	Cervidae	Cetartiodactyla	R_116	2008	Producers	MO	Strong	Medium	Grazing/herbivory/browsing	Direct	North and Central America	Yes	Negative
Odocoileus_hemionus	Cervidae	Cetartiodactyla	R_117	2006	Producers	MO	Strong	Medium	Grazing/herbivory/browsing	Direct	North and Central America	Yes	Negative
Odocoileus_hemionus	Cervidae	Cetartiodactyla	R_117	2006	Producers	MO	Strong	Medium	Grazing/herbivory/browsing	Direct	North and Central America	Yes	Negative
Odocoileus_hemionus	Cervidae	Cetartiodactyla	R_117	2006	Producers	MO	Strong	Medium	Grazing/herbivory/browsing	Direct	North and Central America	Yes	Negative
Odocoileus_hemionus	Cervidae	Cetartiodactyla	R_117	2006	Producers	MO	Strong	Medium	Grazing/herbivory/browsing	Direct	North and Central America	Yes	Negative
Odocoileus_hemionus	Cervidae	Cetartiodactyla	R_117	2006	Producers	MO	Strong	Medium	Grazing/herbivory/browsing	Direct	North and Central America	Yes	Negative
Odocoileus_hemionus	Cervidae	Cetartiodactyla	R_117	2006	Producers	MO	Strong	Medium	Grazing/herbivory/browsing	Direct	North and Central America	Yes	Negative
Odocoileus_hemionus	Cervidae	Cetartiodactyla	R_117	2006	Producers	MO	Strong	Medium	Grazing/herbivory/browsing	Direct	North and Central America	Yes	Negative
Odocoileus_hemionus	Cervidae	Cetartiodactyla	R_117	2006	Producers	MO	Strong	Medium	Grazing/herbivory/browsing	Direct	North and Central America	Yes	Negative
Odocoileus_hemionus	Cervidae	Cetartiodactyla	R_117	2006	Producers	MO	Strong	Medium	Grazing/herbivory/browsing	Direct	North and Central America	Yes	Negative
Odocoileus_hemionus	Cervidae	Cetartiodactyla	R_117	2006	Producers	MN	Weak	High	Grazing/herbivory/browsing	Direct	North and Central America	Yes	Negative
Odocoileus_hemionus	Cervidae	Cetartiodactyla	R_117	2006	Producers	MN	Weak	High	Grazing/herbivory/browsing	Direct	North and Central America	Yes	Negative
Odocoileus_hemionus	Cervidae	Cetartiodactyla	R_117	2006	Producers	MN	Weak	High	Grazing/herbivory/browsing	Direct	North and Central America	Yes	Negative
Sus_scrofa	Suidae	Cetartiodactyla	R_118	2018	Producers	MN	Weak	Medium	(5) Dispersal facilitation	Direct	Oceania	Yes	Positive
Sus_scrofa	Suidae	Cetartiodactyla	R_118	2018	Producers	MN	Weak	Low	(5) Dispersal facilitation	Direct	Oceania	Yes	Positive
Capra_hircus	Bovidae	Cetartiodactyla	R_119	1984	Primary_consumers	MN	Weak	Medium	Chemical, physical or structural impact on ecosystems	Indirect	Oceania	Yes	Negative
Capra_hircus	Bovidae	Cetartiodactyla	R_119	1984	Primary_consumers	MN	Weak	Medium	Chemical, physical or structural impact on ecosystems	Indirect	Oceania	Yes	Negative
Ovis_aries	Bovidae	Cetartiodactyla	R_12	2013	Secondary_consumers	MC	Weak	Medium	Chemical, physical or structural impact on ecosystems	Indirect	North and Central America	Yes	Negative
Ovis_aries	Bovidae	Cetartiodactyla	R_12	2013	Secondary_consumers	MO	Strong	Low	Chemical, physical or structural impact on ecosystems	Indirect	North and Central America	Yes	Negative
Ovis_aries	Bovidae	Cetartiodactyla	R_12	2013	Secondary_consumers	MO	Strong	Low	Chemical, physical or structural impact on ecosystems	Indirect	North and Central America	Yes	Negative
Ovis_aries	Bovidae	Cetartiodactyla	R_12	2013	Secondary_consumers	MO	Strong	Low	Chemical, physical or structural impact on ecosystems	Indirect	North and Central America	Yes	Negative
Ovis_aries	Bovidae	Cetartiodactyla	R_12	2013	Secondary_consumers	MR	Strong	Low	Chemical, physical or structural impact on ecosystems	Indirect	North and Central America	Yes	Negative
Ovis_aries	Bovidae	Cetartiodactyla	R_12	2013	Primary_consumers	MO	Strong	Low	Chemical, physical or structural impact on ecosystems	Indirect	North and Central America	Yes	Negative
Ovis_orientalis	Bovidae	Cetartiodactyla	R_12	2013	Secondary_consumers	MC	Weak	Medium	Chemical, physical or structural impact on ecosystems	Indirect	North and Central America	Yes	Negative
Ovis_orientalis	Bovidae	Cetartiodactyla	R_12	2013	Secondary_consumers	MO	Strong	Low	Chemical, physical or structural impact on ecosystems	Indirect	North and Central America	Yes	Negative
Ovis_orientalis	Bovidae	Cetartiodactyla	R_12	2013	Secondary_consumers	MO	Strong	Low	Chemical, physical or structural impact on ecosystems	Indirect	North and Central America	Yes	Negative
Ovis_orientalis	Bovidae	Cetartiodactyla	R_12	2013	Secondary_consumers	MO	Strong	Low	Chemical, physical or structural impact on ecosystems	Indirect	North and Central America	Yes	Negative
Ovis_orientalis	Bovidae	Cetartiodactyla	R_12	2013	Secondary_consumers	MR	Strong	Low	Chemical, physical or structural impact on ecosystems	Indirect	North and Central America	Yes	Negative
Ovis_orientalis	Bovidae	Cetartiodactyla	R_12	2013	Primary_consumers	MO	Strong	Low	Chemical, physical or structural impact on ecosystems	Indirect	North and Central America	Yes	Negative
Cervus_nippon	Cervidae	Cetartiodactyla	R_120	2010	Producers	MN	Weak	Medium	Grazing/herbivory/browsing	Direct	Europe	Yes	Negative
Cervus_nippon	Cervidae	Cetartiodactyla	R_120	2010	Producers	MN	Weak	Medium	Grazing/herbivory/browsing	Direct	Europe	Yes	Negative
Cervus_nippon	Cervidae	Cetartiodactyla	R_120	2010	Producers	MN	Weak	Medium	Grazing/herbivory/browsing	Direct	Europe	Yes	Negative
Cervus_nippon	Cervidae	Cetartiodactyla	R_120	2010	Producers	MN	Weak	Medium	Grazing/herbivory/browsing	Direct	Europe	Yes	Negative
Dama_dama	Cervidae	Cetartiodactyla	R_120	2010	Producers	MN	Weak	Low	Grazing/herbivory/browsing	Direct	Europe	Yes	Negative
Dama_dama	Cervidae	Cetartiodactyla	R_120	2010	Producers	MN	Weak	Low	Grazing/herbivory/browsing	Direct	Europe	Yes	Negative
Dama_dama	Cervidae	Cetartiodactyla	R_120	2010	Producers	MN	Weak	Low	Grazing/herbivory/browsing	Direct	Europe	Yes	Negative
Dama_dama	Cervidae	Cetartiodactyla	R_120	2010	Producers	MN	Weak	Low	Grazing/herbivory/browsing	Direct	Europe	Yes	Negative
Muntiacus_reevesi	Cervidae	Cetartiodactyla	R_120	2010	Producers	MN	Weak	Low	Grazing/herbivory/browsing	Direct	Europe	Yes	Negative
Muntiacus_reevesi	Cervidae	Cetartiodactyla	R_120	2010	Producers	MN	Weak	Low	Grazing/herbivory/browsing	Direct	Europe	Yes	Negative
Muntiacus_reevesi	Cervidae	Cetartiodactyla	R_120	2010	Producers	MN	Weak	Low	Grazing/herbivory/browsing	Direct	Europe	Yes	Negative
Muntiacus_reevesi	Cervidae	Cetartiodactyla	R_120	2010	Producers	MN	Weak	Low	Grazing/herbivory/browsing	Direct	Europe	Yes	Negative
Cervus_nippon	Cervidae	Cetartiodactyla	R_121	2007	Producers	MN	Weak	Low	Grazing/herbivory/browsing	Direct	Europe	Yes	Negative
Cervus_nippon	Cervidae	Cetartiodactyla	R_121	2007	Producers	MN	Weak	Low	Grazing/herbivory/browsing	Direct	Europe	Yes	Negative
Cervus_nippon	Cervidae	Cetartiodactyla	R_121	2007	Producers	MN	Weak	Low	Grazing/herbivory/browsing	Direct	Europe	Yes	Negative
Cervus_nippon	Cervidae	Cetartiodactyla	R_121	2007	Producers	MN	Weak	Low	Grazing/herbivory/browsing	Direct	Europe	Yes	Negative
Cervus_nippon	Cervidae	Cetartiodactyla	R_121	2007	Producers	MN	Weak	Low	Grazing/herbivory/browsing	Direct	Europe	Yes	Negative
Cervus_nippon	Cervidae	Cetartiodactyla	R_121	2007	Secondary_consumers	MO	Strong	Medium	Chemical, physical or structural impact on ecosystems	Indirect	Europe	Yes	Negative
Cervus_nippon	Cervidae	Cetartiodactyla	R_121	2007	Secondary_consumers	MO	Strong	Medium	Chemical, physical or structural impact on ecosystems	Indirect	Europe	Yes	Negative
Cervus_nippon	Cervidae	Cetartiodactyla	R_121	2007	Secondary_consumers	MO	Strong	Medium	Chemical, physical or structural impact on ecosystems	Indirect	Europe	Yes	Negative
Cervus_nippon	Cervidae	Cetartiodactyla	R_121	2007	Secondary_consumers	MO	Strong	Medium	Chemical, physical or structural impact on ecosystems	Indirect	Europe	Yes	Negative
Cervus_nippon	Cervidae	Cetartiodactyla	R_121	2007	Secondary_consumers	MO	Strong	Medium	Chemical, physical or structural impact on ecosystems	Indirect	Europe	Yes	Negative
Cervus_nippon	Cervidae	Cetartiodactyla	R_121	2007	Secondary_consumers	MO	Strong	Medium	Chemical, physical or structural impact on ecosystems	Indirect	Europe	Yes	Negative
Cervus_nippon	Cervidae	Cetartiodactyla	R_121	2007	Secondary_consumers	MO	Strong	Medium	Chemical, physical or structural impact on ecosystems	Indirect	Europe	Yes	Negative
Cervus_nippon	Cervidae	Cetartiodactyla	R_121	2007	Secondary_consumers	MO	Strong	Medium	Chemical, physical or structural impact on ecosystems	Indirect	Europe	Yes	Negative
Dama_dama	Cervidae	Cetartiodactyla	R_121	2007	Producers	MN	Weak	Low	Grazing/herbivory/browsing	Direct	Europe	Yes	Negative
Dama_dama	Cervidae	Cetartiodactyla	R_121	2007	Producers	MN	Weak	Low	Grazing/herbivory/browsing	Direct	Europe	Yes	Negative
Dama_dama	Cervidae	Cetartiodactyla	R_121	2007	Producers	MN	Weak	Low	Grazing/herbivory/browsing	Direct	Europe	Yes	Negative
Dama_dama	Cervidae	Cetartiodactyla	R_121	2007	Producers	MN	Weak	Low	Grazing/herbivory/browsing	Direct	Europe	Yes	Negative
Dama_dama	Cervidae	Cetartiodactyla	R_121	2007	Producers	MN	Weak	Low	Grazing/herbivory/browsing	Direct	Europe	Yes	Negative
Dama_dama	Cervidae	Cetartiodactyla	R_121	2007	Secondary_consumers	MO	Strong	Medium	Chemical, physical or structural impact on ecosystems	Indirect	Europe	Yes	Negative
Dama_dama	Cervidae	Cetartiodactyla	R_121	2007	Secondary_consumers	MO	Strong	Medium	Chemical, physical or structural impact on ecosystems	Indirect	Europe	Yes	Negative
Dama_dama	Cervidae	Cetartiodactyla	R_121	2007	Secondary_consumers	MO	Strong	Medium	Chemical, physical or structural impact on ecosystems	Indirect	Europe	Yes	Negative
Dama_dama	Cervidae	Cetartiodactyla	R_121	2007	Secondary_consumers	MO	Strong	Medium	Chemical, physical or structural impact on ecosystems	Indirect	Europe	Yes	Negative
Dama_dama	Cervidae	Cetartiodactyla	R_121	2007	Secondary_consumers	MO	Strong	Medium	Chemical, physical or structural impact on ecosystems	Indirect	Europe	Yes	Negative
Dama_dama	Cervidae	Cetartiodactyla	R_121	2007	Secondary_consumers	MO	Strong	Medium	Chemical, physical or structural impact on ecosystems	Indirect	Europe	Yes	Negative
Dama_dama	Cervidae	Cetartiodactyla	R_121	2007	Secondary_consumers	MO	Strong	Medium	Chemical, physical or structural impact on ecosystems	Indirect	Europe	Yes	Negative
Dama_dama	Cervidae	Cetartiodactyla	R_121	2007	Secondary_consumers	MO	Strong	Medium	Chemical, physical or structural impact on ecosystems	Indirect	Europe	Yes	Negative
Muntiacus_reevesi	Cervidae	Cetartiodactyla	R_121	2007	Secondary_consumers	MO	Strong	Medium	Chemical, physical or structural impact on ecosystems	Indirect	Europe	Yes	Negative
Muntiacus_reevesi	Cervidae	Cetartiodactyla	R_121	2007	Producers	MN	Weak	Low	Grazing/herbivory/browsing	Direct	Europe	Yes	Negative
Muntiacus_reevesi	Cervidae	Cetartiodactyla	R_121	2007	Producers	MN	Weak	Low	Grazing/herbivory/browsing	Direct	Europe	Yes	Negative
Muntiacus_reevesi	Cervidae	Cetartiodactyla	R_121	2007	Producers	MN	Weak	Low	Grazing/herbivory/browsing	Direct	Europe	Yes	Negative
Muntiacus_reevesi	Cervidae	Cetartiodactyla	R_121	2007	Producers	MN	Weak	Low	Grazing/herbivory/browsing	Direct	Europe	Yes	Negative
Muntiacus_reevesi	Cervidae	Cetartiodactyla	R_121	2007	Producers	MN	Weak	Low	Grazing/herbivory/browsing	Direct	Europe	Yes	Negative
Muntiacus_reevesi	Cervidae	Cetartiodactyla	R_121	2007	Secondary_consumers	MO	Strong	Medium	Chemical, physical or structural impact on ecosystems	Indirect	Europe	Yes	Negative
Muntiacus_reevesi	Cervidae	Cetartiodactyla	R_121	2007	Secondary_consumers	MO	Strong	Medium	Chemical, physical or structural impact on ecosystems	Indirect	Europe	Yes	Negative
Muntiacus_reevesi	Cervidae	Cetartiodactyla	R_121	2007	Secondary_consumers	MO	Strong	Medium	Chemical, physical or structural impact on ecosystems	Indirect	Europe	Yes	Negative
Muntiacus_reevesi	Cervidae	Cetartiodactyla	R_121	2007	Secondary_consumers	MO	Strong	Medium	Chemical, physical or structural impact on ecosystems	Indirect	Europe	Yes	Negative
Muntiacus_reevesi	Cervidae	Cetartiodactyla	R_121	2007	Secondary_consumers	MO	Strong	Medium	Chemical, physical or structural impact on ecosystems	Indirect	Europe	Yes	Negative
Muntiacus_reevesi	Cervidae	Cetartiodactyla	R_121	2007	Secondary_consumers	MO	Strong	Medium	Chemical, physical or structural impact on ecosystems	Indirect	Europe	Yes	Negative
Muntiacus_reevesi	Cervidae	Cetartiodactyla	R_121	2007	Secondary_consumers	MO	Strong	Medium	Chemical, physical or structural impact on ecosystems	Indirect	Europe	Yes	Negative
Capra_hircus	Bovidae	Cetartiodactyla	R_122	2018	Secondary_consumers	MC	Weak	Medium	Chemical, physical or structural impact on ecosystems	Indirect	Europe	Yes	Negative
Capra_hircus	Bovidae	Cetartiodactyla	R_122	2018	Producers	MO	Strong	High	Grazing/herbivory/browsing; Direct physical disturbance	Direct	Europe	Yes	Negative
Capra_hircus	Bovidae	Cetartiodactyla	R_122	2018	Producers	MO	Strong	High	Grazing/herbivory/browsing; Direct physical disturbance	Direct	Europe	Yes	Negative
Capra_hircus	Bovidae	Cetartiodactyla	R_122	2018	Producers	MO	Strong	High	Grazing/herbivory/browsing; Direct physical disturbance	Direct	Europe	Yes	Negative
Capra_hircus	Bovidae	Cetartiodactyla	R_122	2018	Secondary_consumers	MC	Weak	Medium	Chemical, physical or structural impact on ecosystems	Indirect	Europe	Yes	Negative
Capra_hircus	Bovidae	Cetartiodactyla	R_122	2018	Decomposers	MC	Weak	Medium	Chemical, physical or structural impact on ecosystems	Indirect	Europe	Yes	Negative
Capra_hircus	Bovidae	Cetartiodactyla	R_122	2018	Secondary_consumers	MO	Strong	Medium	Chemical, physical or structural impact on ecosystems	Indirect	Europe	Yes	Negative
Capra_hircus	Bovidae	Cetartiodactyla	R_122	2018	Secondary_consumers	MO	Strong	Medium	Chemical, physical or structural impact on ecosystems	Indirect	Europe	Yes	Negative
Capra_hircus	Bovidae	Cetartiodactyla	R_122	2018	Secondary_consumers	MC	Weak	Medium	Chemical, physical or structural impact on ecosystems	Indirect	Europe	Yes	Positive
Capra_hircus	Bovidae	Cetartiodactyla	R_122	2018	Producers	MO	Strong	High	(10) Indirect impacts through interactions with other taxa	Indirect	Europe	Yes	Positive
Capra_hircus	Bovidae	Cetartiodactyla	R_122	2018	Producers	MO	Strong	High	(10) Indirect impacts through interactions with other taxa	Indirect	Europe	Yes	Positive
Capra_hircus	Bovidae	Cetartiodactyla	R_122	2018	Producers	MO	Strong	High	(10) Indirect impacts through interactions with other taxa	Indirect	Europe	Yes	Positive
Capra_hircus	Bovidae	Cetartiodactyla	R_122	2018	Primary_consumers	MO	Strong	High	(6) Epibiosis or other direct provisions of habitat	Direct	Europe	Yes	Positive
Cervus_nippon	Cervidae	Cetartiodactyla	R_123	1999	Primary_consumers	MO	Strong	High	Hybridisation	Direct	Europe	Yes	Negative
Bos_taurus	Bovidae	Cetartiodactyla	R_124	1988	Producers	MN	Weak	Medium	(2) Overcompensation	Direct	Europe	Yes	Positive
Cervus_elaphus_germanicus	Cervidae	Cetartiodactyla	R_125	2010	Secondary_consumers	MN	Weak	Low	(3) Hybridisation	Direct	Europe	Yes	Positive
Cervus_elaphus_hippelaphus	Cervidae	Cetartiodactyla	R_125	2010	Secondary_consumers	MN	Weak	Low	(3) Hybridisation	Direct	Europe	Yes	Positive
Capra_hircus	Bovidae	Cetartiodactyla	R_126	1993	Producers	MO	Strong	Medium	Grazing/herbivory/browsing	Direct	South America	Yes	Negative
Capra_hircus	Bovidae	Cetartiodactyla	R_126	1993	Producers	MO	Strong	Medium	Grazing/herbivory/browsing	Direct	South America	Yes	Negative
Capra_hircus	Bovidae	Cetartiodactyla	R_126	1993	Producers	MO	Strong	Medium	Grazing/herbivory/browsing	Direct	South America	Yes	Negative
Capra_hircus	Bovidae	Cetartiodactyla	R_127	1975	Producers	MO	Strong	Low	Grazing/herbivory/browsing	Direct	South America	Yes	Negative
Equus_asinus	Equidae	Perissodactyla	R_128	1977	Producers	MN	Weak	Low	Grazing/herbivory/browsing	Direct	South America	Yes	Negative
Equus_asinus	Equidae	Perissodactyla	R_128	1977	Producers	MN	Weak	Low	Grazing/herbivory/browsing	Direct	South America	Yes	Negative
Equus_asinus	Equidae	Perissodactyla	R_128	1977	Producers	MN	Weak	Low	Grazing/herbivory/browsing	Direct	South America	Yes	Negative
Equus_asinus	Equidae	Perissodactyla	R_128	1977	Producers	MN	Weak	Low	Grazing/herbivory/browsing	Direct	South America	Yes	Negative
Equus_asinus	Equidae	Perissodactyla	R_128	1977	Producers	MN	Weak	Low	Grazing/herbivory/browsing	Direct	South America	Yes	Negative
Equus_asinus	Equidae	Perissodactyla	R_128	1977	Producers	MN	Weak	Low	Grazing/herbivory/browsing	Direct	South America	Yes	Negative
Cervus_nippon	Cervidae	Cetartiodactyla	R_129	2006	Producers	MO	Strong	Medium	Grazing/herbivory/browsing	Direct	Europe	Yes	Negative
Cervus_nippon	Cervidae	Cetartiodactyla	R_129	2006	Producers	MO	Strong	Medium	Grazing/herbivory/browsing	Direct	Europe	Yes	Negative
Cervus_nippon	Cervidae	Cetartiodactyla	R_129	2006	Producers	MO	Strong	Medium	Grazing/herbivory/browsing	Direct	Europe	Yes	Negative
Cervus_nippon	Cervidae	Cetartiodactyla	R_129	2006	Producers	MO	Strong	Medium	Grazing/herbivory/browsing	Direct	Europe	Yes	Negative
Cervus_nippon	Cervidae	Cetartiodactyla	R_129	2006	Producers	MO	Strong	Medium	Grazing/herbivory/browsing	Direct	Europe	Yes	Negative
Cervus_nippon	Cervidae	Cetartiodactyla	R_129	2006	Primary_consumers	MO	Strong	Medium	Chemical, physical or structural impact on ecosystems	Indirect	Europe	Yes	Negative
Cervus_nippon	Cervidae	Cetartiodactyla	R_129	2006	Producers	MO	Strong	Medium	(10) Indirect impacts through interactions with other taxa	Indirect	Europe	Yes	Positive
Cervus_nippon	Cervidae	Cetartiodactyla	R_129	2006	Producers	MO	Strong	Medium	(10) Indirect impacts through interactions with other taxa	Indirect	Europe	Yes	Positive
Cervus_nippon	Cervidae	Cetartiodactyla	R_129	2006	Primary_consumers	MO	Strong	Medium	(10) Indirect impacts through interactions with other taxa	Indirect	Europe	Yes	Positive
Cervus_nippon	Cervidae	Cetartiodactyla	R_129	2006	Primary_consumers	MO	Strong	Medium	(10) Indirect impacts through interactions with other taxa	Indirect	Europe	Yes	Positive
Cervus_nippon	Cervidae	Cetartiodactyla	R_129	2006	Secondary_consumers	MN	Weak	Low	(10) Indirect impacts through interactions with other taxa	Indirect	Europe	Yes	Positive
Sus_scrofa	Suidae	Cetartiodactyla	R_13	1982	Producers	MN	Weak	High	Direct physical disturbance	Direct	North and Central America	Yes	Negative
Sus_scrofa	Suidae	Cetartiodactyla	R_13	1982	Producers	MN	Weak	High	Direct physical disturbance	Direct	North and Central America	Yes	Negative
Capra_hircus	Bovidae	Cetartiodactyla	R_130	2001	Primary_consumers	MO	Strong	High	Chemical, physical or structural impact on ecosystems	Indirect	Oceania	Yes	Negative
Capra_hircus	Bovidae	Cetartiodactyla	R_130	2001	Producers	MN	Weak	Medium	Grazing/herbivory/browsing	Direct	Oceania	Yes	Negative
Ovis_aries	Bovidae	Cetartiodactyla	R_131	1979	Producers	MN	Weak	Low	Grazing/herbivory/browsing	Direct	Oceania	No	Negative
Ovis_aries	Bovidae	Cetartiodactyla	R_131	1979	Producers	MN	Weak	Low	Grazing/herbivory/browsing	Direct	Oceania	No	Negative
Sus_scrofa	Suidae	Cetartiodactyla	R_132	1970	Secondary_consumers	MN	Weak	Low	Predation	Direct	South America	Yes	Negative
Odocoileus_virginianus	Cervidae	Cetartiodactyla	R_133	2001	Secondary_consumers	MO	Strong	Medium	Chemical, physical or structural impact on ecosystems	Indirect	North and Central America	Yes	Negative
Odocoileus_virginianus	Cervidae	Cetartiodactyla	R_133	2001	Primary_consumers	MO	Strong	Low	Chemical, physical or structural impact on ecosystems	Indirect	North and Central America	Yes	Negative
Odocoileus_virginianus	Cervidae	Cetartiodactyla	R_133	2001	Secondary_consumers	MO	Strong	Medium	Chemical, physical or structural impact on ecosystems	Indirect	North and Central America	Yes	Negative
Odocoileus_virginianus	Cervidae	Cetartiodactyla	R_133	2001	Primary_consumers	MO	Strong	Low	Chemical, physical or structural impact on ecosystems	Indirect	North and Central America	Yes	Negative
Odocoileus_virginianus	Cervidae	Cetartiodactyla	R_133	2001	Primary_consumers	MO	Strong	Low	Chemical, physical or structural impact on ecosystems	Indirect	North and Central America	Yes	Negative
Sus_scrofa	Suidae	Cetartiodactyla	R_134	2013	Producers	MN	Weak	Low	Direct physical disturbance	Direct	South America	No	Negative
Sus_scrofa	Suidae	Cetartiodactyla	R_135	1969	Secondary_consumers	MN	Weak	Medium	Predation	Direct	North and Central America	No	Negative
Sus_scrofa	Suidae	Cetartiodactyla	R_135	1969	Secondary_consumers	MN	Weak	Medium	Predation	Direct	North and Central America	No	Negative
Bos_taurus	Bovidae	Cetartiodactyla	R_136	1999	Producers	MN	Weak	Low	Grazing/herbivory/browsing	Direct	North and Central America	Yes	Negative
Bos_taurus	Bovidae	Cetartiodactyla	R_136	1999	Producers	MN	Weak	Low	Grazing/herbivory/browsing	Direct	North and Central America	Yes	Negative
Capra_hircus	Bovidae	Cetartiodactyla	R_136	1999	Producers	MN	Weak	Low	Grazing/herbivory/browsing	Direct	North and Central America	Yes	Negative
Capra_hircus	Bovidae	Cetartiodactyla	R_136	1999	Producers	MN	Weak	Low	Grazing/herbivory/browsing	Direct	North and Central America	Yes	Negative
Equus_caballus	Equidae	Perissodactyla	R_136	1999	Producers	MN	Weak	Low	Grazing/herbivory/browsing	Direct	North and Central America	Yes	Negative
Equus_caballus	Equidae	Perissodactyla	R_136	1999	Producers	MN	Weak	Low	Grazing/herbivory/browsing	Direct	North and Central America	Yes	Negative
Ovis_aries	Bovidae	Cetartiodactyla	R_136	1999	Producers	MN	Weak	Low	Grazing/herbivory/browsing	Direct	North and Central America	Yes	Negative
Ovis_aries	Bovidae	Cetartiodactyla	R_136	1999	Producers	MN	Weak	Low	Grazing/herbivory/browsing	Direct	North and Central America	Yes	Negative
Ovis_orientalis	Bovidae	Cetartiodactyla	R_136	1999	Producers	MN	Weak	Low	Grazing/herbivory/browsing	Direct	North and Central America	Yes	Negative
Ovis_orientalis	Bovidae	Cetartiodactyla	R_136	1999	Producers	MN	Weak	Low	Grazing/herbivory/browsing	Direct	North and Central America	Yes	Negative
Capra_hircus	Bovidae	Cetartiodactyla	R_137	1995	Producers	MN	Weak	Medium	Grazing/herbivory/browsing	Direct	South America	Yes	Negative
Equus_asinus	Equidae	Perissodactyla	R_137	1995	Producers	MN	Weak	Medium	Grazing/herbivory/browsing	Direct	South America	Yes	Negative
Sus_scrofa	Suidae	Cetartiodactyla	R_138	1982	Producers	MO	Strong	Low	Direct physical disturbance	Direct	North and Central America	Yes	Negative
Sus_scrofa	Suidae	Cetartiodactyla	R_138	1982	Producers	MO	Strong	Low	Direct physical disturbance	Direct	North and Central America	Yes	Negative
Sus_scrofa	Suidae	Cetartiodactyla	R_138	1982	Producers	MO	Strong	Low	Direct physical disturbance	Direct	North and Central America	Yes	Negative
Sus_scrofa	Suidae	Cetartiodactyla	R_138	1982	Producers	MO	Strong	Low	Direct physical disturbance	Direct	North and Central America	Yes	Negative
Sus_scrofa	Suidae	Cetartiodactyla	R_138	1982	Producers	MO	Strong	Low	Direct physical disturbance	Direct	North and Central America	Yes	Negative
Bos_taurus	Bovidae	Cetartiodactyla	R_139	1961	Producers	MR	Strong	Low	Grazing/herbivory/browsing	Direct	Europe	Yes	Negative
Sus_scrofa	Suidae	Cetartiodactyla	R_14	2014	Producers	MO	Strong	Low	Direct physical disturbance	Direct	South America	No	Negative
Dama_dama	Cervidae	Cetartiodactyla	R_140	2011	Secondary_consumers	MO	Strong	Medium	Chemical, physical or structural impact on ecosystems	Indirect	Europe	Yes	Negative
Dama_dama	Cervidae	Cetartiodactyla	R_140	2011	Secondary_consumers	MO	Strong	Medium	Chemical, physical or structural impact on ecosystems	Indirect	Europe	Yes	Negative
Dama_dama	Cervidae	Cetartiodactyla	R_140	2011	Secondary_consumers	MO	Strong	Medium	Chemical, physical or structural impact on ecosystems	Indirect	Europe	Yes	Negative
Dama_dama	Cervidae	Cetartiodactyla	R_140	2011	Secondary_consumers	MO	Strong	Medium	Chemical, physical or structural impact on ecosystems	Indirect	Europe	Yes	Negative
Muntiacus_reevesi	Cervidae	Cetartiodactyla	R_140	2011	Secondary_consumers	MO	Strong	Medium	Chemical, physical or structural impact on ecosystems	Indirect	Europe	Yes	Negative
Muntiacus_reevesi	Cervidae	Cetartiodactyla	R_140	2011	Secondary_consumers	MO	Strong	Medium	Chemical, physical or structural impact on ecosystems	Indirect	Europe	Yes	Negative
Muntiacus_reevesi	Cervidae	Cetartiodactyla	R_140	2011	Secondary_consumers	MO	Strong	Medium	Chemical, physical or structural impact on ecosystems	Indirect	Europe	Yes	Negative
Muntiacus_reevesi	Cervidae	Cetartiodactyla	R_140	2011	Secondary_consumers	MO	Strong	Medium	Chemical, physical or structural impact on ecosystems	Indirect	Europe	Yes	Negative
Cervus_nippon	Cervidae	Cetartiodactyla	R_141	2005	Producers	MN	Weak	Medium	Direct physical disturbance	Direct	Europe	Yes	Negative
Sus_scrofa	Suidae	Cetartiodactyla	R_142	1981	Producers	MO	Strong	Low	Direct physical disturbance	Direct	North and Central America	No	Negative
Sus_scrofa	Suidae	Cetartiodactyla	R_143	1990	Secondary_consumers	MN	Weak	Low	Predation	Direct	North and Central America	Yes	Negative
Sus_scrofa	Suidae	Cetartiodactyla	R_144	1977	Producers	MN	Weak	Low	Direct physical disturbance	Direct	North and Central America	No	Negative
Sus_scrofa	Suidae	Cetartiodactyla	R_144	1977	Producers	MN	Weak	Low	Direct physical disturbance	Direct	North and Central America	No	Negative
Sus_scrofa	Suidae	Cetartiodactyla	R_144	1977	Producers	MN	Weak	Low	Direct physical disturbance	Direct	North and Central America	No	Negative
Sus_scrofa	Suidae	Cetartiodactyla	R_144	1977	Producers	MN	Weak	Low	Direct physical disturbance	Direct	North and Central America	No	Negative
Dama_dama	Cervidae	Cetartiodactyla	R_145	2005	Producers	MN	Weak	Medium	Grazing/herbivory/browsing	Direct	Oceania	Yes	Negative
Dama_dama	Cervidae	Cetartiodactyla	R_145	2005	Producers	MN	Weak	Medium	Grazing/herbivory/browsing	Direct	Oceania	Yes	Negative
Dama_dama	Cervidae	Cetartiodactyla	R_145	2005	Producers	MN	Weak	Medium	Grazing/herbivory/browsing	Direct	Oceania	Yes	Negative
Dama_dama	Cervidae	Cetartiodactyla	R_145	2005	Producers	MN	Weak	Medium	Grazing/herbivory/browsing	Direct	Oceania	Yes	Negative
Cervus_nippon	Cervidae	Cetartiodactyla	R_146	2006	Producers	MN	Weak	Medium	Grazing/herbivory/browsing	Direct	Oceania	Yes	Negative
Cervus_elaphus	Cervidae	Cetartiodactyla	R_147	2007	Producers	MO	Strong	Medium	Grazing/herbivory/browsing	Direct	Oceania	Yes	Negative
Cervus_elaphus	Cervidae	Cetartiodactyla	R_147	2007	Producers	MO	Strong	Medium	Grazing/herbivory/browsing	Direct	Oceania	Yes	Negative
Cervus_elaphus	Cervidae	Cetartiodactyla	R_147	2007	Producers	MO	Strong	Medium	Grazing/herbivory/browsing	Direct	Oceania	Yes	Negative
Cervus_elaphus	Cervidae	Cetartiodactyla	R_147	2007	Producers	MN	Weak	Medium	Grazing/herbivory/browsing	Direct	Oceania	Yes	Negative
Cervus_elaphus	Cervidae	Cetartiodactyla	R_147	2007	Producers	MN	Weak	Medium	Grazing/herbivory/browsing	Direct	Oceania	Yes	Negative
Cervus_elaphus	Cervidae	Cetartiodactyla	R_147	2007	Producers	MN	Weak	Medium	Grazing/herbivory/browsing	Direct	Oceania	Yes	Negative
Cervus_elaphus	Cervidae	Cetartiodactyla	R_148	2005	Producers	MN	Weak	Medium	Grazing/herbivory/browsing	Direct	Oceania	Yes	Negative
Cervus_elaphus	Cervidae	Cetartiodactyla	R_148	2005	Producers	MN	Weak	Medium	Grazing/herbivory/browsing	Direct	Oceania	Yes	Negative
Cervus_elaphus	Cervidae	Cetartiodactyla	R_148	2005	Producers	MC	Weak	High	Grazing/herbivory/browsing	Direct	Oceania	Yes	Negative
Cervus_elaphus	Cervidae	Cetartiodactyla	R_148	2005	Producers	MC	Weak	High	Grazing/herbivory/browsing	Direct	Oceania	Yes	Negative
Cervus_elaphus	Cervidae	Cetartiodactyla	R_148	2005	Producers	MC	Weak	High	Grazing/herbivory/browsing	Direct	Oceania	Yes	Negative
Boselaphus_tragocamelus	Bovidae	Cetartiodactyla	R_149	2012	Primary_consumers	MO	Strong	Medium	(10) Indirect impacts through interactions with other taxa	Indirect	Europe	No	Positive
Boselaphus_tragocamelus	Bovidae	Cetartiodactyla	R_149	2012	Primary_consumers	MO	Strong	Medium	(10) Indirect impacts through interactions with other taxa	Indirect	Europe	No	Positive
Dama_dama	Cervidae	Cetartiodactyla	R_149	2012	Primary_consumers	MO	Strong	Medium	Competition	Indirect	Europe	No	Negative
Cervus_elaphus	Cervidae	Cetartiodactyla	R_15	2012	Producers	MN	Weak	Medium	Grazing/herbivory/browsing	Direct	South America	No	Negative
Cervus_elaphus	Cervidae	Cetartiodactyla	R_15	2012	Producers	MN	Weak	Medium	Grazing/herbivory/browsing	Direct	South America	No	Negative
Cervus_elaphus	Cervidae	Cetartiodactyla	R_15	2012	Producers	MN	Weak	Medium	Grazing/herbivory/browsing	Direct	South America	No	Negative
Cervus_elaphus	Cervidae	Cetartiodactyla	R_15	2012	Producers	MN	Weak	Medium	Grazing/herbivory/browsing	Direct	South America	No	Negative
Dama_dama	Cervidae	Cetartiodactyla	R_15	2012	Producers	MN	Weak	Low	Grazing/herbivory/browsing	Direct	South America	No	Negative
Dama_dama	Cervidae	Cetartiodactyla	R_15	2012	Producers	MN	Weak	Low	Grazing/herbivory/browsing	Direct	South America	No	Negative
Dama_dama	Cervidae	Cetartiodactyla	R_15	2012	Producers	MN	Weak	Low	Grazing/herbivory/browsing	Direct	South America	No	Negative
Dama_dama	Cervidae	Cetartiodactyla	R_15	2012	Producers	MN	Weak	Low	Grazing/herbivory/browsing	Direct	South America	No	Negative
Sus_scrofa	Suidae	Cetartiodactyla	R_150	1981	Producers	MN	Weak	Low	Direct physical disturbance	Direct	North and Central America	Yes	Negative
Sus_scrofa	Suidae	Cetartiodactyla	R_150	1981	Producers	MN	Weak	Low	Direct physical disturbance	Direct	North and Central America	Yes	Negative
Sus_scrofa	Suidae	Cetartiodactyla	R_150	1981	Producers	MN	Weak	Low	Direct physical disturbance	Direct	North and Central America	Yes	Negative
Cervus_elaphus	Cervidae	Cetartiodactyla	R_151	1994	Producers	MN	Weak	Medium	Grazing/herbivory/browsing	Direct	Oceania	Yes	Negative
Ovis_aries	Bovidae	Cetartiodactyla	R_153	1983	Secondary_consumers	MC	Weak	Low	Chemical, physical or structural impact on ecosystems	Indirect	North and Central America	Yes	Negative
Ovis_aries	Bovidae	Cetartiodactyla	R_153	1983	Secondary_consumers	MC	Weak	Low	Chemical, physical or structural impact on ecosystems	Indirect	North and Central America	Yes	Negative
Ovis_aries	Bovidae	Cetartiodactyla	R_153	1983	Secondary_consumers	MR	Strong	Low	Chemical, physical or structural impact on ecosystems	Indirect	North_and_Central_America	Yes	Positive
Ovis_aries	Bovidae	Cetartiodactyla	R_153	1983	Secondary_consumers	MR	Strong	Low	Chemical, physical or structural impact on ecosystems	Indirect	North_and_Central_America	Yes	Positive
Sus_scrofa	Suidae	Cetartiodactyla	R_154	2010	Secondary_consumers	MN	Weak	Low	Predation	Direct	North and Central America	No	Negative
Sus_scrofa	Suidae	Cetartiodactyla	R_154	2010	Secondary_consumers	MN	Weak	Low	Predation	Direct	North and Central America	No	Negative
Sus_scrofa	Suidae	Cetartiodactyla	R_154	2010	Secondary_consumers	MN	Weak	Low	Predation	Direct	North and Central America	No	Negative
Sus_scrofa	Suidae	Cetartiodactyla	R_154	2010	Secondary_consumers	MN	Weak	Low	Predation	Direct	North and Central America	No	Negative
Sus_scrofa	Suidae	Cetartiodactyla	R_154	2010	Secondary_consumers	MN	Weak	Low	Predation	Direct	North and Central America	No	Negative
Sus_scrofa	Suidae	Cetartiodactyla	R_155	2017	Producers	MN	Weak	Low	Direct physical disturbance	Direct	North and Central America	No	Negative
Sus_scrofa	Suidae	Cetartiodactyla	R_155	2017	Producers	MN	Weak	Low	Direct physical disturbance	Direct	North and Central America	No	Negative
Sus_scrofa	Suidae	Cetartiodactyla	R_155	2017	Producers	MN	Weak	Low	Direct physical disturbance	Direct	North and Central America	No	Negative
Dama_dama	Cervidae	Cetartiodactyla	R_156	2004	Producers	MN	Weak	Low	Grazing/herbivory/browsing	Direct	Europe	Yes	Negative
Dama_dama	Cervidae	Cetartiodactyla	R_156	2004	Producers	MN	Weak	Low	Grazing/herbivory/browsing	Direct	Europe	Yes	Negative
Dama_dama	Cervidae	Cetartiodactyla	R_156	2004	Producers	MN	Weak	Low	Grazing/herbivory/browsing	Direct	Europe	Yes	Negative
Dama_dama	Cervidae	Cetartiodactyla	R_156	2004	Producers	MN	Weak	Low	Grazing/herbivory/browsing	Direct	Europe	Yes	Negative
Dama_dama	Cervidae	Cetartiodactyla	R_156	2004	Producers	MN	Weak	Low	Grazing/herbivory/browsing	Direct	Europe	Yes	Negative
Muntiacus_reevesi	Cervidae	Cetartiodactyla	R_156	2004	Producers	MN	Weak	Low	Grazing/herbivory/browsing	Direct	Europe	Yes	Negative
Muntiacus_reevesi	Cervidae	Cetartiodactyla	R_156	2004	Producers	MN	Weak	Low	Grazing/herbivory/browsing	Direct	Europe	Yes	Negative
Muntiacus_reevesi	Cervidae	Cetartiodactyla	R_156	2004	Producers	MN	Weak	Low	Grazing/herbivory/browsing	Direct	Europe	Yes	Negative
Muntiacus_reevesi	Cervidae	Cetartiodactyla	R_156	2004	Producers	MN	Weak	Low	Grazing/herbivory/browsing	Direct	Europe	Yes	Negative
Muntiacus_reevesi	Cervidae	Cetartiodactyla	R_156	2004	Producers	MN	Weak	Low	Grazing/herbivory/browsing	Direct	Europe	Yes	Negative
Sus_scrofa	Suidae	Cetartiodactyla	R_157	2006	Secondary_consumers	MN	Weak	Low	Indirect impact through interaction with other species	Indirect	North and Central America	No	Negative
Sus_scrofa	Suidae	Cetartiodactyla	R_157	2006	Secondary_consumers	MN	Weak	Low	Indirect impact through interaction with other species	Indirect	North and Central America	No	Negative
Sus_scrofa	Suidae	Cetartiodactyla	R_157	2006	Secondary_consumers	MN	Weak	Low	Indirect impact through interaction with other species	Indirect	North and Central America	No	Negative
Sus_scrofa	Suidae	Cetartiodactyla	R_157	2006	Secondary_consumers	MN	Weak	Low	Indirect impact through interaction with other species	Indirect	North and Central America	No	Negative
Sus_scrofa	Suidae	Cetartiodactyla	R_157	2006	Secondary_consumers	MN	Weak	Low	Indirect impact through interaction with other species	Indirect	North and Central America	No	Negative
Sus_scrofa	Suidae	Cetartiodactyla	R_157	2006	Primary_consumers	MN	Weak	Low	Indirect impact through interaction with other species	Indirect	North and Central America	No	Negative
Sus_scrofa	Suidae	Cetartiodactyla	R_157	2006	Primary_consumers	MN	Weak	Low	Indirect impact through interaction with other species	Indirect	North and Central America	No	Negative
Sus_scrofa	Suidae	Cetartiodactyla	R_157	2006	Primary_consumers	MN	Weak	Low	Indirect impact through interaction with other species	Indirect	North and Central America	No	Negative
Sus_scrofa	Suidae	Cetartiodactyla	R_157	2006	Primary_consumers	MN	Weak	Low	Indirect impact through interaction with other species	Indirect	North and Central America	No	Negative
Sus_scrofa	Suidae	Cetartiodactyla	R_157	2006	Decomposers	MN	Weak	Low	Indirect impact through interaction with other species	Indirect	North and Central America	No	Negative
Sus_scrofa	Suidae	Cetartiodactyla	R_157	2006	Primary_consumers	MN	Weak	Low	Indirect impact through interaction with other species	Indirect	North and Central America	No	Negative
Sus_scrofa	Suidae	Cetartiodactyla	R_157	2006	Primary_consumers	MN	Weak	Low	Indirect impact through interaction with other species	Indirect	North and Central America	No	Negative
Sus_scrofa	Suidae	Cetartiodactyla	R_157	2006	Primary_consumers	MN	Weak	Low	Indirect impact through interaction with other species	Indirect	North and Central America	No	Negative
Sus_scrofa	Suidae	Cetartiodactyla	R_157	2006	Producers	MN	Weak	Low	(7) Chemical impact on ecosystem	Indirect	North_and_Central_America	No	Positive
Sus_scrofa	Suidae	Cetartiodactyla	R_158	1980	Producers	MO	Strong	Low	Direct physical disturbance	Direct	North and Central America	Yes	Negative
Sus_scrofa	Suidae	Cetartiodactyla	R_158	1980	Producers	MO	Strong	Low	Direct physical disturbance	Direct	North and Central America	Yes	Negative
Oreamnos_americanus	Bovidae	Cetartiodactyla	R_159	1989	Producers	MN	Weak	High	Grazing/herbivory/browsing; Direct physical disturbance	Direct	North and Central America	No	Negative
Cervus_nippon	Cervidae	Cetartiodactyla	R_16	2009	Primary_consumers	MN	Weak	Low	Hybridisation	Direct	Europe	Yes	Negative
Rusa_timorensis	Cervidae	Cetartiodactyla	R_160	2005	Producers	MN	Weak	Medium	Grazing/herbivory/browsing	Direct	Oceania	No	Negative
Rusa_timorensis	Cervidae	Cetartiodactyla	R_160	2005	Producers	MN	Weak	Medium	Grazing/herbivory/browsing	Direct	Oceania	No	Negative
Rusa_timorensis	Cervidae	Cetartiodactyla	R_160	2005	Producers	MN	Weak	Medium	Grazing/herbivory/browsing	Direct	Oceania	No	Negative
Rusa_timorensis	Cervidae	Cetartiodactyla	R_160	2005	Producers	MN	Weak	Medium	Grazing/herbivory/browsing	Direct	Oceania	No	Negative
Rusa_timorensis	Cervidae	Cetartiodactyla	R_160	2005	Producers	MN	Weak	Medium	Grazing/herbivory/browsing	Direct	Oceania	No	Negative
Rusa_timorensis	Cervidae	Cetartiodactyla	R_160	2005	Producers	MN	Weak	Medium	Grazing/herbivory/browsing	Direct	Oceania	No	Negative
Rusa_timorensis	Cervidae	Cetartiodactyla	R_160	2005	Producers	MN	Weak	Medium	Grazing/herbivory/browsing	Direct	Oceania	No	Negative
Rusa_timorensis	Cervidae	Cetartiodactyla	R_160	2005	Producers	MN	Weak	Medium	Grazing/herbivory/browsing	Direct	Oceania	No	Negative
Rusa_timorensis	Cervidae	Cetartiodactyla	R_160	2005	Producers	MN	Weak	Medium	Grazing/herbivory/browsing	Direct	Oceania	No	Negative
Rusa_timorensis	Cervidae	Cetartiodactyla	R_160	2005	Producers	MN	Weak	Medium	Grazing/herbivory/browsing	Direct	Oceania	No	Negative
Capra_hircus	Bovidae	Cetartiodactyla	R_161	2005	Producers	MO	Strong	High	Grazing/herbivory/browsing	Direct	North and Central America	Yes	Negative
Capra_hircus	Bovidae	Cetartiodactyla	R_161	2005	Producers	MO	Strong	High	Grazing/herbivory/browsing	Direct	North and Central America	Yes	Negative
Capra_hircus	Bovidae	Cetartiodactyla	R_161	2005	Producers	MO	Strong	High	Grazing/herbivory/browsing	Direct	North and Central America	Yes	Negative
Capra_hircus	Bovidae	Cetartiodactyla	R_161	2005	Producers	MO	Strong	Low	Grazing/herbivory/browsing	Direct	North and Central America	Yes	Negative
Capra_hircus	Bovidae	Cetartiodactyla	R_161	2005	Producers	MN	Weak	Medium	Grazing/herbivory/browsing	Direct	North and Central America	Yes	Negative
Capra_hircus	Bovidae	Cetartiodactyla	R_161	2005	Producers	MN	Weak	Medium	Grazing/herbivory/browsing	Direct	North and Central America	Yes	Negative
Cervus_nippon	Cervidae	Cetartiodactyla	R_162	2002	Producers	MN	Weak	Medium	Grazing/herbivory/browsing	Direct	Europe	Yes	Negative
Capra_hircus	Bovidae	Cetartiodactyla	R_163	2010	Producers	MO	Strong	Low	Grazing/herbivory/browsing; Direct physical disturbance	Direct	Asia	Yes	Negative
Capra_hircus	Bovidae	Cetartiodactyla	R_164	2002	Producers	MO	Strong	Low	Grazing/herbivory/browsing; Chemical, physical or structural impact on ecosystems	Direct	Oceania	Yes	Negative
Capra_hircus	Bovidae	Cetartiodactyla	R_164	2002	Producers	MO	Strong	Low	Grazing/herbivory/browsing; Chemical, physical or structural impact on ecosystems	Direct	Oceania	Yes	Negative
Capra_hircus	Bovidae	Cetartiodactyla	R_164	2002	Producers	MO	Strong	Low	Grazing/herbivory/browsing; Chemical, physical or structural impact on ecosystems	Direct	Oceania	Yes	Negative
Capra_hircus	Bovidae	Cetartiodactyla	R_164	2002	Producers	MO	Strong	Low	Grazing/herbivory/browsing; Chemical, physical or structural impact on ecosystems	Direct	Oceania	Yes	Negative
Capra_hircus	Bovidae	Cetartiodactyla	R_164	2002	Producers	MO	Strong	Low	Grazing/herbivory/browsing; Chemical, physical or structural impact on ecosystems	Direct	Oceania	Yes	Negative
Capra_hircus	Bovidae	Cetartiodactyla	R_164	2002	Producers	MO	Strong	Low	Grazing/herbivory/browsing; Chemical, physical or structural impact on ecosystems	Direct	Oceania	Yes	Negative
Capra_hircus	Bovidae	Cetartiodactyla	R_164	2002	Producers	MO	Strong	Low	Grazing/herbivory/browsing; Chemical, physical or structural impact on ecosystems	Direct	Oceania	Yes	Negative
Capra_hircus	Bovidae	Cetartiodactyla	R_164	2002	Producers	MO	Strong	Low	Grazing/herbivory/browsing; Chemical, physical or structural impact on ecosystems	Direct	Oceania	Yes	Negative
Capra_hircus	Bovidae	Cetartiodactyla	R_164	2002	Secondary_consumers	MO	Strong	Medium	Chemical, physical or structural impact on ecosystems	Indirect	Oceania	Yes	Negative
Capra_hircus	Bovidae	Cetartiodactyla	R_164	2002	Secondary_consumers	MO	Strong	Medium	Chemical, physical or structural impact on ecosystems	Indirect	Oceania	Yes	Negative
Capra_hircus	Bovidae	Cetartiodactyla	R_164	2002	Producers	MO	Strong	Low	(10) Indirect impacts through interactions with other taxa	Indirect	Oceania	Yes	Positive
Capra_hircus	Bovidae	Cetartiodactyla	R_164	2002	Producers	MO	Strong	Low	(10) Indirect impacts through interactions with other taxa	Indirect	Oceania	Yes	Positive
Capra_hircus	Bovidae	Cetartiodactyla	R_164	2002	Producers	MO	Strong	Low	(10) Indirect impacts through interactions with other taxa	Indirect	Oceania	Yes	Positive
Capra_hircus	Bovidae	Cetartiodactyla	R_164	2002	Producers	MO	Strong	Low	(10) Indirect impacts through interactions with other taxa	Indirect	Oceania	Yes	Positive
Capra_hircus	Bovidae	Cetartiodactyla	R_164	2002	Producers	MO	Strong	Low	(10) Indirect impacts through interactions with other taxa	Indirect	Oceania	Yes	Positive
Sus_scrofa	Suidae	Cetartiodactyla	R_164	2002	Secondary_consumers	MO	Strong	Medium	Predation	Direct	Oceania	Yes	Negative
Sus_scrofa	Suidae	Cetartiodactyla	R_164	2002	Secondary_consumers	MO	Strong	Medium	Predation	Direct	Oceania	Yes	Negative
Sus_scrofa	Suidae	Cetartiodactyla	R_164	2002	Producers	MO	Strong	Low	Grazing/herbivory/browsing; Chemical, physical or structural impact on ecosystems	Direct	Oceania	Yes	Negative
Sus_scrofa	Suidae	Cetartiodactyla	R_164	2002	Producers	MO	Strong	Low	Grazing/herbivory/browsing; Chemical, physical or structural impact on ecosystems	Direct	Oceania	Yes	Negative
Sus_scrofa	Suidae	Cetartiodactyla	R_164	2002	Producers	MO	Strong	Low	Grazing/herbivory/browsing; Chemical, physical or structural impact on ecosystems	Direct	Oceania	Yes	Negative
Sus_scrofa	Suidae	Cetartiodactyla	R_164	2002	Producers	MO	Strong	Low	Grazing/herbivory/browsing; Chemical, physical or structural impact on ecosystems	Direct	Oceania	Yes	Negative
Sus_scrofa	Suidae	Cetartiodactyla	R_164	2002	Producers	MO	Strong	Low	Grazing/herbivory/browsing; Chemical, physical or structural impact on ecosystems	Direct	Oceania	Yes	Negative
Sus_scrofa	Suidae	Cetartiodactyla	R_164	2002	Producers	MO	Strong	Low	Grazing/herbivory/browsing; Chemical, physical or structural impact on ecosystems	Direct	Oceania	Yes	Negative
Sus_scrofa	Suidae	Cetartiodactyla	R_164	2002	Producers	MO	Strong	Low	Grazing/herbivory/browsing; Chemical, physical or structural impact on ecosystems	Direct	Oceania	Yes	Negative
Sus_scrofa	Suidae	Cetartiodactyla	R_164	2002	Producers	MO	Strong	Low	Grazing/herbivory/browsing; Chemical, physical or structural impact on ecosystems	Direct	Oceania	Yes	Negative
Sus_scrofa	Suidae	Cetartiodactyla	R_164	2002	Producers	MO	Strong	Low	(10) Indirect impacts through interactions with other taxa	Indirect	Oceania	Yes	Positive
Sus_scrofa	Suidae	Cetartiodactyla	R_164	2002	Producers	MO	Strong	Low	(10) Indirect impacts through interactions with other taxa	Indirect	Oceania	Yes	Positive
Sus_scrofa	Suidae	Cetartiodactyla	R_164	2002	Producers	MO	Strong	Low	(10) Indirect impacts through interactions with other taxa	Indirect	Oceania	Yes	Positive
Sus_scrofa	Suidae	Cetartiodactyla	R_164	2002	Producers	MO	Strong	Low	(10) Indirect impacts through interactions with other taxa	Indirect	Oceania	Yes	Positive
Sus_scrofa	Suidae	Cetartiodactyla	R_164	2002	Producers	MO	Strong	Low	(10) Indirect impacts through interactions with other taxa	Indirect	Oceania	Yes	Positive
Rangifer_tarandus	Cervidae	Cetartiodactyla	R_165	1987	Producers	MO	Strong	Medium	Grazing/herbivory/browsing	Direct	North and Central America	Yes	Negative
Rangifer_tarandus	Cervidae	Cetartiodactyla	R_165	1987	Producers	MO	Strong	Medium	Grazing/herbivory/browsing	Direct	North and Central America	Yes	Negative
Sus_scrofa	Suidae	Cetartiodactyla	R_166	1995	Producers	MN	Weak	Low	Direct physical disturbance	Direct	North and Central America	No	Negative
Sus_scrofa	Suidae	Cetartiodactyla	R_166	1995	Producers	MN	Weak	Low	Direct physical disturbance	Direct	North and Central America	No	Negative
Sus_scrofa	Suidae	Cetartiodactyla	R_166	1995	Producers	MN	Weak	Low	Direct physical disturbance	Direct	North and Central America	No	Negative
Sus_scrofa	Suidae	Cetartiodactyla	R_166	1995	Producers	MN	Weak	Low	Direct physical disturbance	Direct	North and Central America	No	Negative
Sus_scrofa	Suidae	Cetartiodactyla	R_166	1995	Producers	MN	Weak	Low	Direct physical disturbance	Direct	North and Central America	No	Negative
Sus_scrofa	Suidae	Cetartiodactyla	R_166	1995	Producers	MN	Weak	Low	Direct physical disturbance	Direct	North and Central America	No	Negative
Sus_scrofa	Suidae	Cetartiodactyla	R_166	1995	Producers	MN	Weak	Low	Direct physical disturbance	Direct	North and Central America	No	Negative
Sus_scrofa	Suidae	Cetartiodactyla	R_166	1995	Producers	MN	Weak	Low	Direct physical disturbance	Direct	North and Central America	No	Negative
Sus_scrofa	Suidae	Cetartiodactyla	R_166	1995	Producers	MN	Weak	Low	Direct physical disturbance	Direct	North and Central America	No	Negative
Sus_scrofa	Suidae	Cetartiodactyla	R_167	2013	Producers	MO	Strong	Low	Direct physical disturbance	Direct	Oceania	Yes	Negative
Sus_scrofa	Suidae	Cetartiodactyla	R_167	2013	Producers	MO	Strong	Low	Direct physical disturbance	Direct	Oceania	Yes	Negative
Sus_scrofa	Suidae	Cetartiodactyla	R_167	2013	Producers	MO	Strong	Low	Direct physical disturbance	Direct	Oceania	Yes	Negative
Sus_scrofa	Suidae	Cetartiodactyla	R_167	2013	Producers	MO	Strong	Low	Direct physical disturbance	Direct	Oceania	Yes	Negative
Sus_scrofa	Suidae	Cetartiodactyla	R_167	2013	Producers	MO	Strong	Low	Direct physical disturbance	Direct	Oceania	Yes	Negative
Sus_scrofa	Suidae	Cetartiodactyla	R_167	2013	Producers	MO	Strong	Low	Direct physical disturbance	Direct	Oceania	Yes	Negative
Sus_scrofa	Suidae	Cetartiodactyla	R_167	2013	Producers	MO	Strong	Low	Direct physical disturbance	Direct	Oceania	Yes	Negative
Sus_scrofa	Suidae	Cetartiodactyla	R_167	2013	Producers	MO	Strong	Low	Direct physical disturbance	Direct	Oceania	Yes	Negative
Sus_scrofa	Suidae	Cetartiodactyla	R_167	2013	Producers	MO	Strong	Low	Direct physical disturbance	Direct	Oceania	Yes	Negative
Sus_scrofa	Suidae	Cetartiodactyla	R_167	2013	Producers	MO	Strong	Low	Direct physical disturbance	Direct	Oceania	Yes	Negative
Sus_scrofa	Suidae	Cetartiodactyla	R_167	2013	Producers	MO	Strong	Low	Direct physical disturbance	Direct	Oceania	Yes	Negative
Sus_scrofa	Suidae	Cetartiodactyla	R_167	2013	Producers	MO	Strong	Low	Direct physical disturbance	Direct	Oceania	Yes	Negative
Sus_scrofa	Suidae	Cetartiodactyla	R_167	2013	Producers	MO	Strong	Low	Direct physical disturbance	Direct	Oceania	Yes	Negative
Equus_caballus	Equidae	Perissodactyla	R_168	2006	Producers	MN	Weak	Low	Grazing/herbivory/browsing	Direct	Europe	No	Negative
Bos_taurus	Bovidae	Cetartiodactyla	R_169	2009	Secondary_consumers	MN	Weak	Medium	(1) Provision of trophic resources	Direct	South_America	No	Positive
Capra_hircus	Bovidae	Cetartiodactyla	R_169	2009	Secondary_consumers	MN	Weak	Medium	(1) Provision of trophic resources	Direct	South_America	No	Positive
Cervus_elaphus	Cervidae	Cetartiodactyla	R_169	2009	Secondary_consumers	MN	Weak	Medium	(1) Provision of trophic resources	Direct	South_America	No	Positive
Equus_caballus	Equidae	Perissodactyla	R_169	2009	Secondary_consumers	MN	Weak	Medium	(1) Provision of trophic resources	Direct	South_America	No	Positive
Ovis_aries	Bovidae	Cetartiodactyla	R_169	2009	Secondary_consumers	MN	Weak	Medium	(1) Provision of trophic resources	Direct	South_America	No	Positive
Sus_scrofa	Suidae	Cetartiodactyla	R_169	2009	Secondary_consumers	MC	Weak	High	(1) Provision of trophic resources	Direct	South_America	No	Positive
Cervus_nippon	Cervidae	Cetartiodactyla	R_17	1981	Primary_consumers	MO	Strong	Low	Hybridisation	Direct	Europe	No	Negative
Cervus_nippon	Cervidae	Cetartiodactyla	R_17	1981	Primary_consumers	MR	Strong	Low	Hybridisation	Direct	Europe	No	Negative
Rangifer_tarandus	Cervidae	Cetartiodactyla	R_170	1987	Producers	MO	Strong	Medium	Grazing/herbivory/browsing	Direct	South America	Yes	Negative
Rangifer_tarandus	Cervidae	Cetartiodactyla	R_170	1987	Producers	MO	Strong	Medium	Grazing/herbivory/browsing	Direct	South America	Yes	Negative
Rangifer_tarandus	Cervidae	Cetartiodactyla	R_170	1987	Producers	MO	Strong	Medium	Grazing/herbivory/browsing	Direct	South America	Yes	Negative
Rangifer_tarandus	Cervidae	Cetartiodactyla	R_170	1987	Producers	MO	Strong	Medium	Grazing/herbivory/browsing	Direct	South America	Yes	Negative
Rangifer_tarandus	Cervidae	Cetartiodactyla	R_170	1987	Producers	MO	Strong	Medium	Grazing/herbivory/browsing	Direct	South America	Yes	Negative
Rangifer_tarandus	Cervidae	Cetartiodactyla	R_170	1987	Producers	MO	Strong	Medium	Grazing/herbivory/browsing	Direct	South America	Yes	Negative
Rangifer_tarandus	Cervidae	Cetartiodactyla	R_170	1987	Producers	MN	Weak	Low	(10) Indirect impacts through interactions with other taxa	Indirect	South_America	Yes	Positive
Rangifer_tarandus	Cervidae	Cetartiodactyla	R_170	1987	Producers	MC	Weak	Low	(10) Indirect impacts through interactions with other taxa	Indirect	South_America	Yes	Positive
Rangifer_tarandus	Cervidae	Cetartiodactyla	R_170	1987	Producers	MC	Weak	Low	(10) Indirect impacts through interactions with other taxa	Indirect	South_America	Yes	Positive
Rangifer_tarandus	Cervidae	Cetartiodactyla	R_171	1981	Producers	MO	Strong	Low	Grazing/herbivory/browsing	Direct	South America	Yes	Negative
Rangifer_tarandus	Cervidae	Cetartiodactyla	R_171	1981	Producers	MO	Strong	Low	Grazing/herbivory/browsing	Direct	South America	Yes	Negative
Dama_dama	Cervidae	Cetartiodactyla	R_172	2016	Producers	MO	Strong	Medium	Grazing/herbivory/browsing	Direct	Europe	No	Negative
Equus_caballus	Equidae	Perissodactyla	R_173	2002	Secondary_consumers	MO	Strong	High	Chemical, physical or structural impact on ecosystems	Indirect	North and Central America	Yes	Negative
Equus_caballus	Equidae	Perissodactyla	R_173	2002	Secondary_consumers	MO	Strong	High	Chemical, physical or structural impact on ecosystems	Indirect	North and Central America	Yes	Negative
Equus_caballus	Equidae	Perissodactyla	R_173	2002	Secondary_consumers	MO	Strong	High	Chemical, physical or structural impact on ecosystems	Indirect	North and Central America	Yes	Negative
Equus_caballus	Equidae	Perissodactyla	R_173	2002	Secondary_consumers	MO	Strong	High	Chemical, physical or structural impact on ecosystems	Indirect	North and Central America	Yes	Negative
Equus_caballus	Equidae	Perissodactyla	R_173	2002	Secondary_consumers	MO	Strong	High	(10) Indirect impacts through interactions with other taxa	Indirect	North_and_Central_America	Yes	Positive
Equus_caballus	Equidae	Perissodactyla	R_173	2002	Secondary_consumers	MO	Strong	High	(10) Indirect impacts through interactions with other taxa	Indirect	North_and_Central_America	Yes	Positive
Bos_taurus	Bovidae	Cetartiodactyla	R_174	2006	Producers	MO	Strong	Medium	Direct physical disturbance	Direct	Oceania	No	Negative
Bubalus_bubalis	Bovidae	Cetartiodactyla	R_174	2006	Producers	MO	Strong	Medium	Direct physical disturbance	Direct	Oceania	No	Negative
Sus_scrofa	Suidae	Cetartiodactyla	R_174	2006	Producers	MO	Strong	Medium	Direct physical disturbance	Direct	Oceania	No	Negative
Sus_scrofa	Suidae	Cetartiodactyla	R_175	1995	Producers	MN	Weak	Low	Direct physical disturbance	Direct	North and Central America	Yes	Negative
Sus_scrofa	Suidae	Cetartiodactyla	R_175	1995	Producers	MN	Weak	Low	Direct physical disturbance	Direct	North and Central America	Yes	Negative
Sus_scrofa	Suidae	Cetartiodactyla	R_175	1995	Producers	MN	Weak	Low	Direct physical disturbance	Direct	North and Central America	Yes	Negative
Sus_scrofa	Suidae	Cetartiodactyla	R_175	1995	Producers	MN	Weak	Low	Direct physical disturbance	Direct	North and Central America	Yes	Negative
Sus_scrofa	Suidae	Cetartiodactyla	R_175	1995	Producers	MN	Weak	Low	Direct physical disturbance	Direct	North and Central America	Yes	Negative
Sus_scrofa	Suidae	Cetartiodactyla	R_175	1995	Producers	MN	Weak	Low	Direct physical disturbance	Direct	North and Central America	Yes	Negative
Sus_scrofa	Suidae	Cetartiodactyla	R_175	1995	Producers	MN	Weak	Low	Direct physical disturbance	Direct	North and Central America	Yes	Negative
Sus_scrofa	Suidae	Cetartiodactyla	R_175	1995	Producers	MN	Weak	Low	Direct physical disturbance	Direct	North and Central America	Yes	Negative
Sus_scrofa	Suidae	Cetartiodactyla	R_175	1995	Producers	MN	Weak	Low	Direct physical disturbance	Direct	North and Central America	Yes	Negative
Sus_scrofa	Suidae	Cetartiodactyla	R_175	1995	Producers	MN	Weak	Low	Direct physical disturbance	Direct	North and Central America	Yes	Negative
Cervus_nippon	Cervidae	Cetartiodactyla	R_176	1998	Primary_consumers	MR	Strong	Low	Hybridisation	Direct	Europe	Yes	Negative
Cervus_nippon	Cervidae	Cetartiodactyla	R_176	1998	Primary_consumers	MC	Weak	Low	Hybridisation	Direct	Europe	Yes	Negative
Cervus_nippon	Cervidae	Cetartiodactyla	R_176	1998	Primary_consumers	MC	Weak	Low	(3) Hybridisation	Direct	Europe	Yes	Positive
Cervus_nippon	Cervidae	Cetartiodactyla	R_177	1975	Primary_consumers	MR	Strong	Low	Hybridisation	Direct	Europe	Yes	Negative
Cervus_nippon	Cervidae	Cetartiodactyla	R_177	1975	Primary_consumers	MR	Strong	Low	Hybridisation	Direct	Europe	Yes	Negative
Equus_caballus	Equidae	Perissodactyla	R_178	2012	Producers	MC	Weak	Low	Grazing/herbivory/browsing	Direct	South America	No	Negative
Equus_caballus	Equidae	Perissodactyla	R_178	2012	Producers	MC	Weak	Low	Grazing/herbivory/browsing	Direct	South America	No	Negative
Equus_caballus	Equidae	Perissodactyla	R_178	2012	Producers	MC	Weak	Low	Grazing/herbivory/browsing	Direct	South America	No	Negative
Cervus_elaphus	Cervidae	Cetartiodactyla	R_18	1967	Producers	MN	Weak	Low	Grazing/herbivory/browsing	Direct	Oceania	Yes	Negative
Cervus_elaphus	Cervidae	Cetartiodactyla	R_18	1967	Producers	MN	Weak	Low	Grazing/herbivory/browsing	Direct	Oceania	Yes	Negative
Sus_scrofa	Suidae	Cetartiodactyla	R_180	1974	Primary_consumers	MN	Weak	Medium	Predation	Direct	South America	Yes	Negative
Cervus_nippon	Cervidae	Cetartiodactyla	R_181	2014	Primary_consumers	MO	Strong	Low	Hybridisation	Direct	Europe	No	Negative
Bos_taurus	Bovidae	Cetartiodactyla	R_183	2011	Producers	MN	Weak	Low	Grazing/herbivory/browsing	Direct	South America	No	Negative
Equus_asinus	Equidae	Perissodactyla	R_183	2011	Producers	MN	Weak	Low	Grazing/herbivory/browsing	Direct	North and Central America	No	Negative
Bison_bison	Bovidae	Cetartiodactyla	R_184	2007	Producers	MN	Weak	Medium	Direct physical disturbance	Direct	North and Central America	Yes	Negative
Odocoileus_hemionus	Cervidae	Cetartiodactyla	R_184	2007	Producers	MN	Weak	Medium	Grazing/herbivory/browsing	Direct	North and Central America	Yes	Negative
Odocoileus_hemionus	Cervidae	Cetartiodactyla	R_184	2007	Producers	MN	Weak	Medium	Grazing/herbivory/browsing	Direct	North and Central America	Yes	Negative
Odocoileus_hemionus	Cervidae	Cetartiodactyla	R_184	2007	Producers	MN	Weak	Medium	Grazing/herbivory/browsing	Direct	North and Central America	Yes	Negative
Cervus_elaphus	Cervidae	Cetartiodactyla	R_185	1989	Producers	MO	Strong	Medium	Grazing/herbivory/browsing	Direct	Oceania	Yes	Negative
Cervus_elaphus	Cervidae	Cetartiodactyla	R_185	1989	Producers	MO	Strong	Medium	Grazing/herbivory/browsing	Direct	Oceania	Yes	Negative
Cervus_elaphus	Cervidae	Cetartiodactyla	R_185	1989	Producers	MO	Strong	Medium	Grazing/herbivory/browsing	Direct	Oceania	Yes	Negative
Cervus_elaphus	Cervidae	Cetartiodactyla	R_185	1989	Producers	MO	Strong	Medium	Grazing/herbivory/browsing	Direct	Oceania	Yes	Negative
Cervus_elaphus	Cervidae	Cetartiodactyla	R_185	1989	Producers	MO	Strong	Medium	Grazing/herbivory/browsing	Direct	Oceania	Yes	Negative
Cervus_elaphus	Cervidae	Cetartiodactyla	R_185	1989	Producers	MO	Strong	Medium	Grazing/herbivory/browsing	Direct	Oceania	Yes	Negative
Cervus_elaphus	Cervidae	Cetartiodactyla	R_185	1989	Producers	MO	Strong	Medium	Grazing/herbivory/browsing	Direct	Oceania	Yes	Negative
Cervus_elaphus	Cervidae	Cetartiodactyla	R_185	1989	Producers	MO	Strong	Medium	Grazing/herbivory/browsing	Direct	Oceania	Yes	Negative
Cervus_elaphus	Cervidae	Cetartiodactyla	R_185	1989	Producers	MO	Strong	Medium	Grazing/herbivory/browsing	Direct	Oceania	Yes	Negative
Cervus_elaphus	Cervidae	Cetartiodactyla	R_185	1989	Producers	MO	Strong	Medium	Grazing/herbivory/browsing	Direct	Oceania	Yes	Negative
Cervus_elaphus	Cervidae	Cetartiodactyla	R_185	1989	Producers	MO	Strong	Medium	Grazing/herbivory/browsing	Direct	Oceania	Yes	Negative
Cervus_elaphus	Cervidae	Cetartiodactyla	R_185	1989	Producers	MO	Strong	Medium	Grazing/herbivory/browsing	Direct	Oceania	Yes	Negative
Cervus_elaphus	Cervidae	Cetartiodactyla	R_185	1989	Producers	MO	Strong	Medium	Grazing/herbivory/browsing	Direct	Oceania	Yes	Negative
Cervus_elaphus	Cervidae	Cetartiodactyla	R_185	1989	Producers	MO	Strong	Medium	Grazing/herbivory/browsing	Direct	Oceania	Yes	Negative
Cervus_elaphus	Cervidae	Cetartiodactyla	R_185	1989	Producers	MO	Strong	Medium	Grazing/herbivory/browsing	Direct	Oceania	Yes	Negative
Cervus_elaphus	Cervidae	Cetartiodactyla	R_185	1989	Producers	MO	Strong	Medium	Grazing/herbivory/browsing	Direct	Oceania	Yes	Negative
Cervus_elaphus	Cervidae	Cetartiodactyla	R_185	1989	Producers	MO	Strong	Medium	Grazing/herbivory/browsing	Direct	Oceania	Yes	Negative
Cervus_elaphus	Cervidae	Cetartiodactyla	R_185	1989	Producers	MO	Strong	Medium	Grazing/herbivory/browsing	Direct	Oceania	Yes	Negative
Cervus_elaphus	Cervidae	Cetartiodactyla	R_185	1989	Producers	MN	Weak	Medium	Grazing/herbivory/browsing	Direct	Oceania	Yes	Negative
Cervus_elaphus	Cervidae	Cetartiodactyla	R_185	1989	Producers	MN	Weak	Medium	Grazing/herbivory/browsing	Direct	Oceania	Yes	Negative
Cervus_elaphus	Cervidae	Cetartiodactyla	R_185	1989	Producers	MN	Weak	Medium	Grazing/herbivory/browsing	Direct	Oceania	Yes	Negative
Cervus_elaphus	Cervidae	Cetartiodactyla	R_185	1989	Producers	MN	Weak	Medium	Grazing/herbivory/browsing	Direct	Oceania	Yes	Negative
Cervus_elaphus	Cervidae	Cetartiodactyla	R_185	1989	Producers	MN	Weak	Medium	Grazing/herbivory/browsing	Direct	Oceania	Yes	Negative
Cervus_elaphus	Cervidae	Cetartiodactyla	R_185	1989	Producers	MN	Weak	Medium	Grazing/herbivory/browsing	Direct	Oceania	Yes	Negative
Cervus_elaphus	Cervidae	Cetartiodactyla	R_185	1989	Producers	MN	Weak	Medium	Grazing/herbivory/browsing	Direct	Oceania	Yes	Negative
Cervus_elaphus	Cervidae	Cetartiodactyla	R_185	1989	Producers	MN	Weak	Medium	Grazing/herbivory/browsing	Direct	Oceania	Yes	Negative
Cervus_elaphus	Cervidae	Cetartiodactyla	R_185	1989	Producers	MO	Strong	Medium	(10) Indirect impacts through interactions with other taxa	Indirect	Oceania	Yes	Positive
Cervus_elaphus	Cervidae	Cetartiodactyla	R_185	1989	Producers	MO	Strong	Medium	(10) Indirect impacts through interactions with other taxa	Indirect	Oceania	Yes	Positive
Cervus_elaphus	Cervidae	Cetartiodactyla	R_185	1989	Producers	MN	Weak	Medium	(10) Indirect impacts through interactions with other taxa	Indirect	Oceania	Yes	Positive
Cervus_elaphus	Cervidae	Cetartiodactyla	R_185	1989	Producers	MO	Strong	Medium	(10) Indirect impacts through interactions with other taxa	Indirect	Oceania	Yes	Positive
Cervus_elaphus	Cervidae	Cetartiodactyla	R_185	1989	Producers	MO	Strong	Medium	(10) Indirect impacts through interactions with other taxa	Indirect	Oceania	Yes	Positive
Cervus_elaphus	Cervidae	Cetartiodactyla	R_185	1989	Producers	MO	Strong	Medium	(10) Indirect impacts through interactions with other taxa	Indirect	Oceania	Yes	Positive
Cervus_elaphus	Cervidae	Cetartiodactyla	R_185	1989	Producers	MO	Strong	Medium	(10) Indirect impacts through interactions with other taxa	Indirect	Oceania	Yes	Positive
Cervus_elaphus	Cervidae	Cetartiodactyla	R_185	1989	Producers	MO	Strong	Medium	(10) Indirect impacts through interactions with other taxa	Indirect	Oceania	Yes	Positive
Cervus_elaphus	Cervidae	Cetartiodactyla	R_185	1989	Producers	MO	Strong	Medium	(10) Indirect impacts through interactions with other taxa	Indirect	Oceania	Yes	Positive
Cervus_elaphus	Cervidae	Cetartiodactyla	R_185	1989	Producers	MO	Strong	Medium	(10) Indirect impacts through interactions with other taxa	Indirect	Oceania	Yes	Positive
Cervus_elaphus	Cervidae	Cetartiodactyla	R_185	1989	Producers	MO	Strong	Medium	(10) Indirect impacts through interactions with other taxa	Indirect	Oceania	Yes	Positive
Cervus_elaphus	Cervidae	Cetartiodactyla	R_185	1989	Producers	MO	Strong	Medium	(10) Indirect impacts through interactions with other taxa	Indirect	Oceania	Yes	Positive
Cervus_elaphus	Cervidae	Cetartiodactyla	R_185	1989	Producers	MO	Strong	Medium	(10) Indirect impacts through interactions with other taxa	Indirect	Oceania	Yes	Positive
Cervus_elaphus	Cervidae	Cetartiodactyla	R_185	1989	Producers	MO	Strong	Medium	(10) Indirect impacts through interactions with other taxa	Indirect	Oceania	Yes	Positive
Cervus_elaphus	Cervidae	Cetartiodactyla	R_185	1989	Producers	MO	Strong	Medium	(10) Indirect impacts through interactions with other taxa	Indirect	Oceania	Yes	Positive
Equus_asinus	Equidae	Perissodactyla	R_186	2008	Primary_consumers	MO	Strong	Low	Competition	Indirect	North and Central America	No	Negative
Odocoileus_hemionus	Cervidae	Cetartiodactyla	R_187	1999	Secondary_consumers	MO	Strong	Low	Chemical, physical or structural impact on ecosystems	Indirect	North and Central America	Yes	Negative
Odocoileus_hemionus	Cervidae	Cetartiodactyla	R_187	1999	Secondary_consumers	MO	Strong	Low	Chemical, physical or structural impact on ecosystems	Indirect	North and Central America	Yes	Negative
Odocoileus_hemionus	Cervidae	Cetartiodactyla	R_187	1999	Producers	MO	Strong	Medium	Grazing/herbivory/browsing	Direct	North and Central America	Yes	Negative
Odocoileus_hemionus	Cervidae	Cetartiodactyla	R_187	1999	Producers	MO	Strong	Medium	Grazing/herbivory/browsing	Direct	North and Central America	Yes	Negative
Odocoileus_hemionus	Cervidae	Cetartiodactyla	R_187	1999	Producers	MO	Strong	Medium	Grazing/herbivory/browsing	Direct	North and Central America	Yes	Negative
Odocoileus_hemionus	Cervidae	Cetartiodactyla	R_187	1999	Producers	MN	Weak	Medium	Grazing/herbivory/browsing	Direct	North and Central America	Yes	Negative
Odocoileus_hemionus	Cervidae	Cetartiodactyla	R_187	1999	Secondary_consumers	MO	Strong	Low	Chemical, physical or structural impact on ecosystems	Indirect	North and Central America	Yes	Negative
Odocoileus_hemionus	Cervidae	Cetartiodactyla	R_187	1999	Secondary_consumers	MO	Strong	Low	Chemical, physical or structural impact on ecosystems	Indirect	North and Central America	Yes	Negative
Odocoileus_hemionus	Cervidae	Cetartiodactyla	R_187	1999	Secondary_consumers	MO	Strong	Low	Chemical, physical or structural impact on ecosystems	Indirect	North and Central America	Yes	Negative
Odocoileus_hemionus	Cervidae	Cetartiodactyla	R_187	1999	Producers	MN	Weak	Low	(10) Indirect impacts through interactions with other taxa	Indirect	North_and_Central_America	Yes	Positive
Odocoileus_hemionus	Cervidae	Cetartiodactyla	R_187	1999	Producers	MN	Weak	Low	(10) Indirect impacts through interactions with other taxa	Indirect	North_and_Central_America	Yes	Positive
Odocoileus_hemionus	Cervidae	Cetartiodactyla	R_187	1999	Producers	MN	Weak	Medium	(5) Dispersal facilitation	Direct	North_and_Central_America	Yes	Positive
Odocoileus_hemionus	Cervidae	Cetartiodactyla	R_187	1999	Producers	MN	Weak	Medium	(5) Dispersal facilitation	Direct	North_and_Central_America	Yes	Positive
Odocoileus_hemionus	Cervidae	Cetartiodactyla	R_188	2010	Producers	MO	Strong	Medium	Grazing/herbivory/browsing	Direct	North and Central America	Yes	Negative
Odocoileus_hemionus	Cervidae	Cetartiodactyla	R_188	2010	Producers	MO	Strong	Medium	Grazing/herbivory/browsing	Direct	North and Central America	Yes	Negative
Odocoileus_hemionus	Cervidae	Cetartiodactyla	R_188	2010	Producers	MO	Strong	Medium	Grazing/herbivory/browsing	Direct	North and Central America	Yes	Negative
Odocoileus_hemionus	Cervidae	Cetartiodactyla	R_188	2010	Producers	MO	Strong	Medium	Grazing/herbivory/browsing	Direct	North and Central America	Yes	Negative
Odocoileus_hemionus	Cervidae	Cetartiodactyla	R_188	2010	Producers	MO	Strong	Medium	Grazing/herbivory/browsing	Direct	North and Central America	Yes	Negative
Odocoileus_hemionus	Cervidae	Cetartiodactyla	R_188	2010	Producers	MO	Strong	Medium	Grazing/herbivory/browsing	Direct	North and Central America	Yes	Negative
Odocoileus_hemionus	Cervidae	Cetartiodactyla	R_188	2010	Producers	MO	Strong	Medium	Grazing/herbivory/browsing	Direct	North and Central America	Yes	Negative
Odocoileus_hemionus	Cervidae	Cetartiodactyla	R_188	2010	Producers	MO	Strong	Medium	Grazing/herbivory/browsing	Direct	North and Central America	Yes	Negative
Odocoileus_hemionus	Cervidae	Cetartiodactyla	R_188	2010	Producers	MO	Strong	Medium	Grazing/herbivory/browsing	Direct	North and Central America	Yes	Negative
Odocoileus_hemionus	Cervidae	Cetartiodactyla	R_188	2010	Producers	MO	Strong	Medium	Grazing/herbivory/browsing	Direct	North and Central America	Yes	Negative
Odocoileus_hemionus	Cervidae	Cetartiodactyla	R_188	2010	Producers	MO	Strong	Medium	Grazing/herbivory/browsing	Direct	North and Central America	Yes	Negative
Odocoileus_hemionus	Cervidae	Cetartiodactyla	R_188	2010	Producers	MO	Strong	Medium	Grazing/herbivory/browsing	Direct	North and Central America	Yes	Negative
Odocoileus_hemionus	Cervidae	Cetartiodactyla	R_188	2010	Producers	MO	Strong	Medium	Grazing/herbivory/browsing	Direct	North and Central America	Yes	Negative
Odocoileus_hemionus	Cervidae	Cetartiodactyla	R_188	2010	Producers	MO	Strong	Medium	Grazing/herbivory/browsing	Direct	North and Central America	Yes	Negative
Odocoileus_hemionus	Cervidae	Cetartiodactyla	R_188	2010	Producers	MO	Strong	Medium	Grazing/herbivory/browsing	Direct	North and Central America	Yes	Negative
Odocoileus_hemionus	Cervidae	Cetartiodactyla	R_188	2010	Producers	MO	Strong	Medium	Grazing/herbivory/browsing	Direct	North and Central America	Yes	Negative
Odocoileus_hemionus	Cervidae	Cetartiodactyla	R_188	2010	Producers	MO	Strong	Medium	Grazing/herbivory/browsing	Direct	North and Central America	Yes	Negative
Odocoileus_hemionus	Cervidae	Cetartiodactyla	R_188	2010	Producers	MO	Strong	Medium	Grazing/herbivory/browsing	Direct	North and Central America	Yes	Negative
Odocoileus_hemionus	Cervidae	Cetartiodactyla	R_188	2010	Producers	MN	Weak	Medium	Grazing/herbivory/browsing	Direct	North and Central America	Yes	Negative
Odocoileus_hemionus	Cervidae	Cetartiodactyla	R_188	2010	Producers	MN	Weak	Medium	Grazing/herbivory/browsing	Direct	North and Central America	Yes	Negative
Odocoileus_hemionus	Cervidae	Cetartiodactyla	R_188	2010	Producers	MN	Weak	Medium	Grazing/herbivory/browsing	Direct	North and Central America	Yes	Negative
Odocoileus_hemionus	Cervidae	Cetartiodactyla	R_188	2010	Producers	MN	Weak	Medium	Grazing/herbivory/browsing	Direct	North and Central America	Yes	Negative
Cervus_nippon	Cervidae	Cetartiodactyla	R_189	2009	Primary_consumers	MN	Weak	Low	Hybridisation	Direct	Europe	Yes	Negative
Cervus_nippon	Cervidae	Cetartiodactyla	R_189	2009	Primary_consumers	MC	Weak	Medium	Hybridisation	Direct	Europe	Yes	Negative
Cervus_nippon	Cervidae	Cetartiodactyla	R_189	2009	Primary_consumers	MC	Weak	Medium	(3) Hybridisation	Direct	Europe	Yes	Positive
Equus_caballus	Equidae	Perissodactyla	R_19	2000	Primary_consumers	MO	Strong	Low	Chemical, physical or structural impact on ecosystems	Indirect	North and Central America	No	Negative
Equus_caballus	Equidae	Perissodactyla	R_19	2000	Producers	MO	Strong	Low	Grazing/herbivory/browsing	Direct	North and Central America	No	Negative
Equus_caballus	Equidae	Perissodactyla	R_19	2000	Primary_consumers	MO	Strong	Low	Chemical, physical or structural impact on ecosystems	Indirect	North and Central America	No	Negative
Equus_caballus	Equidae	Perissodactyla	R_19	2000	Secondary_consumers	MO	Strong	Low	Chemical, physical or structural impact on ecosystems	Indirect	North and Central America	No	Negative
Equus_caballus	Equidae	Perissodactyla	R_19	2000	Primary_consumers	MO	Strong	Low	Chemical, physical or structural impact on ecosystems	Indirect	North and Central America	No	Negative
Equus_caballus	Equidae	Perissodactyla	R_19	2000	Primary_consumers	MO	Strong	Low	Chemical, physical or structural impact on ecosystems	Indirect	North and Central America	No	Negative
Axis_axis	Cervidae	Cetartiodactyla	R_190	2003	Producers	MN	Weak	Low	Grazing/herbivory/browsing	Direct	North and Central America	Yes	Negative
Sus_scrofa	Suidae	Cetartiodactyla	R_191	2001	Secondary_consumers	MO	Strong	Low	Predation	Direct	Oceania	Yes	Negative
Sus_scrofa	Suidae	Cetartiodactyla	R_191	2001	Secondary_consumers	MO	Strong	Low	Predation	Direct	Oceania	Yes	Negative
Axis_axis	Cervidae	Cetartiodactyla	R_192	1993	Producers	MO	Strong	Low	Grazing/herbivory/browsing	Direct	North and Central America	Yes	Negative
Ovis_orientalis	Bovidae	Cetartiodactyla	R_192	1993	Producers	MO	Strong	Low	Grazing/herbivory/browsing	Direct	North and Central America	Yes	Negative
Odocoileus_virginianus	Cervidae	Cetartiodactyla	R_193	2009	Producers	MN	Weak	Medium	Grazing/herbivory/browsing	Direct	Europe	Yes	Negative
Odocoileus_virginianus	Cervidae	Cetartiodactyla	R_193	2009	Producers	MN	Weak	Medium	Grazing/herbivory/browsing	Direct	Europe	Yes	Negative
Odocoileus_virginianus	Cervidae	Cetartiodactyla	R_193	2009	Producers	MN	Weak	Medium	Grazing/herbivory/browsing	Direct	Europe	Yes	Negative
Odocoileus_virginianus	Cervidae	Cetartiodactyla	R_193	2009	Producers	MN	Weak	Medium	Grazing/herbivory/browsing	Direct	Europe	Yes	Negative
Odocoileus_virginianus	Cervidae	Cetartiodactyla	R_193	2009	Producers	MN	Weak	Medium	Grazing/herbivory/browsing	Direct	Europe	Yes	Negative
Bubalus_bubalis	Bovidae	Cetartiodactyla	R_194	2012	Producers	MO	Strong	Medium	Direct physical disturbance	Direct	South America	No	Negative
Bubalus_bubalis	Bovidae	Cetartiodactyla	R_194	2012	Producers	MO	Strong	Medium	Direct physical disturbance	Direct	South America	No	Negative
Bubalus_bubalis	Bovidae	Cetartiodactyla	R_194	2012	Producers	MO	Strong	Medium	Direct physical disturbance	Direct	South America	No	Negative
Bubalus_bubalis	Bovidae	Cetartiodactyla	R_194	2012	Producers	MO	Strong	Medium	Direct physical disturbance	Direct	South America	No	Negative
Bubalus_bubalis	Bovidae	Cetartiodactyla	R_194	2012	Producers	MO	Strong	Medium	Direct physical disturbance	Direct	South America	No	Negative
Bubalus_bubalis	Bovidae	Cetartiodactyla	R_194	2012	Producers	MO	Strong	Medium	Direct physical disturbance	Direct	South America	No	Negative
Bubalus_bubalis	Bovidae	Cetartiodactyla	R_194	2012	Producers	MO	Strong	Medium	Direct physical disturbance	Direct	South America	No	Negative
Bubalus_bubalis	Bovidae	Cetartiodactyla	R_194	2012	Producers	MO	Strong	Medium	Direct physical disturbance	Direct	South America	No	Negative
Bubalus_bubalis	Bovidae	Cetartiodactyla	R_194	2012	Producers	MO	Strong	Medium	Direct physical disturbance	Direct	South America	No	Negative
Bubalus_bubalis	Bovidae	Cetartiodactyla	R_194	2012	Producers	MO	Strong	Medium	Direct physical disturbance	Direct	South America	No	Negative
Bubalus_bubalis	Bovidae	Cetartiodactyla	R_194	2012	Producers	MO	Strong	Medium	Direct physical disturbance	Direct	South America	No	Negative
Bubalus_bubalis	Bovidae	Cetartiodactyla	R_194	2012	Producers	MO	Strong	Medium	Direct physical disturbance	Direct	South America	No	Negative
Bubalus_bubalis	Bovidae	Cetartiodactyla	R_194	2012	Producers	MO	Strong	Medium	Direct physical disturbance	Direct	South America	No	Negative
Bubalus_bubalis	Bovidae	Cetartiodactyla	R_194	2012	Producers	MO	Strong	Medium	Direct physical disturbance	Direct	South America	No	Negative
Bubalus_bubalis	Bovidae	Cetartiodactyla	R_194	2012	Producers	MO	Strong	Medium	Direct physical disturbance	Direct	South America	No	Negative
Bos_taurus	Bovidae	Cetartiodactyla	R_195	1995	Producers	MO	Strong	Medium	Grazing/herbivory/browsing; Direct physical disturbance	Direct	Antarctic	Yes	Negative
Sus_scrofa	Suidae	Cetartiodactyla	R_196	1985	Secondary_consumers	MN	Weak	Low	Predation	Direct	Oceania	Yes	Negative
Sus_scrofa	Suidae	Cetartiodactyla	R_196	1985	Secondary_consumers	MN	Weak	Low	Direct physical disturbance	Direct	Oceania	Yes	Negative
Sus_scrofa	Suidae	Cetartiodactyla	R_197	2008	Decomposers	MC	Weak	Medium	Chemical, physical or structural impact on ecosystems	Indirect	Oceania	No	Negative
Sus_scrofa	Suidae	Cetartiodactyla	R_197	2008	Producers	MN	Weak	Low	Direct physical disturbance	Direct	Oceania	No	Negative
Axis_axis	Cervidae	Cetartiodactyla	R_198	2013	Secondary_consumers	MO	Strong	Medium	(10) Indirect impacts through interactions with other taxa	Indirect	Asia	Yes	Positive
Axis_axis	Cervidae	Cetartiodactyla	R_199	2016	Producers	MO	Strong	Low	Grazing/herbivory/browsing	Direct	Asia	Yes	Negative
Axis_axis	Cervidae	Cetartiodactyla	R_199	2016	Secondary_consumers	MC	Weak	Medium	Chemical, physical or structural impact on ecosystems	Indirect	Asia	Yes	Negative
Axis_axis	Cervidae	Cetartiodactyla	R_199	2016	Secondary_consumers	MO	Strong	Medium	Chemical, physical or structural impact on ecosystems	Indirect	Asia	Yes	Negative
Axis_axis	Cervidae	Cetartiodactyla	R_199	2016	Secondary_consumers	MO	Strong	Medium	Chemical, physical or structural impact on ecosystems	Indirect	Asia	Yes	Negative
Axis_axis	Cervidae	Cetartiodactyla	R_199	2016	Secondary_consumers	MO	Strong	Medium	Chemical, physical or structural impact on ecosystems	Indirect	Asia	Yes	Negative
Axis_axis	Cervidae	Cetartiodactyla	R_2	2004	Producers	MN	Weak	Low	Grazing/herbivory/browsing	Direct	Asia	Yes	Negative
Elephas_maximus	Elephantidae	Proboscidea	R_2	2004	Producers	MO	Strong	Medium	Grazing/herbivory/browsing; Direct physical disturbance	Direct	Asia	Yes	Negative
Elephas_maximus	Elephantidae	Proboscidea	R_2	2004	Producers	MO	Strong	Medium	Grazing/herbivory/browsing; Direct physical disturbance	Direct	Asia	Yes	Negative
Elephas_maximus	Elephantidae	Proboscidea	R_2	2004	Producers	MO	Strong	Medium	Grazing/herbivory/browsing; Direct physical disturbance	Direct	Asia	Yes	Negative
Elephas_maximus	Elephantidae	Proboscidea	R_2	2004	Producers	MN	Weak	Low	Grazing/herbivory/browsing; Direct physical disturbance	Direct	Asia	Yes	Negative
Elephas_maximus	Elephantidae	Proboscidea	R_2	2004	Producers	MN	Weak	Low	Grazing/herbivory/browsing; Direct physical disturbance	Direct	Asia	Yes	Negative
Elephas_maximus	Elephantidae	Proboscidea	R_2	2004	Producers	MN	Weak	Low	Grazing/herbivory/browsing; Direct physical disturbance	Direct	Asia	Yes	Negative
Elephas_maximus	Elephantidae	Proboscidea	R_2	2004	Producers	MN	Weak	Low	Grazing/herbivory/browsing; Direct physical disturbance	Direct	Asia	Yes	Negative
Equus_caballus	Equidae	Perissodactyla	R_20	2004	Secondary_consumers	MO	Strong	Low	Chemical, physical or structural impact on ecosystems	Indirect	North and Central America	No	Negative
Equus_caballus	Equidae	Perissodactyla	R_20	2004	Secondary_consumers	MO	Strong	Low	Chemical, physical or structural impact on ecosystems	Indirect	North and Central America	No	Negative
Equus_caballus	Equidae	Perissodactyla	R_20	2004	Primary_consumers	MC	Weak	High	Chemical, physical or structural impact on ecosystems	Indirect	North and Central America	No	Negative
Equus_caballus	Equidae	Perissodactyla	R_20	2004	Secondary_consumers	MO	Strong	Low	Chemical, physical or structural impact on ecosystems	Indirect	North and Central America	No	Negative
Equus_caballus	Equidae	Perissodactyla	R_20	2004	Primary_consumers	MO	Strong	Low	Chemical, physical or structural impact on ecosystems	Indirect	North and Central America	No	Negative
Equus_caballus	Equidae	Perissodactyla	R_20	2004	Primary_consumers	MC	Weak	High	Chemical, physical or structural impact on ecosystems	Indirect	North and Central America	No	Negative
Equus_caballus	Equidae	Perissodactyla	R_20	2004	Secondary_consumers	MO	Strong	Low	Chemical, physical or structural impact on ecosystems	Indirect	North and Central America	No	Negative
Equus_caballus	Equidae	Perissodactyla	R_20	2004	Primary_consumers	MO	Strong	Low	Chemical, physical or structural impact on ecosystems	Indirect	North and Central America	No	Negative
Equus_caballus	Equidae	Perissodactyla	R_20	2004	Primary_consumers	MC	Weak	High	Chemical, physical or structural impact on ecosystems	Indirect	North and Central America	No	Negative
Equus_caballus	Equidae	Perissodactyla	R_20	2004	Secondary_consumers	MO	Strong	Low	Chemical, physical or structural impact on ecosystems	Indirect	North and Central America	No	Negative
Equus_caballus	Equidae	Perissodactyla	R_20	2004	Primary_consumers	MO	Strong	Low	Chemical, physical or structural impact on ecosystems	Indirect	North and Central America	No	Negative
Equus_caballus	Equidae	Perissodactyla	R_20	2004	Secondary_consumers	MO	Strong	Low	Chemical, physical or structural impact on ecosystems	Indirect	North and Central America	No	Negative
Equus_caballus	Equidae	Perissodactyla	R_20	2004	Secondary_consumers	MO	Strong	Low	Chemical, physical or structural impact on ecosystems	Indirect	North and Central America	No	Negative
Equus_caballus	Equidae	Perissodactyla	R_20	2004	Primary_consumers	MC	Weak	High	Chemical, physical or structural impact on ecosystems	Indirect	North and Central America	No	Negative
Equus_caballus	Equidae	Perissodactyla	R_20	2004	Secondary_consumers	MO	Strong	Low	Chemical, physical or structural impact on ecosystems	Indirect	North and Central America	No	Negative
Equus_caballus	Equidae	Perissodactyla	R_20	2004	Secondary_consumers	MC	Weak	High	(10) Indirect impacts through interactions with other taxa	Indirect	North_and_Central_America	No	Positive
Equus_caballus	Equidae	Perissodactyla	R_20	2004	Primary_consumers	MC	Weak	High	Chemical, physical or structural impact on ecosystems	Indirect	North_and_Central_America	No	Positive
Equus_caballus	Equidae	Perissodactyla	R_20	2004	Primary_consumers	MO	Strong	High	Chemical, physical or structural impact on ecosystems	Indirect	North_and_Central_America	No	Positive
Equus_caballus	Equidae	Perissodactyla	R_20	2004	Primary_consumers	MC	Weak	High	Chemical, physical or structural impact on ecosystems	Indirect	North_and_Central_America	No	Positive
Equus_caballus	Equidae	Perissodactyla	R_20	2004	Primary_consumers	MC	Weak	High	Chemical, physical or structural impact on ecosystems	Indirect	North_and_Central_America	No	Positive
Equus_caballus	Equidae	Perissodactyla	R_20	2004	Primary_consumers	MO	Strong	Medium	(10) Indirect impacts through interactions with other taxa	Indirect	North_and_Central_America	No	Positive
Equus_caballus	Equidae	Perissodactyla	R_20	2004	Primary_consumers	MO	Strong	Medium	(10) Indirect impacts through interactions with other taxa	Indirect	North_and_Central_America	No	Positive
Equus_caballus	Equidae	Perissodactyla	R_20	2004	Primary_consumers	MO	Strong	Medium	(10) Indirect impacts through interactions with other taxa	Indirect	North_and_Central_America	No	Positive
Equus_caballus	Equidae	Perissodactyla	R_20	2004	Primary_consumers	MO	Strong	Medium	(10) Indirect impacts through interactions with other taxa	Indirect	North_and_Central_America	No	Positive
Equus_caballus	Equidae	Perissodactyla	R_20	2004	Primary_consumers	MO	Strong	Medium	(10) Indirect impacts through interactions with other taxa	Indirect	North_and_Central_America	No	Positive
Equus_caballus	Equidae	Perissodactyla	R_20	2004	Primary_consumers	MO	Strong	Medium	(10) Indirect impacts through interactions with other taxa	Indirect	North_and_Central_America	No	Positive
Odocoileus_virginianus	Cervidae	Cetartiodactyla	R_200	2004	Producers	MN	Weak	Medium	Grazing/herbivory/browsing	Direct	North and Central America	Yes	Negative
Dama_dama	Cervidae	Cetartiodactyla	R_201	2001	Producers	MO	Strong	Medium	Grazing/herbivory/browsing	Direct	Europe	Yes	Negative
Dama_dama	Cervidae	Cetartiodactyla	R_201	2001	Producers	MO	Strong	Medium	Grazing/herbivory/browsing	Direct	Europe	Yes	Negative
Muntiacus_reevesi	Cervidae	Cetartiodactyla	R_201	2001	Producers	MO	Strong	Medium	Grazing/herbivory/browsing	Direct	Europe	Yes	Negative
Muntiacus_reevesi	Cervidae	Cetartiodactyla	R_201	2001	Producers	MO	Strong	Medium	Grazing/herbivory/browsing	Direct	Europe	Yes	Negative
Capra_hircus	Bovidae	Cetartiodactyla	R_202	1972	Producers	MC	Weak	Medium	Grazing/herbivory/browsing	Direct	North and Central America	Yes	Negative
Capra_hircus	Bovidae	Cetartiodactyla	R_202	1972	Producers	MC	Weak	Medium	Grazing/herbivory/browsing	Direct	North and Central America	Yes	Negative
Odocoileus_virginianus	Cervidae	Cetartiodactyla	R_203	2008	Producers	MO	Strong	Low	Grazing/herbivory/browsing	Direct	Europe	Yes	Negative
Odocoileus_virginianus	Cervidae	Cetartiodactyla	R_203	2008	Producers	MO	Strong	Low	Grazing/herbivory/browsing	Direct	Europe	Yes	Negative
Odocoileus_virginianus	Cervidae	Cetartiodactyla	R_203	2008	Producers	MO	Strong	Low	Grazing/herbivory/browsing	Direct	Europe	Yes	Negative
Rusa_unicolor	Cervidae	Cetartiodactyla	R_204	2007	Primary_consumers	MC	Weak	Low	Competition	Indirect	North and Central America	Yes	Negative
Capra_hircus	Bovidae	Cetartiodactyla	R_205	2019	Producers	MN	Weak	Low	(5) Dispersal facilitation	Direct	Europe	Yes	Positive
Capra_hircus	Bovidae	Cetartiodactyla	R_205	2022	Producers	MN	Weak	High	(2) Overcompensation	Direct	Europe	Yes	Positive
Bos_taurus	Bovidae	Cetartiodactyla	R_206	2009	Producers	MN	Weak	Medium	Grazing/herbivory/browsing	Direct	Oceania	No	Negative
Bos_taurus	Bovidae	Cetartiodactyla	R_206	2009	Producers	MN	Weak	Medium	Grazing/herbivory/browsing	Direct	Oceania	No	Negative
Bos_taurus	Bovidae	Cetartiodactyla	R_206	2009	Producers	MC	Weak	Medium	Grazing/herbivory/browsing	Direct	Oceania	No	Negative
Bos_taurus	Bovidae	Cetartiodactyla	R_206	2009	Producers	MC	Weak	Medium	Grazing/herbivory/browsing	Direct	Oceania	No	Negative
Bos_taurus	Bovidae	Cetartiodactyla	R_206	2009	Producers	MC	Weak	Medium	Grazing/herbivory/browsing	Direct	Oceania	No	Negative
Rusa_unicolor	Cervidae	Cetartiodactyla	R_207	2006	Producers	MN	Weak	Low	Direct physical disturbance	Direct	Oceania	No	Negative
Sus_scrofa	Suidae	Cetartiodactyla	R_208	2014	Producers	MN	Weak	Low	Direct physical disturbance	Direct	North and Central America	Yes	Negative
Sus_scrofa	Suidae	Cetartiodactyla	R_208	2014	Producers	MN	Weak	Low	Direct physical disturbance	Direct	North and Central America	Yes	Negative
Sus_scrofa	Suidae	Cetartiodactyla	R_208	2014	Producers	MN	Weak	Low	Direct physical disturbance	Direct	North and Central America	Yes	Negative
Equus_caballus	Equidae	Perissodactyla	R_21	2006	Secondary_consumers	MO	Strong	Low	Chemical, physical or structural impact on ecosystems	Indirect	North and Central America	No	Negative
Sus_scrofa	Suidae	Cetartiodactyla	R_210	1991	Decomposers	MO	Strong	Medium	(10) Indirect impacts through interactions with other taxa	Indirect	Oceania	Yes	Positive
Capra_hircus	Bovidae	Cetartiodactyla	R_213	2016	Producers	MC	Weak	Low	(10) Indirect impacts through interactions with other taxa	Indirect	Asia	Yes	Positive
Equus_caballus	Equidae	Perissodactyla	R_214	2009	Producers	MN	Weak	Low	Direct physical disturbance	Direct	North and Central America	No	Negative
Equus_caballus	Equidae	Perissodactyla	R_214	2009	Producers	MO	Strong	Low	(7) Chemical impact on ecosystem	Indirect	North_and_Central_America	No	Positive
Hemitragus_jemlahicus	Bovidae	Cetartiodactyla	R_215	1999	Producers	MO	Strong	Low	Grazing/herbivory/browsing	Direct	Oceania	Yes	Negative
Sus_scrofa	Suidae	Cetartiodactyla	R_216	2015	Secondary_consumers	MN	Weak	Medium	Predation	Direct	Oceania	Yes	Negative
Sus_scrofa	Suidae	Cetartiodactyla	R_216	2015	Decomposers	MN	Weak	Medium	Predation	Direct	Oceania	Yes	Negative
Sus_scrofa	Suidae	Cetartiodactyla	R_216	2015	Primary_consumers	MN	Weak	Medium	Predation	Direct	Oceania	Yes	Negative
Sus_scrofa	Suidae	Cetartiodactyla	R_216	2015	Secondary_consumers	MN	Weak	Medium	Predation	Direct	Oceania	Yes	Negative
Sus_scrofa	Suidae	Cetartiodactyla	R_216	2015	Producers	MC	Weak	Medium	Direct physical disturbance	Direct	Oceania	Yes	Negative
Sus_scrofa	Suidae	Cetartiodactyla	R_216	2015	Producers	MC	Weak	Medium	Direct physical disturbance	Direct	Oceania	Yes	Negative
Sus_scrofa	Suidae	Cetartiodactyla	R_216	2015	Producers	MC	Weak	Medium	Direct physical disturbance	Direct	Oceania	Yes	Negative
Sus_scrofa	Suidae	Cetartiodactyla	R_216	2015	Producers	MC	Weak	Medium	Direct physical disturbance	Direct	Oceania	Yes	Negative
Sus_scrofa	Suidae	Cetartiodactyla	R_216	2015	Producers	MC	Weak	Medium	Direct physical disturbance	Direct	Oceania	Yes	Negative
Sus_scrofa	Suidae	Cetartiodactyla	R_216	2015	Producers	MC	Weak	Medium	Direct physical disturbance	Direct	Oceania	Yes	Negative
Sus_scrofa	Suidae	Cetartiodactyla	R_216	2015	Producers	MC	Weak	Medium	Direct physical disturbance	Direct	Oceania	Yes	Negative
Sus_scrofa	Suidae	Cetartiodactyla	R_216	2015	Producers	MC	Weak	Medium	Direct physical disturbance	Direct	Oceania	Yes	Negative
Sus_scrofa	Suidae	Cetartiodactyla	R_216	2015	Producers	MC	Weak	Medium	Direct physical disturbance	Direct	Oceania	Yes	Negative
Sus_scrofa	Suidae	Cetartiodactyla	R_216	2015	Producers	MC	Weak	Medium	Direct physical disturbance	Direct	Oceania	Yes	Negative
Sus_scrofa	Suidae	Cetartiodactyla	R_216	2015	Producers	MC	Weak	Medium	Direct physical disturbance	Direct	Oceania	Yes	Negative
Sus_scrofa	Suidae	Cetartiodactyla	R_216	2015	Producers	MC	Weak	Medium	Direct physical disturbance	Direct	Oceania	Yes	Negative
Sus_scrofa	Suidae	Cetartiodactyla	R_216	2015	Producers	MN	Weak	Medium	(5) Dispersal facilitation	Direct	Oceania	Yes	Positive
Sus_scrofa	Suidae	Cetartiodactyla	R_216	2015	Producers	MN	Weak	Medium	(5) Dispersal facilitation	Direct	Oceania	Yes	Positive
Sus_scrofa	Suidae	Cetartiodactyla	R_216	2015	Producers	MN	Weak	Medium	(5) Dispersal facilitation	Direct	Oceania	Yes	Positive
Sus_scrofa	Suidae	Cetartiodactyla	R_216	2015	Producers	MN	Weak	Medium	(5) Dispersal facilitation	Direct	Oceania	Yes	Positive
Sus_scrofa	Suidae	Cetartiodactyla	R_216	2015	Producers	MN	Weak	Low	(5) Dispersal facilitation	Direct	Oceania	Yes	Positive
Sus_scrofa	Suidae	Cetartiodactyla	R_216	2015	Producers	MN	Weak	Low	(5) Dispersal facilitation	Direct	Oceania	Yes	Positive
Sus_scrofa	Suidae	Cetartiodactyla	R_216	2015	Producers	MN	Weak	Low	(5) Dispersal facilitation	Direct	Oceania	Yes	Positive
Sus_scrofa	Suidae	Cetartiodactyla	R_216	2015	Producers	MN	Weak	Low	(5) Dispersal facilitation	Direct	Oceania	Yes	Positive
Sus_scrofa	Suidae	Cetartiodactyla	R_216	2015	Producers	MC	Weak	Low	(5) Dispersal facilitation	Direct	Oceania	Yes	Positive
Capra_hircus	Bovidae	Cetartiodactyla	R_217	1984	Producers	MO	Strong	Low	Grazing/herbivory/browsing	Direct	Oceania	Yes	Negative
Capra_hircus	Bovidae	Cetartiodactyla	R_217	1984	Producers	MO	Strong	Low	Grazing/herbivory/browsing	Direct	Oceania	Yes	Negative
Capra_hircus	Bovidae	Cetartiodactyla	R_217	1984	Producers	MO	Strong	Low	Grazing/herbivory/browsing	Direct	Oceania	Yes	Negative
Capra_hircus	Bovidae	Cetartiodactyla	R_217	1984	Producers	MO	Strong	Low	Grazing/herbivory/browsing	Direct	Oceania	Yes	Negative
Capra_hircus	Bovidae	Cetartiodactyla	R_217	1984	Producers	MO	Strong	Low	Grazing/herbivory/browsing	Direct	Oceania	Yes	Negative
Capra_hircus	Bovidae	Cetartiodactyla	R_217	1984	Producers	MO	Strong	Low	Grazing/herbivory/browsing	Direct	Oceania	Yes	Negative
Capra_hircus	Bovidae	Cetartiodactyla	R_217	1984	Producers	MN	Weak	Low	Grazing/herbivory/browsing	Direct	Oceania	Yes	Negative
Capra_hircus	Bovidae	Cetartiodactyla	R_217	1984	Producers	MN	Weak	Low	Grazing/herbivory/browsing	Direct	Oceania	Yes	Negative
Bos_taurus	Bovidae	Cetartiodactyla	R_218	2011	Producers	MN	Weak	Medium	Grazing/herbivory/browsing	Direct	South America	No	Negative
Equus_asinus	Equidae	Perissodactyla	R_218	2011	Producers	MN	Weak	Medium	Grazing/herbivory/browsing	Direct	South America	No	Negative
Rusa_unicolor	Cervidae	Cetartiodactyla	R_219	2005	Producers	MO	Strong	Low	Grazing/herbivory/browsing; Direct physical disturbance	Direct	Oceania	No	Negative
Rusa_unicolor	Cervidae	Cetartiodactyla	R_219	2005	Producers	MO	Strong	Low	Grazing/herbivory/browsing; Direct physical disturbance	Direct	Oceania	No	Negative
Rusa_unicolor	Cervidae	Cetartiodactyla	R_219	2005	Producers	MO	Strong	Low	Grazing/herbivory/browsing; Direct physical disturbance	Direct	Oceania	No	Negative
Rusa_unicolor	Cervidae	Cetartiodactyla	R_219	2005	Producers	MO	Strong	Low	Grazing/herbivory/browsing; Direct physical disturbance	Direct	Oceania	No	Negative
Rusa_unicolor	Cervidae	Cetartiodactyla	R_219	2005	Producers	MO	Strong	Low	Grazing/herbivory/browsing; Direct physical disturbance	Direct	Oceania	No	Negative
Rusa_unicolor	Cervidae	Cetartiodactyla	R_219	2005	Producers	MO	Strong	Low	Grazing/herbivory/browsing; Direct physical disturbance	Direct	Oceania	No	Negative
Equus_caballus	Equidae	Perissodactyla	R_22	2008	Producers	MO	Strong	Low	Grazing/herbivory/browsing	Direct	North and Central America	No	Negative
Equus_caballus	Equidae	Perissodactyla	R_22	2008	Producers	MN	Weak	Medium	Grazing/herbivory/browsing	Direct	North and Central America	No	Negative
Cervus_nippon	Cervidae	Cetartiodactyla	R_220	2009	Primary_consumers	MC	Weak	High	Hybridisation	Direct	Europe	Yes	Negative
Cervus_nippon	Cervidae	Cetartiodactyla	R_220	2009	Primary_consumers	MC	Weak	High	(3) Hybridisation	Direct	Europe	Yes	Positive
Sus_scrofa	Suidae	Cetartiodactyla	R_221	2019	Producers	MC	Weak	Low	(5) Dispersal facilitation	Direct	South_America	No	Positive
Cervus_nippon	Cervidae	Cetartiodactyla	R_222	2011	Producers	MO	Strong	Medium	Grazing/herbivory/browsing	Direct	Europe	Yes	Negative
Cervus_nippon	Cervidae	Cetartiodactyla	R_222	2011	Producers	MO	Strong	Medium	Grazing/herbivory/browsing	Direct	Europe	Yes	Negative
Cervus_nippon	Cervidae	Cetartiodactyla	R_222	2011	Producers	MO	Strong	High	Grazing/herbivory/browsing	Direct	Europe	Yes	Negative
Cervus_nippon	Cervidae	Cetartiodactyla	R_222	2011	Producers	MO	Strong	High	Grazing/herbivory/browsing	Direct	Europe	Yes	Negative
Cervus_nippon	Cervidae	Cetartiodactyla	R_222	2011	Producers	MO	Strong	High	Grazing/herbivory/browsing	Direct	Europe	Yes	Negative
Cervus_nippon	Cervidae	Cetartiodactyla	R_222	2011	Producers	MR	Strong	Low	(10) Indirect impacts through interactions with other taxa	Indirect	Europe	Yes	Positive
Cervus_nippon	Cervidae	Cetartiodactyla	R_222	2011	Producers	MO	Strong	High	(10) Indirect impacts through interactions with other taxa	Indirect	Europe	Yes	Positive
Cervus_nippon	Cervidae	Cetartiodactyla	R_222	2011	Producers	MO	Strong	Low	(10) Indirect impacts through interactions with other taxa	Indirect	Europe	Yes	Positive
Cervus_nippon	Cervidae	Cetartiodactyla	R_222	2011	Producers	MO	Strong	Low	(10) Indirect impacts through interactions with other taxa	Indirect	Europe	Yes	Positive
Cervus_nippon	Cervidae	Cetartiodactyla	R_222	2011	Producers	MO	Strong	Low	(10) Indirect impacts through interactions with other taxa	Indirect	Europe	Yes	Positive
Cervus_nippon	Cervidae	Cetartiodactyla	R_222	2011	Producers	MO	Strong	High	(10) Indirect impacts through interactions with other taxa	Indirect	Europe	Yes	Positive
Cervus_nippon	Cervidae	Cetartiodactyla	R_222	2011	Producers	MR	Strong	Low	(10) Indirect impacts through interactions with other taxa	Indirect	Europe	Yes	Positive
Cervus_nippon	Cervidae	Cetartiodactyla	R_222	2011	Producers	MO	Strong	High	(10) Indirect impacts through interactions with other taxa	Indirect	Europe	Yes	Positive
Cervus_nippon	Cervidae	Cetartiodactyla	R_222	2011	Producers	MO	Strong	Medium	(10) Indirect impacts through interactions with other taxa	Indirect	Europe	Yes	Positive
Cervus_nippon	Cervidae	Cetartiodactyla	R_222	2011	Producers	MO	Strong	Medium	(10) Indirect impacts through interactions with other taxa	Indirect	Europe	Yes	Positive
Cervus_nippon	Cervidae	Cetartiodactyla	R_222	2011	Producers	MR	Strong	Low	(10) Indirect impacts through interactions with other taxa	Indirect	Europe	Yes	Positive
Cervus_nippon	Cervidae	Cetartiodactyla	R_222	2011	Producers	MO	Strong	Medium	(10) Indirect impacts through interactions with other taxa	Indirect	Europe	Yes	Positive
Cervus_nippon	Cervidae	Cetartiodactyla	R_222	2011	Producers	MO	Strong	Medium	(10) Indirect impacts through interactions with other taxa	Indirect	Europe	Yes	Positive
Cervus_nippon	Cervidae	Cetartiodactyla	R_222	2011	Producers	MO	Strong	Low	(10) Indirect impacts through interactions with other taxa	Indirect	Europe	Yes	Positive
Dama_dama	Cervidae	Cetartiodactyla	R_223	2001	Secondary_consumers	MO	Strong	Medium	Chemical, physical or structural impact on ecosystems	Indirect	Europe	Yes	Negative
Dama_dama	Cervidae	Cetartiodactyla	R_223	2001	Secondary_consumers	MO	Strong	Medium	Chemical, physical or structural impact on ecosystems	Indirect	Europe	Yes	Negative
Dama_dama	Cervidae	Cetartiodactyla	R_223	2001	Secondary_consumers	MO	Strong	Medium	Chemical, physical or structural impact on ecosystems	Indirect	Europe	Yes	Negative
Dama_dama	Cervidae	Cetartiodactyla	R_223	2001	Primary_consumers	MO	Strong	Medium	Chemical, physical or structural impact on ecosystems	Indirect	Europe	Yes	Negative
Dama_dama	Cervidae	Cetartiodactyla	R_223	2001	Secondary_consumers	MO	Strong	Medium	Chemical, physical or structural impact on ecosystems	Indirect	Europe	Yes	Negative
Dama_dama	Cervidae	Cetartiodactyla	R_223	2001	Secondary_consumers	MO	Strong	Medium	Chemical, physical or structural impact on ecosystems	Indirect	Europe	Yes	Negative
Dama_dama	Cervidae	Cetartiodactyla	R_223	2001	Secondary_consumers	MO	Strong	Medium	Chemical, physical or structural impact on ecosystems	Indirect	Europe	Yes	Negative
Dama_dama	Cervidae	Cetartiodactyla	R_223	2001	Secondary_consumers	MO	Strong	Medium	Chemical, physical or structural impact on ecosystems	Indirect	Europe	Yes	Negative
Muntiacus_reevesi	Cervidae	Cetartiodactyla	R_223	2001	Secondary_consumers	MO	Strong	Medium	Chemical, physical or structural impact on ecosystems	Indirect	Europe	Yes	Negative
Muntiacus_reevesi	Cervidae	Cetartiodactyla	R_223	2001	Secondary_consumers	MO	Strong	Medium	Chemical, physical or structural impact on ecosystems	Indirect	Europe	Yes	Negative
Muntiacus_reevesi	Cervidae	Cetartiodactyla	R_223	2001	Secondary_consumers	MO	Strong	Medium	Chemical, physical or structural impact on ecosystems	Indirect	Europe	Yes	Negative
Muntiacus_reevesi	Cervidae	Cetartiodactyla	R_223	2001	Primary_consumers	MO	Strong	Medium	Chemical, physical or structural impact on ecosystems	Indirect	Europe	Yes	Negative
Muntiacus_reevesi	Cervidae	Cetartiodactyla	R_223	2001	Secondary_consumers	MO	Strong	Medium	Chemical, physical or structural impact on ecosystems	Indirect	Europe	Yes	Negative
Muntiacus_reevesi	Cervidae	Cetartiodactyla	R_223	2001	Secondary_consumers	MO	Strong	Medium	Chemical, physical or structural impact on ecosystems	Indirect	Europe	Yes	Negative
Muntiacus_reevesi	Cervidae	Cetartiodactyla	R_223	2001	Secondary_consumers	MO	Strong	Medium	Chemical, physical or structural impact on ecosystems	Indirect	Europe	Yes	Negative
Muntiacus_reevesi	Cervidae	Cetartiodactyla	R_223	2001	Secondary_consumers	MO	Strong	Medium	Chemical, physical or structural impact on ecosystems	Indirect	Europe	Yes	Negative
Bubalus_bubalis	Bovidae	Cetartiodactyla	R_224	2007	Producers	MO	Strong	Low	Grazing/herbivory/browsing	Direct	Oceania	No	Negative
Bubalus_bubalis	Bovidae	Cetartiodactyla	R_224	2007	Producers	MO	Strong	Low	Grazing/herbivory/browsing	Direct	Oceania	No	Negative
Bubalus_bubalis	Bovidae	Cetartiodactyla	R_224	2007	Producers	MO	Strong	Low	Grazing/herbivory/browsing	Direct	Oceania	No	Negative
Bubalus_bubalis	Bovidae	Cetartiodactyla	R_224	2007	Producers	MO	Strong	Low	Grazing/herbivory/browsing	Direct	Oceania	No	Negative
Bubalus_bubalis	Bovidae	Cetartiodactyla	R_224	2007	Producers	MO	Strong	Low	Grazing/herbivory/browsing	Direct	Oceania	No	Negative
Bubalus_bubalis	Bovidae	Cetartiodactyla	R_224	2007	Producers	MO	Strong	Low	Grazing/herbivory/browsing	Direct	Oceania	No	Negative
Bubalus_bubalis	Bovidae	Cetartiodactyla	R_224	2007	Producers	MN	Weak	Low	(10) Indirect impacts through interactions with other taxa	Indirect	Oceania	No	Positive
Oreamnos_americanus	Bovidae	Cetartiodactyla	R_225	1985	Producers	MO	Strong	Medium	Grazing/herbivory/browsing	Direct	North and Central America	Yes	Negative
Odocoileus_hemionus	Cervidae	Cetartiodactyla	R_226	1980	Producers	MO	Strong	Medium	Grazing/herbivory/browsing	Direct	North and Central America	Yes	Negative
Odocoileus_hemionus	Cervidae	Cetartiodactyla	R_226	1980	Producers	MO	Strong	Medium	Grazing/herbivory/browsing	Direct	North and Central America	Yes	Negative
Odocoileus_hemionus	Cervidae	Cetartiodactyla	R_226	1980	Producers	MO	Strong	Medium	Grazing/herbivory/browsing	Direct	North and Central America	Yes	Negative
Odocoileus_hemionus	Cervidae	Cetartiodactyla	R_226	1980	Producers	MO	Strong	Medium	Grazing/herbivory/browsing	Direct	North and Central America	Yes	Negative
Odocoileus_hemionus	Cervidae	Cetartiodactyla	R_226	1980	Producers	MO	Strong	Medium	Grazing/herbivory/browsing	Direct	North and Central America	Yes	Negative
Odocoileus_hemionus	Cervidae	Cetartiodactyla	R_226	1980	Producers	MO	Strong	Medium	Grazing/herbivory/browsing	Direct	North and Central America	Yes	Negative
Odocoileus_hemionus	Cervidae	Cetartiodactyla	R_226	1980	Producers	MO	Strong	Medium	Grazing/herbivory/browsing	Direct	North and Central America	Yes	Negative
Odocoileus_hemionus	Cervidae	Cetartiodactyla	R_226	1980	Producers	MO	Strong	Medium	Grazing/herbivory/browsing	Direct	North and Central America	Yes	Negative
Odocoileus_hemionus	Cervidae	Cetartiodactyla	R_226	1980	Producers	MO	Strong	Medium	Grazing/herbivory/browsing	Direct	North and Central America	Yes	Negative
Odocoileus_hemionus	Cervidae	Cetartiodactyla	R_226	1980	Producers	MO	Strong	Medium	Grazing/herbivory/browsing	Direct	North and Central America	Yes	Negative
Odocoileus_hemionus	Cervidae	Cetartiodactyla	R_226	1980	Producers	MN	Weak	Medium	Grazing/herbivory/browsing	Direct	North and Central America	Yes	Negative
Odocoileus_hemionus	Cervidae	Cetartiodactyla	R_226	1980	Producers	MN	Weak	Medium	Grazing/herbivory/browsing	Direct	North and Central America	Yes	Negative
Odocoileus_hemionus	Cervidae	Cetartiodactyla	R_226	1980	Producers	MN	Weak	Medium	Grazing/herbivory/browsing	Direct	North and Central America	Yes	Negative
Muntiacus_reevesi	Cervidae	Cetartiodactyla	R_227	1994	Primary_consumers	MN	Weak	Low	Chemical, physical or structural impact on ecosystems	Indirect	Europe	Yes	Negative
Equus_caballus	Equidae	Perissodactyla	R_228	2014	Producers	MN	Weak	Low	Grazing/herbivory/browsing	Direct	North and Central America	No	Negative
Equus_caballus	Equidae	Perissodactyla	R_228	2014	Producers	MN	Weak	Low	Grazing/herbivory/browsing	Direct	North and Central America	No	Negative
Odocoileus_virginianus	Cervidae	Cetartiodactyla	R_229	2004	Producers	MO	Strong	Medium	Grazing/herbivory/browsing	Direct	North and Central America	Yes	Negative
Odocoileus_virginianus	Cervidae	Cetartiodactyla	R_229	2004	Producers	MO	Strong	Medium	Grazing/herbivory/browsing	Direct	North and Central America	Yes	Negative
Odocoileus_virginianus	Cervidae	Cetartiodactyla	R_229	2004	Producers	MO	Strong	Medium	Grazing/herbivory/browsing	Direct	North and Central America	Yes	Negative
Odocoileus_virginianus	Cervidae	Cetartiodactyla	R_229	2004	Producers	MO	Strong	Medium	Grazing/herbivory/browsing	Direct	North and Central America	Yes	Negative
Odocoileus_virginianus	Cervidae	Cetartiodactyla	R_229	2004	Producers	MO	Strong	Low	Grazing/herbivory/browsing	Direct	North and Central America	Yes	Negative
Odocoileus_virginianus	Cervidae	Cetartiodactyla	R_229	2004	Producers	MN	Weak	Medium	Grazing/herbivory/browsing	Direct	North and Central America	Yes	Negative
Odocoileus_virginianus	Cervidae	Cetartiodactyla	R_229	2004	Producers	MN	Weak	Medium	Grazing/herbivory/browsing	Direct	North and Central America	Yes	Negative
Odocoileus_virginianus	Cervidae	Cetartiodactyla	R_229	2004	Producers	MN	Weak	Medium	Grazing/herbivory/browsing	Direct	North and Central America	Yes	Negative
Odocoileus_virginianus	Cervidae	Cetartiodactyla	R_23	2008	Producers	MN	Weak	Medium	Grazing/herbivory/browsing	Direct	Europe	Yes	Negative
Odocoileus_virginianus	Cervidae	Cetartiodactyla	R_23	2008	Producers	MN	Weak	Medium	Grazing/herbivory/browsing	Direct	Europe	Yes	Negative
Odocoileus_virginianus	Cervidae	Cetartiodactyla	R_23	2008	Producers	MN	Weak	Medium	Grazing/herbivory/browsing	Direct	Europe	Yes	Negative
Odocoileus_virginianus	Cervidae	Cetartiodactyla	R_23	2008	Producers	MN	Weak	Medium	Grazing/herbivory/browsing	Direct	Europe	Yes	Negative
Odocoileus_virginianus	Cervidae	Cetartiodactyla	R_230	1992	Producers	MO	Strong	High	Grazing/herbivory/browsing	Direct	North and Central America	Yes	Negative
Odocoileus_virginianus	Cervidae	Cetartiodactyla	R_230	1992	Producers	MO	Strong	High	Grazing/herbivory/browsing	Direct	North and Central America	Yes	Negative
Odocoileus_virginianus	Cervidae	Cetartiodactyla	R_230	1992	Producers	MO	Strong	High	Grazing/herbivory/browsing	Direct	North and Central America	Yes	Negative
Odocoileus_virginianus	Cervidae	Cetartiodactyla	R_230	1992	Producers	MO	Strong	High	Grazing/herbivory/browsing	Direct	North and Central America	Yes	Negative
Odocoileus_virginianus	Cervidae	Cetartiodactyla	R_230	1992	Producers	MN	Weak	Medium	Grazing/herbivory/browsing	Direct	North and Central America	Yes	Negative
Odocoileus_virginianus	Cervidae	Cetartiodactyla	R_230	1992	Producers	MN	Weak	Medium	Grazing/herbivory/browsing	Direct	North and Central America	Yes	Negative
Odocoileus_virginianus	Cervidae	Cetartiodactyla	R_230	1992	Producers	MN	Weak	Medium	Grazing/herbivory/browsing	Direct	North and Central America	Yes	Negative
Odocoileus_virginianus	Cervidae	Cetartiodactyla	R_230	1992	Producers	MO	Strong	Medium	(10) Indirect impacts through interactions with other taxa	Indirect	North_and_Central_America	Yes	Positive
Odocoileus_virginianus	Cervidae	Cetartiodactyla	R_230	1992	Producers	MO	Strong	Medium	(10) Indirect impacts through interactions with other taxa	Indirect	North_and_Central_America	Yes	Positive
Odocoileus_virginianus	Cervidae	Cetartiodactyla	R_231	2002	Producers	MN	Weak	Medium	Grazing/herbivory/browsing	Direct	North and Central America	Yes	Negative
Odocoileus_virginianus	Cervidae	Cetartiodactyla	R_232	2000	Producers	MO	Strong	High	Grazing/herbivory/browsing	Direct	North and Central America	Yes	Negative
Odocoileus_virginianus	Cervidae	Cetartiodactyla	R_232	2000	Producers	MO	Strong	High	Grazing/herbivory/browsing	Direct	North and Central America	Yes	Negative
Odocoileus_virginianus	Cervidae	Cetartiodactyla	R_232	2000	Producers	MO	Strong	High	Grazing/herbivory/browsing	Direct	North and Central America	Yes	Negative
Odocoileus_virginianus	Cervidae	Cetartiodactyla	R_232	2000	Producers	MO	Strong	High	Grazing/herbivory/browsing	Direct	North and Central America	Yes	Negative
Odocoileus_virginianus	Cervidae	Cetartiodactyla	R_232	2000	Producers	MO	Strong	High	Grazing/herbivory/browsing	Direct	North and Central America	Yes	Negative
Odocoileus_virginianus	Cervidae	Cetartiodactyla	R_232	2000	Producers	MO	Strong	High	Grazing/herbivory/browsing	Direct	North and Central America	Yes	Negative
Odocoileus_virginianus	Cervidae	Cetartiodactyla	R_232	2000	Producers	MO	Strong	High	Grazing/herbivory/browsing	Direct	North and Central America	Yes	Negative
Odocoileus_virginianus	Cervidae	Cetartiodactyla	R_232	2000	Producers	MO	Strong	High	Grazing/herbivory/browsing	Direct	North and Central America	Yes	Negative
Odocoileus_virginianus	Cervidae	Cetartiodactyla	R_232	2000	Producers	MO	Strong	High	Grazing/herbivory/browsing	Direct	North and Central America	Yes	Negative
Odocoileus_virginianus	Cervidae	Cetartiodactyla	R_232	2000	Producers	MO	Strong	High	Grazing/herbivory/browsing	Direct	North and Central America	Yes	Negative
Odocoileus_virginianus	Cervidae	Cetartiodactyla	R_232	2000	Producers	MO	Strong	High	Grazing/herbivory/browsing	Direct	North and Central America	Yes	Negative
Odocoileus_virginianus	Cervidae	Cetartiodactyla	R_232	2000	Producers	MO	Strong	High	Grazing/herbivory/browsing	Direct	North and Central America	Yes	Negative
Odocoileus_virginianus	Cervidae	Cetartiodactyla	R_232	2000	Producers	MO	Strong	High	Grazing/herbivory/browsing	Direct	North and Central America	Yes	Negative
Odocoileus_virginianus	Cervidae	Cetartiodactyla	R_232	2000	Producers	MO	Strong	High	Grazing/herbivory/browsing	Direct	North and Central America	Yes	Negative
Odocoileus_virginianus	Cervidae	Cetartiodactyla	R_232	2000	Producers	MO	Strong	High	Grazing/herbivory/browsing	Direct	North and Central America	Yes	Negative
Odocoileus_virginianus	Cervidae	Cetartiodactyla	R_232	2000	Producers	MO	Strong	High	Grazing/herbivory/browsing	Direct	North and Central America	Yes	Negative
Odocoileus_virginianus	Cervidae	Cetartiodactyla	R_232	2000	Producers	MN	Weak	Medium	Grazing/herbivory/browsing	Direct	North and Central America	Yes	Negative
Odocoileus_virginianus	Cervidae	Cetartiodactyla	R_232	2000	Producers	MN	Weak	Medium	Grazing/herbivory/browsing	Direct	North and Central America	Yes	Negative
Odocoileus_virginianus	Cervidae	Cetartiodactyla	R_232	2000	Producers	MN	Weak	Medium	(10) Indirect impacts through interactions with other taxa	Indirect	North_and_Central_America	Yes	Positive
Odocoileus_virginianus	Cervidae	Cetartiodactyla	R_232	2000	Producers	MN	Weak	Medium	(10) Indirect impacts through interactions with other taxa	Indirect	North_and_Central_America	Yes	Positive
Odocoileus_virginianus	Cervidae	Cetartiodactyla	R_232	2000	Producers	MN	Weak	Medium	(10) Indirect impacts through interactions with other taxa	Indirect	North_and_Central_America	Yes	Positive
Odocoileus_virginianus	Cervidae	Cetartiodactyla	R_232	2000	Producers	MN	Weak	Low	(10) Indirect impacts through interactions with other taxa	Indirect	North_and_Central_America	Yes	Positive
Odocoileus_virginianus	Cervidae	Cetartiodactyla	R_232	2000	Producers	MC	Weak	Medium	(10) Indirect impacts through interactions with other taxa	Indirect	North_and_Central_America	Yes	Positive
Odocoileus_virginianus	Cervidae	Cetartiodactyla	R_232	2000	Producers	MC	Weak	Medium	(10) Indirect impacts through interactions with other taxa	Indirect	North_and_Central_America	Yes	Positive
Odocoileus_virginianus	Cervidae	Cetartiodactyla	R_232	2000	Producers	MC	Weak	Medium	(10) Indirect impacts through interactions with other taxa	Indirect	North_and_Central_America	Yes	Positive
Odocoileus_virginianus	Cervidae	Cetartiodactyla	R_232	2000	Producers	MC	Weak	Medium	(10) Indirect impacts through interactions with other taxa	Indirect	North_and_Central_America	Yes	Positive
Odocoileus_virginianus	Cervidae	Cetartiodactyla	R_232	2000	Producers	MC	Weak	Medium	(10) Indirect impacts through interactions with other taxa	Indirect	North_and_Central_America	Yes	Positive
Odocoileus_virginianus	Cervidae	Cetartiodactyla	R_233	2003	Producers	MO	Strong	High	Grazing/herbivory/browsing	Direct	North and Central America	Yes	Negative
Ovis_orientalis	Bovidae	Cetartiodactyla	R_234	1992	Producers	MO	Strong	Low	Grazing/herbivory/browsing	Direct	North and Central America	Yes	Negative
Equus_caballus	Equidae	Perissodactyla	R_235	2007	Producers	MO	Strong	Low	Grazing/herbivory/browsing	Direct	Oceania	No	Negative
Cervus_nippon	Cervidae	Cetartiodactyla	R_236	1986	Producers	MO	Strong	Low	Grazing/herbivory/browsing	Direct	Europe	Yes	Negative
Cervus_nippon	Cervidae	Cetartiodactyla	R_236	1986	Producers	MO	Strong	Low	Grazing/herbivory/browsing	Direct	Europe	Yes	Negative
Cervus_nippon	Cervidae	Cetartiodactyla	R_236	1986	Producers	MO	Strong	Low	Grazing/herbivory/browsing	Direct	Europe	Yes	Negative
Cervus_nippon	Cervidae	Cetartiodactyla	R_236	1986	Producers	MO	Strong	Low	Grazing/herbivory/browsing	Direct	Europe	Yes	Negative
Cervus_nippon	Cervidae	Cetartiodactyla	R_236	1986	Producers	MO	Strong	Low	Grazing/herbivory/browsing	Direct	Europe	Yes	Negative
Cervus_nippon	Cervidae	Cetartiodactyla	R_236	1986	Producers	MO	Strong	Low	Grazing/herbivory/browsing	Direct	Europe	Yes	Negative
Cervus_nippon	Cervidae	Cetartiodactyla	R_236	1986	Producers	MO	Strong	Low	Grazing/herbivory/browsing	Direct	Europe	Yes	Negative
Cervus_nippon	Cervidae	Cetartiodactyla	R_236	1986	Producers	MO	Strong	Low	Grazing/herbivory/browsing	Direct	Europe	Yes	Negative
Cervus_nippon	Cervidae	Cetartiodactyla	R_236	1986	Producers	MO	Strong	Low	Grazing/herbivory/browsing	Direct	Europe	Yes	Negative
Cervus_nippon	Cervidae	Cetartiodactyla	R_236	1986	Producers	MO	Strong	Low	Grazing/herbivory/browsing	Direct	Europe	Yes	Negative
Cervus_nippon	Cervidae	Cetartiodactyla	R_236	1986	Producers	MO	Strong	Low	Grazing/herbivory/browsing	Direct	Europe	Yes	Negative
Cervus_nippon	Cervidae	Cetartiodactyla	R_236	1986	Producers	MO	Strong	Low	Grazing/herbivory/browsing	Direct	Europe	Yes	Negative
Cervus_nippon	Cervidae	Cetartiodactyla	R_236	1986	Producers	MO	Strong	Low	Grazing/herbivory/browsing	Direct	Europe	Yes	Negative
Cervus_nippon	Cervidae	Cetartiodactyla	R_236	1986	Producers	MO	Strong	Low	Grazing/herbivory/browsing	Direct	Europe	Yes	Negative
Cervus_nippon	Cervidae	Cetartiodactyla	R_236	1986	Producers	MO	Strong	Low	Grazing/herbivory/browsing	Direct	Europe	Yes	Negative
Cervus_nippon	Cervidae	Cetartiodactyla	R_236	1986	Producers	MO	Strong	Low	Grazing/herbivory/browsing	Direct	Europe	Yes	Negative
Cervus_nippon	Cervidae	Cetartiodactyla	R_236	1986	Producers	MO	Strong	Low	Grazing/herbivory/browsing	Direct	Europe	Yes	Negative
Cervus_nippon	Cervidae	Cetartiodactyla	R_236	1986	Producers	MO	Strong	Low	Grazing/herbivory/browsing	Direct	Europe	Yes	Negative
Cervus_nippon	Cervidae	Cetartiodactyla	R_236	1986	Producers	MO	Strong	Low	Grazing/herbivory/browsing	Direct	Europe	Yes	Negative
Cervus_nippon	Cervidae	Cetartiodactyla	R_236	1986	Producers	MO	Strong	Low	Grazing/herbivory/browsing	Direct	Europe	Yes	Negative
Cervus_nippon	Cervidae	Cetartiodactyla	R_236	1986	Producers	MO	Strong	Low	Grazing/herbivory/browsing	Direct	Europe	Yes	Negative
Dama_dama	Cervidae	Cetartiodactyla	R_236	1986	Producers	MO	Strong	Low	Grazing/herbivory/browsing	Direct	Europe	Yes	Negative
Dama_dama	Cervidae	Cetartiodactyla	R_236	1986	Producers	MO	Strong	Low	Grazing/herbivory/browsing	Direct	Europe	Yes	Negative
Dama_dama	Cervidae	Cetartiodactyla	R_236	1986	Producers	MO	Strong	Low	Grazing/herbivory/browsing	Direct	Europe	Yes	Negative
Dama_dama	Cervidae	Cetartiodactyla	R_236	1986	Producers	MO	Strong	Low	Grazing/herbivory/browsing	Direct	Europe	Yes	Negative
Dama_dama	Cervidae	Cetartiodactyla	R_236	1986	Producers	MO	Strong	Low	Grazing/herbivory/browsing	Direct	Europe	Yes	Negative
Dama_dama	Cervidae	Cetartiodactyla	R_236	1986	Producers	MO	Strong	Low	Grazing/herbivory/browsing	Direct	Europe	Yes	Negative
Dama_dama	Cervidae	Cetartiodactyla	R_236	1986	Producers	MO	Strong	Low	Grazing/herbivory/browsing	Direct	Europe	Yes	Negative
Dama_dama	Cervidae	Cetartiodactyla	R_236	1986	Producers	MO	Strong	Low	Grazing/herbivory/browsing	Direct	Europe	Yes	Negative
Dama_dama	Cervidae	Cetartiodactyla	R_236	1986	Producers	MO	Strong	Low	Grazing/herbivory/browsing	Direct	Europe	Yes	Negative
Dama_dama	Cervidae	Cetartiodactyla	R_236	1986	Producers	MO	Strong	Low	Grazing/herbivory/browsing	Direct	Europe	Yes	Negative
Dama_dama	Cervidae	Cetartiodactyla	R_236	1986	Producers	MO	Strong	Low	Grazing/herbivory/browsing	Direct	Europe	Yes	Negative
Dama_dama	Cervidae	Cetartiodactyla	R_236	1986	Producers	MO	Strong	Low	Grazing/herbivory/browsing	Direct	Europe	Yes	Negative
Dama_dama	Cervidae	Cetartiodactyla	R_236	1986	Producers	MO	Strong	Low	Grazing/herbivory/browsing	Direct	Europe	Yes	Negative
Dama_dama	Cervidae	Cetartiodactyla	R_236	1986	Producers	MO	Strong	Low	Grazing/herbivory/browsing	Direct	Europe	Yes	Negative
Dama_dama	Cervidae	Cetartiodactyla	R_236	1986	Producers	MO	Strong	Low	Grazing/herbivory/browsing	Direct	Europe	Yes	Negative
Dama_dama	Cervidae	Cetartiodactyla	R_236	1986	Producers	MO	Strong	Low	Grazing/herbivory/browsing	Direct	Europe	Yes	Negative
Dama_dama	Cervidae	Cetartiodactyla	R_236	1986	Producers	MO	Strong	Low	Grazing/herbivory/browsing	Direct	Europe	Yes	Negative
Dama_dama	Cervidae	Cetartiodactyla	R_236	1986	Producers	MO	Strong	Low	Grazing/herbivory/browsing	Direct	Europe	Yes	Negative
Dama_dama	Cervidae	Cetartiodactyla	R_236	1986	Producers	MO	Strong	Low	Grazing/herbivory/browsing	Direct	Europe	Yes	Negative
Dama_dama	Cervidae	Cetartiodactyla	R_236	1986	Producers	MO	Strong	Low	Grazing/herbivory/browsing	Direct	Europe	Yes	Negative
Dama_dama	Cervidae	Cetartiodactyla	R_236	1986	Producers	MO	Strong	Low	Grazing/herbivory/browsing	Direct	Europe	Yes	Negative
Muntiacus_reevesi	Cervidae	Cetartiodactyla	R_236	1986	Producers	MO	Strong	Low	Grazing/herbivory/browsing	Direct	Europe	Yes	Negative
Muntiacus_reevesi	Cervidae	Cetartiodactyla	R_236	1986	Producers	MO	Strong	Low	Grazing/herbivory/browsing	Direct	Europe	Yes	Negative
Muntiacus_reevesi	Cervidae	Cetartiodactyla	R_236	1986	Producers	MO	Strong	Low	Grazing/herbivory/browsing	Direct	Europe	Yes	Negative
Muntiacus_reevesi	Cervidae	Cetartiodactyla	R_236	1986	Producers	MO	Strong	Low	Grazing/herbivory/browsing	Direct	Europe	Yes	Negative
Muntiacus_reevesi	Cervidae	Cetartiodactyla	R_236	1986	Producers	MO	Strong	Low	Grazing/herbivory/browsing	Direct	Europe	Yes	Negative
Muntiacus_reevesi	Cervidae	Cetartiodactyla	R_236	1986	Producers	MO	Strong	Low	Grazing/herbivory/browsing	Direct	Europe	Yes	Negative
Muntiacus_reevesi	Cervidae	Cetartiodactyla	R_236	1986	Producers	MO	Strong	Low	Grazing/herbivory/browsing	Direct	Europe	Yes	Negative
Muntiacus_reevesi	Cervidae	Cetartiodactyla	R_236	1986	Producers	MO	Strong	Low	Grazing/herbivory/browsing	Direct	Europe	Yes	Negative
Muntiacus_reevesi	Cervidae	Cetartiodactyla	R_236	1986	Producers	MO	Strong	Low	Grazing/herbivory/browsing	Direct	Europe	Yes	Negative
Muntiacus_reevesi	Cervidae	Cetartiodactyla	R_236	1986	Producers	MO	Strong	Low	Grazing/herbivory/browsing	Direct	Europe	Yes	Negative
Muntiacus_reevesi	Cervidae	Cetartiodactyla	R_236	1986	Producers	MO	Strong	Low	Grazing/herbivory/browsing	Direct	Europe	Yes	Negative
Muntiacus_reevesi	Cervidae	Cetartiodactyla	R_236	1986	Producers	MO	Strong	Low	Grazing/herbivory/browsing	Direct	Europe	Yes	Negative
Muntiacus_reevesi	Cervidae	Cetartiodactyla	R_236	1986	Producers	MO	Strong	Low	Grazing/herbivory/browsing	Direct	Europe	Yes	Negative
Muntiacus_reevesi	Cervidae	Cetartiodactyla	R_236	1986	Producers	MO	Strong	Low	Grazing/herbivory/browsing	Direct	Europe	Yes	Negative
Muntiacus_reevesi	Cervidae	Cetartiodactyla	R_236	1986	Producers	MO	Strong	Low	Grazing/herbivory/browsing	Direct	Europe	Yes	Negative
Muntiacus_reevesi	Cervidae	Cetartiodactyla	R_236	1986	Producers	MO	Strong	Low	Grazing/herbivory/browsing	Direct	Europe	Yes	Negative
Muntiacus_reevesi	Cervidae	Cetartiodactyla	R_236	1986	Producers	MO	Strong	Low	Grazing/herbivory/browsing	Direct	Europe	Yes	Negative
Muntiacus_reevesi	Cervidae	Cetartiodactyla	R_236	1986	Producers	MO	Strong	Low	Grazing/herbivory/browsing	Direct	Europe	Yes	Negative
Muntiacus_reevesi	Cervidae	Cetartiodactyla	R_236	1986	Producers	MO	Strong	Low	Grazing/herbivory/browsing	Direct	Europe	Yes	Negative
Muntiacus_reevesi	Cervidae	Cetartiodactyla	R_236	1986	Producers	MO	Strong	Low	Grazing/herbivory/browsing	Direct	Europe	Yes	Negative
Dama_dama	Cervidae	Cetartiodactyla	R_237	1989	Producers	MR	Strong	Low	Grazing/herbivory/browsing	Direct	Europe	Yes	Negative
Dama_dama	Cervidae	Cetartiodactyla	R_237	1989	Producers	MR	Strong	Low	Grazing/herbivory/browsing	Direct	Europe	Yes	Negative
Dama_dama	Cervidae	Cetartiodactyla	R_237	1989	Producers	MR	Strong	Low	Grazing/herbivory/browsing	Direct	Europe	Yes	Negative
Dama_dama	Cervidae	Cetartiodactyla	R_237	1989	Producers	MR	Strong	Low	Grazing/herbivory/browsing	Direct	Europe	Yes	Negative
Dama_dama	Cervidae	Cetartiodactyla	R_237	1989	Secondary_consumers	MO	Strong	Low	Chemical, physical or structural impact on ecosystems	Indirect	Europe	Yes	Negative
Dama_dama	Cervidae	Cetartiodactyla	R_237	1989	Primary_consumers	MO	Strong	Low	Chemical, physical or structural impact on ecosystems	Indirect	Europe	Yes	Negative
Dama_dama	Cervidae	Cetartiodactyla	R_237	1989	Primary_consumers	MO	Strong	Low	Chemical, physical or structural impact on ecosystems	Indirect	Europe	Yes	Negative
Dama_dama	Cervidae	Cetartiodactyla	R_237	1989	Secondary_consumers	MO	Strong	Low	Chemical, physical or structural impact on ecosystems	Indirect	Europe	Yes	Negative
Dama_dama	Cervidae	Cetartiodactyla	R_237	1989	Producers	MO	Strong	Low	Grazing/herbivory/browsing	Direct	Europe	Yes	Negative
Dama_dama	Cervidae	Cetartiodactyla	R_237	1989	Producers	MO	Strong	Low	Grazing/herbivory/browsing	Direct	Europe	Yes	Negative
Dama_dama	Cervidae	Cetartiodactyla	R_237	1989	Producers	MO	Strong	Low	Grazing/herbivory/browsing	Direct	Europe	Yes	Negative
Dama_dama	Cervidae	Cetartiodactyla	R_237	1989	Producers	MO	Strong	Low	Grazing/herbivory/browsing	Direct	Europe	Yes	Negative
Dama_dama	Cervidae	Cetartiodactyla	R_237	1989	Producers	MO	Strong	Low	Grazing/herbivory/browsing	Direct	Europe	Yes	Negative
Dama_dama	Cervidae	Cetartiodactyla	R_237	1989	Producers	MO	Strong	Low	Grazing/herbivory/browsing	Direct	Europe	Yes	Negative
Dama_dama	Cervidae	Cetartiodactyla	R_237	1989	Producers	MO	Strong	Low	Grazing/herbivory/browsing	Direct	Europe	Yes	Negative
Dama_dama	Cervidae	Cetartiodactyla	R_237	1989	Producers	MO	Strong	Low	Grazing/herbivory/browsing	Direct	Europe	Yes	Negative
Dama_dama	Cervidae	Cetartiodactyla	R_237	1989	Secondary_consumers	MO	Strong	Low	Chemical, physical or structural impact on ecosystems	Indirect	Europe	Yes	Negative
Dama_dama	Cervidae	Cetartiodactyla	R_237	1989	Secondary_consumers	MO	Strong	Low	Chemical, physical or structural impact on ecosystems	Indirect	Europe	Yes	Negative
Dama_dama	Cervidae	Cetartiodactyla	R_237	1989	Producers	MR	Strong	Medium	(10) Indirect impacts through interactions with other taxa	Indirect	Europe	Yes	Positive
Dama_dama	Cervidae	Cetartiodactyla	R_237	1989	Producers	MR	Strong	Medium	(10) Indirect impacts through interactions with other taxa	Indirect	Europe	Yes	Positive
Dama_dama	Cervidae	Cetartiodactyla	R_237	1989	Producers	MR	Strong	Medium	(10) Indirect impacts through interactions with other taxa	Indirect	Europe	Yes	Positive
Dama_dama	Cervidae	Cetartiodactyla	R_237	1989	Producers	MR	Strong	Medium	(10) Indirect impacts through interactions with other taxa	Indirect	Europe	Yes	Positive
Dama_dama	Cervidae	Cetartiodactyla	R_237	1989	Producers	MO	Strong	High	(10) Indirect impacts through interactions with other taxa	Indirect	Europe	Yes	Positive
Dama_dama	Cervidae	Cetartiodactyla	R_237	1989	Producers	MO	Strong	High	(10) Indirect impacts through interactions with other taxa	Indirect	Europe	Yes	Positive
Dama_dama	Cervidae	Cetartiodactyla	R_237	1989	Secondary_consumers	MR	Strong	Medium	(10) Indirect impacts through interactions with other taxa	Indirect	Europe	Yes	Positive
Dama_dama	Cervidae	Cetartiodactyla	R_237	1989	Secondary_consumers	MR	Strong	Medium	(10) Indirect impacts through interactions with other taxa	Indirect	Europe	Yes	Positive
Dama_dama	Cervidae	Cetartiodactyla	R_237	1989	Primary_consumers	MO	Strong	High	(10) Indirect impacts through interactions with other taxa	Indirect	Europe	Yes	Positive
Bos_taurus	Bovidae	Cetartiodactyla	R_238	2005	Secondary_consumers	MN	Weak	Medium	(8) Physical impact on ecosystem	Indirect	North_and_Central_America	No	Positive
Rusa_unicolor	Cervidae	Cetartiodactyla	R_239	2012	Producers	MN	Weak	Medium	(5) Dispersal facilitation	Direct	Oceania	No	Positive
Rusa_unicolor	Cervidae	Cetartiodactyla	R_239	2021	Producers	MN	Weak	Medium	(5) Dispersal facilitation	Direct	Oceania	No	Positive
Rusa_unicolor	Cervidae	Cetartiodactyla	R_239	2021	Producers	MN	Weak	Medium	(5) Dispersal facilitation	Direct	Oceania	No	Positive
Rusa_unicolor	Cervidae	Cetartiodactyla	R_239	2021	Producers	MN	Weak	Medium	(5) Dispersal facilitation	Direct	Oceania	No	Positive
Rusa_unicolor	Cervidae	Cetartiodactyla	R_239	2021	Producers	MN	Weak	Medium	(5) Dispersal facilitation	Direct	Oceania	No	Positive
Rusa_unicolor	Cervidae	Cetartiodactyla	R_239	2021	Producers	MN	Weak	Medium	(5) Dispersal facilitation	Direct	Oceania	No	Positive
Ovis_orientalis	Bovidae	Cetartiodactyla	R_24	2002	Producers	MR	Strong	Low	Grazing/herbivory/browsing	Direct	North and Central America	Yes	Negative
Ovis_orientalis	Bovidae	Cetartiodactyla	R_24	2002	Producers	MO	Strong	Low	Grazing/herbivory/browsing	Direct	North and Central America	Yes	Negative
Ovis_orientalis	Bovidae	Cetartiodactyla	R_24	2002	Producers	MO	Strong	Low	Grazing/herbivory/browsing	Direct	North and Central America	Yes	Negative
Ovis_orientalis	Bovidae	Cetartiodactyla	R_24	2002	Producers	MO	Strong	Low	Grazing/herbivory/browsing	Direct	North and Central America	Yes	Negative
Ovis_orientalis	Bovidae	Cetartiodactyla	R_24	2002	Producers	MO	Strong	High	Grazing/herbivory/browsing	Direct	North and Central America	Yes	Negative
Ovis_orientalis	Bovidae	Cetartiodactyla	R_24	2002	Producers	MO	Strong	Medium	Grazing/herbivory/browsing	Direct	North and Central America	Yes	Negative
Ovis_orientalis	Bovidae	Cetartiodactyla	R_24	2002	Producers	MC	Weak	Low	Grazing/herbivory/browsing	Direct	North and Central America	Yes	Negative
Ovis_orientalis	Bovidae	Cetartiodactyla	R_24	2002	Producers	MC	Weak	Low	Grazing/herbivory/browsing	Direct	North and Central America	Yes	Negative
Odocoileus_hemionus	Cervidae	Cetartiodactyla	R_240	2012	Producers	MN	Weak	Medium	Grazing/herbivory/browsing	Direct	North and Central America	Yes	Negative
Bos_taurus	Bovidae	Cetartiodactyla	R_241	2010	Secondary_consumers	MO	Strong	Low	Chemical, physical or structural impact on ecosystems	Indirect	Oceania	No	Negative
Bos_taurus	Bovidae	Cetartiodactyla	R_241	2010	Secondary_consumers	MO	Strong	Low	Chemical, physical or structural impact on ecosystems	Indirect	Oceania	No	Negative
Bos_taurus	Bovidae	Cetartiodactyla	R_241	2010	Secondary_consumers	MO	Strong	Low	Chemical, physical or structural impact on ecosystems	Indirect	Oceania	No	Negative
Bos_taurus	Bovidae	Cetartiodactyla	R_241	2010	Secondary_consumers	MO	Strong	Low	Chemical, physical or structural impact on ecosystems	Indirect	Oceania	No	Negative
Bos_taurus	Bovidae	Cetartiodactyla	R_242	2002	Secondary_consumers	MO	Strong	High	(10) Indirect impacts through interactions with other taxa	Indirect	Oceania	No	Positive
Bos_taurus	Bovidae	Cetartiodactyla	R_242	2002	Secondary_consumers	MO	Strong	Medium	(10) Indirect impacts through interactions with other taxa	Indirect	Oceania	No	Positive
Oreamnos_americanus	Bovidae	Cetartiodactyla	R_243	2001	Primary_consumers	MO	Strong	Low	Transmission of diseases; Competition	Indirect	North and Central America	No	Negative
Axis_axis	Cervidae	Cetartiodactyla	R_244	1998	Producers	MN	Weak	Low	Grazing/herbivory/browsing	Direct	South America	No	Negative
Cervus_elaphus	Cervidae	Cetartiodactyla	R_244	1998	Producers	MN	Weak	Low	Grazing/herbivory/browsing	Direct	South America	No	Negative
Dama_dama	Cervidae	Cetartiodactyla	R_244	1998	Producers	MN	Weak	Low	Grazing/herbivory/browsing	Direct	South America	No	Negative
Cervus_elaphus	Cervidae	Cetartiodactyla	R_245	2010	Producers	MN	Weak	Low	Grazing/herbivory/browsing	Direct	South America	No	Negative
Dama_dama	Cervidae	Cetartiodactyla	R_245	2010	Producers	MN	Weak	Low	Grazing/herbivory/browsing	Direct	South America	No	Negative
Ovis_orientalis	Bovidae	Cetartiodactyla	R_246	2001	Producers	MO	Strong	Low	Grazing/herbivory/browsing	Direct	North and Central America	Yes	Negative
Ovis_orientalis	Bovidae	Cetartiodactyla	R_246	2001	Producers	MO	Strong	Low	Grazing/herbivory/browsing	Direct	North and Central America	Yes	Negative
Sus_scrofa	Suidae	Cetartiodactyla	R_246	2001	Producers	MO	Strong	Low	Grazing/herbivory/browsing	Direct	North and Central America	Yes	Negative
Sus_scrofa	Suidae	Cetartiodactyla	R_246	2001	Producers	MO	Strong	Low	Grazing/herbivory/browsing	Direct	North and Central America	Yes	Negative
Sus_scrofa	Suidae	Cetartiodactyla	R_247	2001	Secondary_consumers	MO	Strong	Medium	Indirect impact through interaction with other species	Indirect	North and Central America	Yes	Negative
Sus_scrofa	Suidae	Cetartiodactyla	R_248	2002	Secondary_consumers	MR	Strong	Low	(1) Provision of trophic resources	Direct	North_and_Central_America	Yes	Positive
Sus_scrofa	Suidae	Cetartiodactyla	R_248	2002	Secondary_consumers	MO	Strong	High	(10) Indirect impacts through interactions with other taxa	Indirect	North_and_Central_America	Yes	Positive
Equus_caballus	Equidae	Perissodactyla	R_249	1991	Producers	MO	Strong	Low	Grazing/herbivory/browsing; Direct physical disturbance	Direct	Oceania	Yes	Negative
Equus_caballus	Equidae	Perissodactyla	R_249	1991	Producers	MO	Strong	Low	Grazing/herbivory/browsing; Direct physical disturbance	Direct	Oceania	Yes	Negative
Equus_caballus	Equidae	Perissodactyla	R_249	1991	Producers	MO	Strong	Low	Grazing/herbivory/browsing; Direct physical disturbance	Direct	Oceania	Yes	Negative
Equus_caballus	Equidae	Perissodactyla	R_249	1991	Producers	MO	Strong	Low	Grazing/herbivory/browsing; Direct physical disturbance	Direct	Oceania	Yes	Negative
Equus_caballus	Equidae	Perissodactyla	R_249	1991	Producers	MO	Strong	Low	Grazing/herbivory/browsing; Direct physical disturbance	Direct	Oceania	Yes	Negative
Equus_caballus	Equidae	Perissodactyla	R_249	1991	Producers	MO	Strong	Low	Grazing/herbivory/browsing; Direct physical disturbance	Direct	Oceania	Yes	Negative
Equus_caballus	Equidae	Perissodactyla	R_249	1991	Producers	MO	Strong	Low	Grazing/herbivory/browsing; Direct physical disturbance	Direct	Oceania	Yes	Negative
Equus_caballus	Equidae	Perissodactyla	R_249	1991	Producers	MO	Strong	Medium	Grazing/herbivory/browsing; Direct physical disturbance	Direct	Oceania	Yes	Negative
Equus_caballus	Equidae	Perissodactyla	R_249	1991	Producers	MO	Strong	Medium	Grazing/herbivory/browsing; Direct physical disturbance	Direct	Oceania	Yes	Negative
Equus_caballus	Equidae	Perissodactyla	R_249	1991	Producers	MO	Strong	Low	Grazing/herbivory/browsing; Direct physical disturbance	Direct	Oceania	Yes	Negative
Equus_caballus	Equidae	Perissodactyla	R_249	1991	Producers	MO	Strong	Low	Grazing/herbivory/browsing; Direct physical disturbance	Direct	Oceania	Yes	Negative
Equus_caballus	Equidae	Perissodactyla	R_249	1991	Producers	MO	Strong	Low	Grazing/herbivory/browsing; Direct physical disturbance	Direct	Oceania	Yes	Negative
Equus_caballus	Equidae	Perissodactyla	R_249	1991	Producers	MO	Strong	Low	Grazing/herbivory/browsing; Direct physical disturbance	Direct	Oceania	Yes	Negative
Equus_caballus	Equidae	Perissodactyla	R_249	1991	Producers	MO	Strong	Low	Grazing/herbivory/browsing; Direct physical disturbance	Direct	Oceania	Yes	Negative
Equus_caballus	Equidae	Perissodactyla	R_249	1991	Producers	MO	Strong	Low	Grazing/herbivory/browsing; Direct physical disturbance	Direct	Oceania	Yes	Negative
Equus_caballus	Equidae	Perissodactyla	R_249	1991	Producers	MO	Strong	Low	Grazing/herbivory/browsing; Direct physical disturbance	Direct	Oceania	Yes	Negative
Equus_caballus	Equidae	Perissodactyla	R_249	1991	Producers	MO	Strong	Low	Grazing/herbivory/browsing; Direct physical disturbance	Direct	Oceania	Yes	Negative
Equus_caballus	Equidae	Perissodactyla	R_249	1991	Producers	MO	Strong	Low	Grazing/herbivory/browsing; Direct physical disturbance	Direct	Oceania	Yes	Negative
Equus_caballus	Equidae	Perissodactyla	R_249	1991	Producers	MN	Weak	Low	Grazing/herbivory/browsing; Direct physical disturbance	Direct	Oceania	Yes	Negative
Equus_caballus	Equidae	Perissodactyla	R_249	1991	Producers	MN	Weak	Low	Grazing/herbivory/browsing; Direct physical disturbance	Direct	Oceania	Yes	Negative
Equus_caballus	Equidae	Perissodactyla	R_249	1991	Producers	MN	Weak	Low	Grazing/herbivory/browsing; Direct physical disturbance	Direct	Oceania	Yes	Negative
Equus_caballus	Equidae	Perissodactyla	R_249	1991	Producers	MN	Weak	Low	Grazing/herbivory/browsing; Direct physical disturbance	Direct	Oceania	Yes	Negative
Equus_caballus	Equidae	Perissodactyla	R_249	1991	Producers	MN	Weak	Low	Grazing/herbivory/browsing; Direct physical disturbance	Direct	Oceania	Yes	Negative
Equus_caballus	Equidae	Perissodactyla	R_249	1991	Producers	MN	Weak	Low	Grazing/herbivory/browsing; Direct physical disturbance	Direct	Oceania	Yes	Negative
Odocoileus_virginianus	Cervidae	Cetartiodactyla	R_25	2003	Producers	MO	Strong	High	Grazing/herbivory/browsing	Direct	Oceania	Yes	Negative
Odocoileus_virginianus	Cervidae	Cetartiodactyla	R_25	2003	Producers	MN	Weak	High	Grazing/herbivory/browsing	Direct	Oceania	Yes	Negative
Odocoileus_virginianus	Cervidae	Cetartiodactyla	R_25	2003	Producers	MN	Weak	High	Grazing/herbivory/browsing	Direct	Oceania	Yes	Negative
Odocoileus_virginianus	Cervidae	Cetartiodactyla	R_25	2003	Producers	MN	Weak	High	Grazing/herbivory/browsing	Direct	Oceania	Yes	Negative
Odocoileus_virginianus	Cervidae	Cetartiodactyla	R_25	2003	Producers	MN	Weak	High	Grazing/herbivory/browsing	Direct	Oceania	Yes	Negative
Odocoileus_virginianus	Cervidae	Cetartiodactyla	R_25	2003	Producers	MN	Weak	High	Grazing/herbivory/browsing	Direct	Oceania	Yes	Negative
Odocoileus_virginianus	Cervidae	Cetartiodactyla	R_25	2003	Producers	MN	Weak	High	Grazing/herbivory/browsing	Direct	Oceania	Yes	Negative
Odocoileus_virginianus	Cervidae	Cetartiodactyla	R_25	2003	Producers	MN	Weak	High	Grazing/herbivory/browsing	Direct	Oceania	Yes	Negative
Odocoileus_virginianus	Cervidae	Cetartiodactyla	R_25	2003	Producers	MN	Weak	High	Grazing/herbivory/browsing	Direct	Oceania	Yes	Negative
Odocoileus_virginianus	Cervidae	Cetartiodactyla	R_25	2003	Producers	MC	Weak	Medium	Grazing/herbivory/browsing	Direct	Oceania	Yes	Negative
Odocoileus_virginianus	Cervidae	Cetartiodactyla	R_25	2003	Producers	MC	Weak	Medium	Grazing/herbivory/browsing	Direct	Oceania	Yes	Negative
Cervus_canadensis	Cervidae	Cetartiodactyla	R_250	1987	Producers	MO	Strong	High	Grazing/herbivory/browsing	Direct	Oceania	Yes	Negative
Cervus_canadensis	Cervidae	Cetartiodactyla	R_250	1987	Producers	MO	Strong	High	Grazing/herbivory/browsing	Direct	Oceania	Yes	Negative
Cervus_canadensis	Cervidae	Cetartiodactyla	R_250	1987	Producers	MO	Strong	High	Grazing/herbivory/browsing	Direct	Oceania	Yes	Negative
Cervus_canadensis	Cervidae	Cetartiodactyla	R_250	1987	Producers	MO	Strong	High	Grazing/herbivory/browsing	Direct	Oceania	Yes	Negative
Cervus_canadensis	Cervidae	Cetartiodactyla	R_250	1987	Producers	MO	Strong	High	Grazing/herbivory/browsing	Direct	Oceania	Yes	Negative
Cervus_canadensis	Cervidae	Cetartiodactyla	R_250	1987	Producers	MO	Strong	High	Grazing/herbivory/browsing	Direct	Oceania	Yes	Negative
Cervus_canadensis	Cervidae	Cetartiodactyla	R_250	1987	Producers	MO	Strong	High	Grazing/herbivory/browsing	Direct	Oceania	Yes	Negative
Cervus_canadensis	Cervidae	Cetartiodactyla	R_250	1987	Producers	MO	Strong	High	Grazing/herbivory/browsing	Direct	Oceania	Yes	Negative
Cervus_canadensis	Cervidae	Cetartiodactyla	R_250	1987	Producers	MO	Strong	High	Grazing/herbivory/browsing	Direct	Oceania	Yes	Negative
Cervus_canadensis	Cervidae	Cetartiodactyla	R_250	1987	Secondary_consumers	MO	Strong	Low	Competition; Indirect impacts through interactions with other species	Indirect	Oceania	Yes	Negative
Cervus_elaphus	Cervidae	Cetartiodactyla	R_250	1987	Producers	MO	Strong	High	Grazing/herbivory/browsing	Direct	Oceania	Yes	Negative
Cervus_elaphus	Cervidae	Cetartiodactyla	R_250	1987	Producers	MO	Strong	High	Grazing/herbivory/browsing	Direct	Oceania	Yes	Negative
Cervus_elaphus	Cervidae	Cetartiodactyla	R_250	1987	Producers	MO	Strong	High	Grazing/herbivory/browsing	Direct	Oceania	Yes	Negative
Cervus_elaphus	Cervidae	Cetartiodactyla	R_250	1987	Producers	MO	Strong	High	Grazing/herbivory/browsing	Direct	Oceania	Yes	Negative
Cervus_elaphus	Cervidae	Cetartiodactyla	R_250	1987	Producers	MO	Strong	High	Grazing/herbivory/browsing	Direct	Oceania	Yes	Negative
Cervus_elaphus	Cervidae	Cetartiodactyla	R_250	1987	Producers	MO	Strong	High	Grazing/herbivory/browsing	Direct	Oceania	Yes	Negative
Cervus_elaphus	Cervidae	Cetartiodactyla	R_250	1987	Producers	MO	Strong	High	Grazing/herbivory/browsing	Direct	Oceania	Yes	Negative
Cervus_elaphus	Cervidae	Cetartiodactyla	R_250	1987	Producers	MO	Strong	High	Grazing/herbivory/browsing	Direct	Oceania	Yes	Negative
Cervus_elaphus	Cervidae	Cetartiodactyla	R_250	1987	Producers	MO	Strong	High	Grazing/herbivory/browsing	Direct	Oceania	Yes	Negative
Cervus_elaphus	Cervidae	Cetartiodactyla	R_250	1987	Secondary_consumers	MO	Strong	Low	Competition; Indirect impacts through interactions with other species	Indirect	Oceania	Yes	Negative
Sus_scrofa	Suidae	Cetartiodactyla	R_251	2010	Producers	MN	Weak	Medium	Grazing/herbivory/browsing	Direct	South America	No	Negative
Bos_taurus	Bovidae	Cetartiodactyla	R_252	2015	Secondary_consumers	MO	Strong	High	(10) Indirect impacts through interactions with other taxa	Indirect	South_America	No	Positive
Bos_taurus	Bovidae	Cetartiodactyla	R_252	2015	Secondary_consumers	MO	Strong	Medium	(10) Indirect impacts through interactions with other taxa	Indirect	South_America	No	Positive
Bos_taurus	Bovidae	Cetartiodactyla	R_252	2015	Secondary_consumers	MO	Strong	Medium	(10) Indirect impacts through interactions with other taxa	Indirect	South_America	No	Positive
Bos_taurus	Bovidae	Cetartiodactyla	R_252	2015	Secondary_consumers	MO	Strong	Medium	(10) Indirect impacts through interactions with other taxa	Indirect	South_America	No	Positive
Bos_taurus	Bovidae	Cetartiodactyla	R_252	2015	Secondary_consumers	MO	Strong	Medium	(10) Indirect impacts through interactions with other taxa	Indirect	South_America	No	Positive
Bos_taurus	Bovidae	Cetartiodactyla	R_252	2015	Secondary_consumers	MO	Strong	High	(10) Indirect impacts through interactions with other taxa	Indirect	South_America	No	Positive
Bos_taurus	Bovidae	Cetartiodactyla	R_252	2015	Secondary_consumers	MO	Strong	Medium	(10) Indirect impacts through interactions with other taxa	Indirect	South_America	No	Positive
Bos_taurus	Bovidae	Cetartiodactyla	R_252	2015	Secondary_consumers	MO	Strong	Medium	(10) Indirect impacts through interactions with other taxa	Indirect	South_America	No	Positive
Bos_taurus	Bovidae	Cetartiodactyla	R_252	2015	Secondary_consumers	MO	Strong	Medium	(10) Indirect impacts through interactions with other taxa	Indirect	South_America	No	Positive
Bos_taurus	Bovidae	Cetartiodactyla	R_252	2015	Secondary_consumers	MO	Strong	High	(10) Indirect impacts through interactions with other taxa	Indirect	South_America	No	Positive
Bos_taurus	Bovidae	Cetartiodactyla	R_252	2015	Secondary_consumers	MO	Strong	Medium	(10) Indirect impacts through interactions with other taxa	Indirect	South_America	No	Positive
Bos_taurus	Bovidae	Cetartiodactyla	R_252	2015	Secondary_consumers	MO	Strong	Medium	(10) Indirect impacts through interactions with other taxa	Indirect	South_America	No	Positive
Bos_taurus	Bovidae	Cetartiodactyla	R_252	2015	Secondary_consumers	MO	Strong	High	(10) Indirect impacts through interactions with other taxa	Indirect	South_America	No	Positive
Bos_taurus	Bovidae	Cetartiodactyla	R_252	2015	Secondary_consumers	MO	Strong	Medium	(10) Indirect impacts through interactions with other taxa	Indirect	South_America	No	Positive
Bos_taurus	Bovidae	Cetartiodactyla	R_252	2015	Secondary_consumers	MO	Strong	Medium	(10) Indirect impacts through interactions with other taxa	Indirect	South_America	No	Positive
Bos_taurus	Bovidae	Cetartiodactyla	R_252	2015	Secondary_consumers	MO	Strong	Medium	(10) Indirect impacts through interactions with other taxa	Indirect	South_America	No	Positive
Bos_taurus	Bovidae	Cetartiodactyla	R_252	2015	Secondary_consumers	MO	Strong	Medium	(10) Indirect impacts through interactions with other taxa	Indirect	South_America	No	Positive
Bos_taurus	Bovidae	Cetartiodactyla	R_252	2015	Secondary_consumers	MO	Strong	Medium	(10) Indirect impacts through interactions with other taxa	Indirect	South_America	No	Positive
Bos_taurus	Bovidae	Cetartiodactyla	R_252	2015	Secondary_consumers	MO	Strong	High	(10) Indirect impacts through interactions with other taxa	Indirect	South_America	No	Positive
Oreamnos_americanus	Bovidae	Cetartiodactyla	R_253	1994	Producers	MO	Strong	Low	Grazing/herbivory/browsing	Direct	North and Central America	No	Negative
Oreamnos_americanus	Bovidae	Cetartiodactyla	R_253	1994	Producers	MO	Strong	Low	Grazing/herbivory/browsing	Direct	North and Central America	No	Negative
Oreamnos_americanus	Bovidae	Cetartiodactyla	R_253	1994	Producers	MO	Strong	Low	Grazing/herbivory/browsing	Direct	North and Central America	No	Negative
Oreamnos_americanus	Bovidae	Cetartiodactyla	R_253	1994	Producers	MO	Strong	Low	(10) Indirect impacts through interactions with other taxa	Indirect	North_and_Central_America	No	Positive
Oreamnos_americanus	Bovidae	Cetartiodactyla	R_254	1994	Producers	MO	Strong	Medium	Grazing/herbivory/browsing; Direct physical disturbance	Direct	North and Central America	No	Negative
Oreamnos_americanus	Bovidae	Cetartiodactyla	R_255	1994	Producers	MO	Strong	Medium	Grazing/herbivory/browsing	Direct	North and Central America	No	Negative
Oreamnos_americanus	Bovidae	Cetartiodactyla	R_255	1994	Producers	MO	Strong	Medium	Grazing/herbivory/browsing	Direct	North and Central America	No	Negative
Oreamnos_americanus	Bovidae	Cetartiodactyla	R_255	1994	Producers	MO	Strong	Medium	Grazing/herbivory/browsing	Direct	North and Central America	No	Negative
Oreamnos_americanus	Bovidae	Cetartiodactyla	R_255	1994	Producers	MO	Strong	Medium	Grazing/herbivory/browsing	Direct	North and Central America	No	Negative
Oreamnos_americanus	Bovidae	Cetartiodactyla	R_255	1994	Producers	MO	Strong	Medium	Grazing/herbivory/browsing	Direct	North and Central America	No	Negative
Oreamnos_americanus	Bovidae	Cetartiodactyla	R_255	1994	Producers	MO	Strong	Medium	Grazing/herbivory/browsing	Direct	North and Central America	No	Negative
Oreamnos_americanus	Bovidae	Cetartiodactyla	R_255	1994	Producers	MN	Weak	Low	(10) Indirect impacts through interactions with other taxa	Indirect	North_and_Central_America	No	Positive
Ovis_orientalis	Bovidae	Cetartiodactyla	R_256	1986	Secondary_consumers	MO	Strong	Low	Chemical, physical or structural impact on ecosystems	Indirect	North and Central America	Yes	Negative
Ovis_orientalis	Bovidae	Cetartiodactyla	R_256	1986	Secondary_consumers	MO	Strong	Low	Chemical, physical or structural impact on ecosystems	Indirect	North and Central America	Yes	Negative
Ovis_orientalis	Bovidae	Cetartiodactyla	R_256	1986	Secondary_consumers	MO	Strong	Low	Chemical, physical or structural impact on ecosystems	Indirect	North and Central America	Yes	Negative
Ovis_orientalis	Bovidae	Cetartiodactyla	R_256	1986	Secondary_consumers	MO	Strong	Low	Chemical, physical or structural impact on ecosystems	Indirect	North and Central America	Yes	Negative
Ovis_orientalis	Bovidae	Cetartiodactyla	R_256	1986	Secondary_consumers	MO	Strong	Low	Chemical, physical or structural impact on ecosystems	Indirect	North and Central America	Yes	Negative
Bos_taurus	Bovidae	Cetartiodactyla	R_257	1983	Producers	MO	Strong	Medium	Grazing/herbivory/browsing	Direct	North and Central America	Yes	Negative
Ovis_orientalis	Bovidae	Cetartiodactyla	R_258	1992	Producers	MN	Weak	Medium	Grazing/herbivory/browsing	Direct	North and Central America	Yes	Negative
Ovis_orientalis	Bovidae	Cetartiodactyla	R_258	1992	Producers	MN	Weak	Medium	Grazing/herbivory/browsing	Direct	North and Central America	Yes	Negative
Ovis_aries	Bovidae	Cetartiodactyla	R_259	1983	Producers	MO	Strong	Medium	Grazing/herbivory/browsing	Direct	North and Central America	Yes	Negative
Ovis_aries	Bovidae	Cetartiodactyla	R_259	1983	Producers	MO	Strong	Medium	Grazing/herbivory/browsing	Direct	North and Central America	Yes	Negative
Ovis_aries	Bovidae	Cetartiodactyla	R_259	1983	Producers	MO	Strong	Medium	Grazing/herbivory/browsing	Direct	North and Central America	Yes	Negative
Ovis_aries	Bovidae	Cetartiodactyla	R_259	1983	Producers	MO	Strong	Medium	Grazing/herbivory/browsing	Direct	North and Central America	Yes	Negative
Ovis_aries	Bovidae	Cetartiodactyla	R_259	1983	Producers	MO	Strong	Medium	Grazing/herbivory/browsing	Direct	North and Central America	Yes	Negative
Ovis_orientalis	Bovidae	Cetartiodactyla	R_259	1983	Producers	MN	Weak	Medium	Grazing/herbivory/browsing	Direct	North and Central America	Yes	Negative
Capra_hircus	Bovidae	Cetartiodactyla	R_26	2006	Producers	MO	Strong	Low	Grazing/herbivory/browsing; Direct physical disturbance	Direct	Europe	Yes	Negative
Capra_hircus	Bovidae	Cetartiodactyla	R_26	2006	Producers	MO	Strong	Low	Grazing/herbivory/browsing; Direct physical disturbance	Direct	Europe	Yes	Negative
Capra_hircus	Bovidae	Cetartiodactyla	R_26	2006	Producers	MO	Strong	Low	Grazing/herbivory/browsing; Direct physical disturbance	Direct	Europe	Yes	Negative
Capra_hircus	Bovidae	Cetartiodactyla	R_26	2006	Producers	MO	Strong	Low	Grazing/herbivory/browsing; Direct physical disturbance	Direct	Europe	Yes	Negative
Capra_hircus	Bovidae	Cetartiodactyla	R_26	2006	Producers	MO	Strong	Low	Grazing/herbivory/browsing; Direct physical disturbance	Direct	Europe	Yes	Negative
Capra_hircus	Bovidae	Cetartiodactyla	R_26	2006	Producers	MO	Strong	Low	Grazing/herbivory/browsing; Direct physical disturbance	Direct	Europe	Yes	Negative
Capra_hircus	Bovidae	Cetartiodactyla	R_26	2006	Producers	MO	Strong	Low	Grazing/herbivory/browsing; Direct physical disturbance	Direct	Europe	Yes	Negative
Capra_hircus	Bovidae	Cetartiodactyla	R_26	2006	Producers	MO	Strong	Low	Grazing/herbivory/browsing; Direct physical disturbance	Direct	Europe	Yes	Negative
Capra_hircus	Bovidae	Cetartiodactyla	R_26	2006	Producers	MO	Strong	Low	Grazing/herbivory/browsing; Direct physical disturbance	Direct	Europe	Yes	Negative
Capra_hircus	Bovidae	Cetartiodactyla	R_26	2006	Producers	MO	Strong	Low	Grazing/herbivory/browsing; Direct physical disturbance	Direct	Europe	Yes	Negative
Capra_hircus	Bovidae	Cetartiodactyla	R_26	2006	Producers	MO	Strong	Low	Grazing/herbivory/browsing; Direct physical disturbance	Direct	Europe	Yes	Negative
Capra_hircus	Bovidae	Cetartiodactyla	R_26	2006	Producers	MO	Strong	Low	Grazing/herbivory/browsing; Direct physical disturbance	Direct	Europe	Yes	Negative
Capra_hircus	Bovidae	Cetartiodactyla	R_26	2006	Producers	MO	Strong	Low	Grazing/herbivory/browsing; Direct physical disturbance	Direct	Europe	Yes	Negative
Capra_hircus	Bovidae	Cetartiodactyla	R_26	2006	Producers	MO	Strong	Low	Grazing/herbivory/browsing; Direct physical disturbance	Direct	Europe	Yes	Negative
Capra_hircus	Bovidae	Cetartiodactyla	R_26	2006	Producers	MO	Strong	Low	Grazing/herbivory/browsing; Direct physical disturbance	Direct	Europe	Yes	Negative
Capra_hircus	Bovidae	Cetartiodactyla	R_26	2006	Producers	MO	Strong	Low	Grazing/herbivory/browsing; Direct physical disturbance	Direct	Europe	Yes	Negative
Capra_hircus	Bovidae	Cetartiodactyla	R_26	2006	Producers	MO	Strong	Low	Grazing/herbivory/browsing; Direct physical disturbance	Direct	Europe	Yes	Negative
Capra_hircus	Bovidae	Cetartiodactyla	R_26	2006	Producers	MO	Strong	Low	Grazing/herbivory/browsing; Direct physical disturbance	Direct	Europe	Yes	Negative
Capra_hircus	Bovidae	Cetartiodactyla	R_260	1983	Producers	MN	Weak	Medium	Grazing/herbivory/browsing	Direct	North and Central America	Yes	Negative
Ovis_aries	Bovidae	Cetartiodactyla	R_260	1983	Producers	MN	Weak	Medium	Grazing/herbivory/browsing	Direct	North and Central America	Yes	Negative
Ovis_orientalis	Bovidae	Cetartiodactyla	R_260	1983	Producers	MN	Weak	Medium	Grazing/herbivory/browsing	Direct	North and Central America	Yes	Negative
Equus_caballus	Equidae	Perissodactyla	R_261	2003	Producers	MO	Strong	Medium	Grazing/herbivory/browsing	Direct	North and Central America	Yes	Negative
Equus_caballus	Equidae	Perissodactyla	R_261	2003	Producers	MO	Strong	Medium	Grazing/herbivory/browsing	Direct	North and Central America	Yes	Negative
Sus_scrofa	Suidae	Cetartiodactyla	R_262	2009	Producers	MO	Strong	High	Grazing/herbivory/browsing	Direct	North and Central America	No	Negative
Sus_scrofa	Suidae	Cetartiodactyla	R_262	2009	Producers	MO	Strong	High	Grazing/herbivory/browsing	Direct	North and Central America	No	Negative
Sus_scrofa	Suidae	Cetartiodactyla	R_262	2009	Producers	MO	Strong	High	Grazing/herbivory/browsing	Direct	North and Central America	No	Negative
Sus_scrofa	Suidae	Cetartiodactyla	R_262	2009	Producers	MO	Strong	High	Grazing/herbivory/browsing	Direct	North and Central America	No	Negative
Sus_scrofa	Suidae	Cetartiodactyla	R_262	2009	Producers	MO	Strong	High	Grazing/herbivory/browsing	Direct	North and Central America	No	Negative
Sus_scrofa	Suidae	Cetartiodactyla	R_262	2009	Producers	MO	Strong	High	Grazing/herbivory/browsing	Direct	North and Central America	No	Negative
Sus_scrofa	Suidae	Cetartiodactyla	R_262	2009	Producers	MO	Strong	High	Grazing/herbivory/browsing	Direct	North and Central America	No	Negative
Sus_scrofa	Suidae	Cetartiodactyla	R_262	2009	Producers	MO	Strong	High	Grazing/herbivory/browsing	Direct	North and Central America	No	Negative
Sus_scrofa	Suidae	Cetartiodactyla	R_262	2009	Producers	MO	Strong	High	Grazing/herbivory/browsing	Direct	North and Central America	No	Negative
Sus_scrofa	Suidae	Cetartiodactyla	R_262	2009	Producers	MO	Strong	High	Grazing/herbivory/browsing	Direct	North and Central America	No	Negative
Capra_hircus	Bovidae	Cetartiodactyla	R_263	1983	Secondary_consumers	MO	Strong	Low	Chemical, physical or structural impact on ecosystems	Indirect	South America	No	Negative
Capra_hircus	Bovidae	Cetartiodactyla	R_263	1983	Secondary_consumers	MO	Strong	Low	Chemical, physical or structural impact on ecosystems	Indirect	South America	No	Negative
Capra_hircus	Bovidae	Cetartiodactyla	R_263	1983	Secondary_consumers	MO	Strong	Low	Chemical, physical or structural impact on ecosystems	Indirect	South America	No	Negative
Dama_dama	Cervidae	Cetartiodactyla	R_264	1995	Producers	MN	Weak	Low	Grazing/herbivory/browsing	Direct	Oceania	Yes	Negative
Dama_dama	Cervidae	Cetartiodactyla	R_264	1995	Producers	MN	Weak	Low	Grazing/herbivory/browsing	Direct	Oceania	Yes	Negative
Dama_dama	Cervidae	Cetartiodactyla	R_264	1995	Producers	MN	Weak	Low	Grazing/herbivory/browsing	Direct	Oceania	Yes	Negative
Dama_dama	Cervidae	Cetartiodactyla	R_264	1995	Producers	MO	Strong	Medium	(10) Indirect impacts through interactions with other taxa	Indirect	Oceania	Yes	Positive
Dama_dama	Cervidae	Cetartiodactyla	R_264	1995	Producers	MN	Weak	Medium	(10) Indirect impacts through interactions with other taxa	Indirect	Oceania	Yes	Positive
Cervus_canadensis	Cervidae	Cetartiodactyla	R_265	2015	Producers	MN	Weak	Medium	Grazing/herbivory/browsing	Direct	North and Central America	No	Negative
Cervus_nippon	Cervidae	Cetartiodactyla	R_266	2014	Primary_consumers	MC	Weak	Medium	Hybridisation	Direct	Europe	Yes	Negative
Cervus_nippon	Cervidae	Cetartiodactyla	R_266	2014	Primary_consumers	MR	Strong	High	Hybridisation	Direct	Europe	Yes	Negative
Cervus_nippon	Cervidae	Cetartiodactyla	R_266	2014	Primary_consumers	MC	Weak	High	Hybridisation	Direct	Europe	Yes	Negative
Cervus_nippon	Cervidae	Cetartiodactyla	R_266	2014	Primary_consumers	MC	Weak	Medium	(3) Hybridisation	Direct	Europe	Yes	Positive
Cervus_nippon	Cervidae	Cetartiodactyla	R_266	2014	Primary_consumers	MC	Weak	High	(3) Hybridisation	Direct	Europe	Yes	Positive
Cervus_nippon	Cervidae	Cetartiodactyla	R_267	2018	Primary_consumers	MO	Strong	High	Hybridisation	Direct	Europe	Yes	Negative
Cervus_nippon	Cervidae	Cetartiodactyla	R_267	2018	Primary_consumers	MN	Weak	High	Hybridisation	Direct	Europe	Yes	Negative
Cervus_nippon	Cervidae	Cetartiodactyla	R_267	2018	Primary_consumers	MC	Weak	High	Hybridisation	Direct	Europe	Yes	Negative
Cervus_nippon	Cervidae	Cetartiodactyla	R_267	2018	Primary_consumers	MC	Weak	High	(3) Hybridisation	Direct	Europe	Yes	Positive
Capra_hircus	Bovidae	Cetartiodactyla	R_268	1973	Producers	MN	Weak	Medium	Grazing/herbivory/browsing; Direct physical disturbance	Direct	North and Central America	Yes	Negative
Odocoileus_virginianus	Cervidae	Cetartiodactyla	R_269	1989	Producers	MO	Strong	High	Grazing/herbivory/browsing; Direct physical disturbance	Direct	Oceania	Yes	Negative
Odocoileus_virginianus	Cervidae	Cetartiodactyla	R_269	1989	Producers	MN	Weak	Medium	Grazing/herbivory/browsing; Direct physical disturbance	Direct	Oceania	Yes	Negative
Odocoileus_virginianus	Cervidae	Cetartiodactyla	R_269	1989	Producers	MN	Weak	Medium	Grazing/herbivory/browsing; Direct physical disturbance	Direct	Oceania	Yes	Negative
Odocoileus_virginianus	Cervidae	Cetartiodactyla	R_269	1989	Producers	MN	Weak	Medium	Grazing/herbivory/browsing; Direct physical disturbance	Direct	Oceania	Yes	Negative
Odocoileus_virginianus	Cervidae	Cetartiodactyla	R_269	1989	Producers	MN	Weak	Medium	Grazing/herbivory/browsing; Direct physical disturbance	Direct	Oceania	Yes	Negative
Odocoileus_virginianus	Cervidae	Cetartiodactyla	R_269	1989	Producers	MN	Weak	Medium	Grazing/herbivory/browsing; Direct physical disturbance	Direct	Oceania	Yes	Negative
Odocoileus_virginianus	Cervidae	Cetartiodactyla	R_269	1989	Producers	MN	Weak	Medium	Grazing/herbivory/browsing; Direct physical disturbance	Direct	Oceania	Yes	Negative
Odocoileus_virginianus	Cervidae	Cetartiodactyla	R_269	1989	Producers	MN	Weak	Medium	Grazing/herbivory/browsing; Direct physical disturbance	Direct	Oceania	Yes	Negative
Odocoileus_virginianus	Cervidae	Cetartiodactyla	R_269	1989	Producers	MN	Weak	Medium	Grazing/herbivory/browsing; Direct physical disturbance	Direct	Oceania	Yes	Negative
Odocoileus_virginianus	Cervidae	Cetartiodactyla	R_269	1989	Producers	MN	Weak	Medium	Grazing/herbivory/browsing; Direct physical disturbance	Direct	Oceania	Yes	Negative
Odocoileus_virginianus	Cervidae	Cetartiodactyla	R_269	1989	Producers	MN	Weak	Medium	Grazing/herbivory/browsing; Direct physical disturbance	Direct	Oceania	Yes	Negative
Oryx_gazella	Bovidae	Cetartiodactyla	R_27	2003	Primary_consumers	MO	Strong	Low	Competition	Indirect	North and Central America	No	Negative
Oryx_gazella	Bovidae	Cetartiodactyla	R_27	2003	Primary_consumers	MO	Strong	Low	Competition	Indirect	North and Central America	No	Negative
Cervus_canadensis	Cervidae	Cetartiodactyla	R_270	1987	Producers	MN	Weak	Low	Grazing/herbivory/browsing	Direct	Oceania	Yes	Negative
Cervus_canadensis	Cervidae	Cetartiodactyla	R_270	1987	Producers	MN	Weak	Low	Grazing/herbivory/browsing	Direct	Oceania	Yes	Negative
Cervus_canadensis	Cervidae	Cetartiodactyla	R_270	1987	Producers	MN	Weak	Low	Grazing/herbivory/browsing	Direct	Oceania	Yes	Negative
Cervus_canadensis	Cervidae	Cetartiodactyla	R_270	1987	Producers	MN	Weak	Low	Grazing/herbivory/browsing	Direct	Oceania	Yes	Negative
Cervus_canadensis	Cervidae	Cetartiodactyla	R_270	1987	Producers	MN	Weak	Low	Grazing/herbivory/browsing	Direct	Oceania	Yes	Negative
Cervus_canadensis	Cervidae	Cetartiodactyla	R_270	1987	Producers	MN	Weak	Low	Grazing/herbivory/browsing	Direct	Oceania	Yes	Negative
Cervus_canadensis	Cervidae	Cetartiodactyla	R_270	1987	Producers	MN	Weak	Low	Grazing/herbivory/browsing	Direct	Oceania	Yes	Negative
Cervus_canadensis	Cervidae	Cetartiodactyla	R_270	1987	Producers	MN	Weak	Low	Grazing/herbivory/browsing	Direct	Oceania	Yes	Negative
Cervus_canadensis	Cervidae	Cetartiodactyla	R_270	1987	Producers	MN	Weak	Low	Grazing/herbivory/browsing	Direct	Oceania	Yes	Negative
Cervus_canadensis	Cervidae	Cetartiodactyla	R_270	1987	Producers	MN	Weak	Low	Grazing/herbivory/browsing	Direct	Oceania	Yes	Negative
Bubalus_bubalis	Bovidae	Cetartiodactyla	R_271	1971	Producers	MO	Strong	Medium	Direct physical disturbance	Direct	Oceania	No	Negative
Odocoileus_hemionus	Cervidae	Cetartiodactyla	R_272	2008	Producers	MN	Weak	Medium	Grazing/herbivory/browsing	Direct	North and Central America	Yes	Negative
Odocoileus_hemionus	Cervidae	Cetartiodactyla	R_272	2008	Producers	MN	Weak	Medium	(5) Dispersal facilitation	Direct	North_and_Central_America	Yes	Positive
Rusa_timorensis	Cervidae	Cetartiodactyla	R_273	1998	Producers	MO	Strong	Low	Grazing/herbivory/browsing	Direct	Oceania	Yes	Negative
Equus_caballus	Equidae	Perissodactyla	R_274	2008	Producers	MO	Strong	Low	Grazing/herbivory/browsing; Direct physical disturbance	Direct	North and Central America	Yes	Negative
Equus_caballus	Equidae	Perissodactyla	R_274	2008	Producers	MO	Strong	Low	Grazing/herbivory/browsing; Direct physical disturbance	Direct	North and Central America	Yes	Negative
Equus_caballus	Equidae	Perissodactyla	R_274	2008	Producers	MO	Strong	Low	Grazing/herbivory/browsing; Direct physical disturbance	Direct	North and Central America	Yes	Negative
Equus_caballus	Equidae	Perissodactyla	R_274	2008	Producers	MO	Strong	Low	Grazing/herbivory/browsing; Direct physical disturbance	Direct	North and Central America	Yes	Negative
Cervus_nippon	Cervidae	Cetartiodactyla	R_275	1999	Primary_consumers	MO	Strong	High	Hybridisation	Direct	Europe	Yes	Negative
Cervus_nippon	Cervidae	Cetartiodactyla	R_275	1999	Primary_consumers	MC	Weak	Medium	Hybridisation	Direct	Europe	Yes	Negative
Cervus_nippon	Cervidae	Cetartiodactyla	R_275	1999	Primary_consumers	MN	Weak	Medium	Hybridisation	Direct	Europe	Yes	Negative
Cervus_nippon	Cervidae	Cetartiodactyla	R_275	1999	Primary_consumers	MC	Weak	Low	Hybridisation	Direct	Europe	Yes	Negative
Cervus_nippon	Cervidae	Cetartiodactyla	R_275	1999	Primary_consumers	MC	Weak	Medium	(3) Hybridisation	Direct	Europe	Yes	Positive
Cervus_nippon	Cervidae	Cetartiodactyla	R_275	1999	Primary_consumers	MC	Weak	Low	(3) Hybridisation	Direct	Europe	Yes	Positive
Sus_scrofa	Suidae	Cetartiodactyla	R_276	2002	Producers	MN	Weak	Medium	Direct physical disturbance	Direct	North and Central America	No	Negative
Sus_scrofa	Suidae	Cetartiodactyla	R_276	2002	Producers	MN	Weak	Medium	Direct physical disturbance	Direct	North and Central America	No	Negative
Sus_scrofa	Suidae	Cetartiodactyla	R_276	2002	Producers	MN	Weak	Medium	Direct physical disturbance	Direct	North and Central America	No	Negative
Sus_scrofa	Suidae	Cetartiodactyla	R_276	2002	Producers	MN	Weak	Medium	Direct physical disturbance	Direct	North and Central America	No	Negative
Sus_scrofa	Suidae	Cetartiodactyla	R_276	2002	Producers	MN	Weak	Medium	Direct physical disturbance	Direct	North and Central America	No	Negative
Sus_scrofa	Suidae	Cetartiodactyla	R_277	2008	Producers	MN	Weak	Medium	Direct physical disturbance	Direct	North and Central America	No	Negative
Sus_scrofa	Suidae	Cetartiodactyla	R_277	2008	Producers	MN	Weak	Medium	Direct physical disturbance	Direct	North and Central America	No	Negative
Sus_scrofa	Suidae	Cetartiodactyla	R_277	2008	Producers	MN	Weak	Medium	Direct physical disturbance	Direct	North and Central America	No	Negative
Sus_scrofa	Suidae	Cetartiodactyla	R_277	2008	Producers	MN	Weak	Medium	Direct physical disturbance	Direct	North and Central America	No	Negative
Sus_scrofa	Suidae	Cetartiodactyla	R_277	2008	Producers	MN	Weak	Medium	Direct physical disturbance	Direct	North and Central America	No	Negative
Cervus_elaphus	Cervidae	Cetartiodactyla	R_278	2009	Producers	MO	Strong	Medium	Grazing/herbivory/browsing	Direct	Oceania	Yes	Negative
Cervus_elaphus	Cervidae	Cetartiodactyla	R_278	2009	Producers	MO	Strong	Medium	Grazing/herbivory/browsing	Direct	Oceania	Yes	Negative
Sus_scrofa	Suidae	Cetartiodactyla	R_279	2011	Decomposers	MC	Weak	Low	Predation	Direct	Oceania	No	Negative
Sus_scrofa	Suidae	Cetartiodactyla	R_279	2011	Producers	MN	Weak	Medium	Direct physical disturbance	Direct	Oceania	No	Negative
Sus_scrofa	Suidae	Cetartiodactyla	R_279	2011	Producers	MN	Weak	Medium	Direct physical disturbance	Direct	Oceania	No	Negative
Sus_scrofa	Suidae	Cetartiodactyla	R_279	2011	Producers	MN	Weak	Medium	Direct physical disturbance	Direct	Oceania	No	Negative
Sus_scrofa	Suidae	Cetartiodactyla	R_279	2011	Producers	MN	Weak	Medium	Direct physical disturbance	Direct	Oceania	No	Negative
Sus_scrofa	Suidae	Cetartiodactyla	R_279	2011	Producers	MN	Weak	Medium	Direct physical disturbance	Direct	Oceania	No	Negative
Sus_scrofa	Suidae	Cetartiodactyla	R_279	2011	Producers	MN	Weak	Medium	Direct physical disturbance	Direct	Oceania	No	Negative
Sus_scrofa	Suidae	Cetartiodactyla	R_279	2011	Producers	MN	Weak	Medium	Direct physical disturbance	Direct	Oceania	No	Negative
Sus_scrofa	Suidae	Cetartiodactyla	R_279	2011	Producers	MN	Weak	Medium	Direct physical disturbance	Direct	Oceania	No	Negative
Ovis_orientalis	Bovidae	Cetartiodactyla	R_28	2008	Producers	MO	Strong	Low	Grazing/herbivory/browsing	Direct	North and Central America	Yes	Negative
Ovis_orientalis	Bovidae	Cetartiodactyla	R_28	2008	Producers	MO	Strong	Low	Grazing/herbivory/browsing	Direct	North and Central America	Yes	Negative
Ovis_orientalis	Bovidae	Cetartiodactyla	R_28	2008	Producers	MO	Strong	Low	Grazing/herbivory/browsing	Direct	North and Central America	Yes	Negative
Ovis_orientalis	Bovidae	Cetartiodactyla	R_28	2008	Producers	MN	Weak	Medium	Grazing/herbivory/browsing	Direct	North and Central America	Yes	Negative
Rusa_unicolor	Cervidae	Cetartiodactyla	R_280	2022	Secondary_consumers	MN	Weak	Medium	(1) Provision of trophic resources	Direct	Oceania	No	Positive
Odocoileus_virginianus	Cervidae	Cetartiodactyla	R_281	2007	Producers	MN	Weak	Medium	Grazing/herbivory/browsing	Direct	North and Central America	Yes	Negative
Odocoileus_virginianus	Cervidae	Cetartiodactyla	R_282	2005	Producers	MO	Strong	Medium	Grazing/herbivory/browsing	Direct	North and Central America	Yes	Negative
Odocoileus_virginianus	Cervidae	Cetartiodactyla	R_282	2005	Producers	MO	Strong	Medium	Grazing/herbivory/browsing	Direct	North and Central America	Yes	Negative
Odocoileus_virginianus	Cervidae	Cetartiodactyla	R_282	2005	Producers	MO	Strong	Medium	Grazing/herbivory/browsing	Direct	North and Central America	Yes	Negative
Odocoileus_virginianus	Cervidae	Cetartiodactyla	R_282	2005	Producers	MO	Strong	Medium	Grazing/herbivory/browsing	Direct	North and Central America	Yes	Negative
Odocoileus_virginianus	Cervidae	Cetartiodactyla	R_282	2005	Producers	MO	Strong	Medium	Grazing/herbivory/browsing	Direct	North and Central America	Yes	Negative
Odocoileus_virginianus	Cervidae	Cetartiodactyla	R_282	2005	Producers	MO	Strong	Medium	Grazing/herbivory/browsing	Direct	North and Central America	Yes	Negative
Odocoileus_virginianus	Cervidae	Cetartiodactyla	R_282	2005	Producers	MO	Strong	Medium	Grazing/herbivory/browsing	Direct	North and Central America	Yes	Negative
Odocoileus_virginianus	Cervidae	Cetartiodactyla	R_282	2005	Producers	MO	Strong	Medium	Grazing/herbivory/browsing	Direct	North and Central America	Yes	Negative
Odocoileus_virginianus	Cervidae	Cetartiodactyla	R_282	2005	Producers	MO	Strong	Medium	Grazing/herbivory/browsing	Direct	North and Central America	Yes	Negative
Odocoileus_virginianus	Cervidae	Cetartiodactyla	R_282	2005	Producers	MO	Strong	Medium	Grazing/herbivory/browsing	Direct	North and Central America	Yes	Negative
Odocoileus_virginianus	Cervidae	Cetartiodactyla	R_282	2005	Producers	MO	Strong	Medium	Grazing/herbivory/browsing	Direct	North and Central America	Yes	Negative
Odocoileus_virginianus	Cervidae	Cetartiodactyla	R_283	2006	Producers	MN	Weak	Medium	Grazing/herbivory/browsing	Direct	North and Central America	Yes	Negative
Odocoileus_virginianus	Cervidae	Cetartiodactyla	R_283	2006	Producers	MN	Weak	Medium	Grazing/herbivory/browsing	Direct	North and Central America	Yes	Negative
Odocoileus_virginianus	Cervidae	Cetartiodactyla	R_283	2006	Producers	MN	Weak	Medium	Grazing/herbivory/browsing	Direct	North and Central America	Yes	Negative
Odocoileus_virginianus	Cervidae	Cetartiodactyla	R_283	2006	Producers	MN	Weak	Medium	Grazing/herbivory/browsing	Direct	North and Central America	Yes	Negative
Odocoileus_virginianus	Cervidae	Cetartiodactyla	R_283	2006	Producers	MN	Weak	Medium	Grazing/herbivory/browsing	Direct	North and Central America	Yes	Negative
Odocoileus_virginianus	Cervidae	Cetartiodactyla	R_283	2006	Producers	MN	Weak	Medium	Grazing/herbivory/browsing	Direct	North and Central America	Yes	Negative
Odocoileus_virginianus	Cervidae	Cetartiodactyla	R_283	2006	Producers	MN	Weak	Medium	Grazing/herbivory/browsing	Direct	North and Central America	Yes	Negative
Odocoileus_virginianus	Cervidae	Cetartiodactyla	R_283	2006	Producers	MN	Weak	Medium	Grazing/herbivory/browsing	Direct	North and Central America	Yes	Negative
Odocoileus_virginianus	Cervidae	Cetartiodactyla	R_283	2006	Producers	MN	Weak	Medium	Grazing/herbivory/browsing	Direct	North and Central America	Yes	Negative
Odocoileus_virginianus	Cervidae	Cetartiodactyla	R_283	2006	Producers	MN	Weak	Medium	Grazing/herbivory/browsing	Direct	North and Central America	Yes	Negative
Odocoileus_virginianus	Cervidae	Cetartiodactyla	R_283	2006	Producers	MN	Weak	Medium	Grazing/herbivory/browsing	Direct	North and Central America	Yes	Negative
Odocoileus_virginianus	Cervidae	Cetartiodactyla	R_283	2006	Producers	MN	Weak	Medium	Grazing/herbivory/browsing	Direct	North and Central America	Yes	Negative
Odocoileus_virginianus	Cervidae	Cetartiodactyla	R_283	2006	Producers	MN	Weak	Medium	Grazing/herbivory/browsing	Direct	North and Central America	Yes	Negative
Odocoileus_virginianus	Cervidae	Cetartiodactyla	R_283	2006	Producers	MN	Weak	Medium	Grazing/herbivory/browsing	Direct	North and Central America	Yes	Negative
Odocoileus_virginianus	Cervidae	Cetartiodactyla	R_283	2006	Producers	MN	Weak	Medium	Grazing/herbivory/browsing	Direct	North and Central America	Yes	Negative
Odocoileus_virginianus	Cervidae	Cetartiodactyla	R_283	2006	Producers	MC	Weak	High	Indirect impact through interaction with other species	Indirect	North and Central America	Yes	Negative
Odocoileus_virginianus	Cervidae	Cetartiodactyla	R_283	2006	Producers	MC	Weak	High	Indirect impact through interaction with other species	Indirect	North and Central America	Yes	Negative
Odocoileus_virginianus	Cervidae	Cetartiodactyla	R_283	2006	Producers	MC	Weak	High	Indirect impact through interaction with other species	Indirect	North and Central America	Yes	Negative
Odocoileus_virginianus	Cervidae	Cetartiodactyla	R_283	2006	Producers	MC	Weak	High	Indirect impact through interaction with other species	Indirect	North and Central America	Yes	Negative
Odocoileus_virginianus	Cervidae	Cetartiodactyla	R_283	2006	Producers	MC	Weak	High	Indirect impact through interaction with other species	Indirect	North and Central America	Yes	Negative
Odocoileus_virginianus	Cervidae	Cetartiodactyla	R_283	2006	Producers	MC	Weak	High	Indirect impact through interaction with other species	Indirect	North and Central America	Yes	Negative
Odocoileus_virginianus	Cervidae	Cetartiodactyla	R_283	2006	Producers	MC	Weak	High	Indirect impact through interaction with other species	Indirect	North and Central America	Yes	Negative
Odocoileus_virginianus	Cervidae	Cetartiodactyla	R_283	2006	Producers	MC	Weak	High	Indirect impact through interaction with other species	Indirect	North and Central America	Yes	Negative
Odocoileus_virginianus	Cervidae	Cetartiodactyla	R_283	2006	Producers	MC	Weak	High	Indirect impact through interaction with other species	Indirect	North and Central America	Yes	Negative
Odocoileus_virginianus	Cervidae	Cetartiodactyla	R_283	2006	Producers	MC	Weak	High	Indirect impact through interaction with other species	Indirect	North and Central America	Yes	Negative
Odocoileus_virginianus	Cervidae	Cetartiodactyla	R_283	2006	Producers	MC	Weak	High	Indirect impact through interaction with other species	Indirect	North and Central America	Yes	Negative
Odocoileus_virginianus	Cervidae	Cetartiodactyla	R_283	2006	Producers	MC	Weak	High	Indirect impact through interaction with other species	Indirect	North and Central America	Yes	Negative
Odocoileus_virginianus	Cervidae	Cetartiodactyla	R_283	2006	Producers	MC	Weak	High	Indirect impact through interaction with other species	Indirect	North and Central America	Yes	Negative
Odocoileus_virginianus	Cervidae	Cetartiodactyla	R_283	2006	Producers	MO	Strong	Medium	(10) Indirect impacts through interactions with other taxa	Indirect	North_and_Central_America	Yes	Positive
Odocoileus_virginianus	Cervidae	Cetartiodactyla	R_283	2006	Producers	MO	Strong	Medium	(10) Indirect impacts through interactions with other taxa	Indirect	North_and_Central_America	Yes	Positive
Odocoileus_virginianus	Cervidae	Cetartiodactyla	R_283	2006	Producers	MO	Strong	Medium	(10) Indirect impacts through interactions with other taxa	Indirect	North_and_Central_America	Yes	Positive
Odocoileus_virginianus	Cervidae	Cetartiodactyla	R_283	2006	Producers	MC	Weak	High	(10) Indirect impacts through interactions with other taxa	Indirect	North_and_Central_America	Yes	Positive
Odocoileus_virginianus	Cervidae	Cetartiodactyla	R_283	2006	Producers	MC	Weak	High	(10) Indirect impacts through interactions with other taxa	Indirect	North_and_Central_America	Yes	Positive
Odocoileus_virginianus	Cervidae	Cetartiodactyla	R_283	2006	Producers	MC	Weak	High	(10) Indirect impacts through interactions with other taxa	Indirect	North_and_Central_America	Yes	Positive
Odocoileus_virginianus	Cervidae	Cetartiodactyla	R_283	2006	Producers	MC	Weak	High	(10) Indirect impacts through interactions with other taxa	Indirect	North_and_Central_America	Yes	Positive
Odocoileus_virginianus	Cervidae	Cetartiodactyla	R_283	2006	Producers	MC	Weak	High	(10) Indirect impacts through interactions with other taxa	Indirect	North_and_Central_America	Yes	Positive
Odocoileus_virginianus	Cervidae	Cetartiodactyla	R_283	2006	Producers	MO	Strong	Medium	(10) Indirect impacts through interactions with other taxa	Indirect	North_and_Central_America	Yes	Positive
Odocoileus_virginianus	Cervidae	Cetartiodactyla	R_283	2006	Producers	MC	Weak	High	(10) Indirect impacts through interactions with other taxa	Indirect	North_and_Central_America	Yes	Positive
Odocoileus_virginianus	Cervidae	Cetartiodactyla	R_283	2006	Producers	MO	Strong	Medium	(10) Indirect impacts through interactions with other taxa	Indirect	North_and_Central_America	Yes	Positive
Odocoileus_virginianus	Cervidae	Cetartiodactyla	R_283	2006	Producers	MC	Weak	High	(10) Indirect impacts through interactions with other taxa	Indirect	North_and_Central_America	Yes	Positive
Odocoileus_virginianus	Cervidae	Cetartiodactyla	R_283	2006	Producers	MC	Weak	High	(10) Indirect impacts through interactions with other taxa	Indirect	North_and_Central_America	Yes	Positive
Odocoileus_virginianus	Cervidae	Cetartiodactyla	R_283	2006	Producers	MC	Weak	High	(10) Indirect impacts through interactions with other taxa	Indirect	North_and_Central_America	Yes	Positive
Odocoileus_virginianus	Cervidae	Cetartiodactyla	R_283	2006	Producers	MO	Strong	Medium	(10) Indirect impacts through interactions with other taxa	Indirect	North_and_Central_America	Yes	Positive
Odocoileus_virginianus	Cervidae	Cetartiodactyla	R_283	2006	Producers	MO	Strong	Medium	(10) Indirect impacts through interactions with other taxa	Indirect	North_and_Central_America	Yes	Positive
Odocoileus_virginianus	Cervidae	Cetartiodactyla	R_283	2006	Producers	MC	Weak	High	(10) Indirect impacts through interactions with other taxa	Indirect	North_and_Central_America	Yes	Positive
Odocoileus_virginianus	Cervidae	Cetartiodactyla	R_283	2006	Producers	MC	Weak	High	(10) Indirect impacts through interactions with other taxa	Indirect	North_and_Central_America	Yes	Positive
Odocoileus_virginianus	Cervidae	Cetartiodactyla	R_283	2006	Producers	MC	Weak	High	(10) Indirect impacts through interactions with other taxa	Indirect	North_and_Central_America	Yes	Positive
Odocoileus_virginianus	Cervidae	Cetartiodactyla	R_283	2006	Producers	MC	Weak	High	(10) Indirect impacts through interactions with other taxa	Indirect	North_and_Central_America	Yes	Positive
Odocoileus_virginianus	Cervidae	Cetartiodactyla	R_283	2006	Producers	MO	Strong	Medium	(10) Indirect impacts through interactions with other taxa	Indirect	North_and_Central_America	Yes	Positive
Capra_hircus	Bovidae	Cetartiodactyla	R_284	1948	Producers	MN	Weak	Low	Grazing/herbivory/browsing	Direct	Oceania	Yes	Negative
Capra_hircus	Bovidae	Cetartiodactyla	R_284	1948	Producers	MN	Weak	Low	Grazing/herbivory/browsing	Direct	Oceania	Yes	Negative
Capra_hircus	Bovidae	Cetartiodactyla	R_284	1948	Producers	MN	Weak	Low	Grazing/herbivory/browsing	Direct	Oceania	Yes	Negative
Capra_hircus	Bovidae	Cetartiodactyla	R_284	1948	Producers	MN	Weak	Low	Grazing/herbivory/browsing	Direct	Oceania	Yes	Negative
Capra_hircus	Bovidae	Cetartiodactyla	R_284	1948	Producers	MN	Weak	Low	Grazing/herbivory/browsing	Direct	Oceania	Yes	Negative
Capra_hircus	Bovidae	Cetartiodactyla	R_284	1948	Producers	MN	Weak	Low	Grazing/herbivory/browsing	Direct	Oceania	Yes	Negative
Capra_hircus	Bovidae	Cetartiodactyla	R_284	1948	Producers	MN	Weak	Low	Direct physical disturbance	Direct	Oceania	Yes	Negative
Capra_hircus	Bovidae	Cetartiodactyla	R_284	1948	Secondary_consumers	MO	Strong	Low	Chemical, physical or structural impact on ecosystems	Indirect	Oceania	Yes	Negative
Capra_hircus	Bovidae	Cetartiodactyla	R_284	1948	Secondary_consumers	MO	Strong	Low	Chemical, physical or structural impact on ecosystems	Indirect	Oceania	Yes	Negative
Capra_hircus	Bovidae	Cetartiodactyla	R_284	1948	Secondary_consumers	MO	Strong	Low	Chemical, physical or structural impact on ecosystems	Indirect	Oceania	Yes	Negative
Capra_hircus	Bovidae	Cetartiodactyla	R_284	1948	Secondary_consumers	MO	Strong	Low	Chemical, physical or structural impact on ecosystems	Indirect	Oceania	Yes	Negative
Capra_hircus	Bovidae	Cetartiodactyla	R_284	1948	Secondary_consumers	MO	Strong	Low	Chemical, physical or structural impact on ecosystems	Indirect	Oceania	Yes	Negative
Equus_caballus	Equidae	Perissodactyla	R_285	1987	Primary_consumers	MN	Weak	Low	Chemical, physical or structural impact on ecosystems	Indirect	North and Central America	Yes	Negative
Equus_caballus	Equidae	Perissodactyla	R_285	1987	Producers	MN	Weak	Low	Grazing/herbivory/browsing	Direct	North and Central America	Yes	Negative
Axis_axis	Cervidae	Cetartiodactyla	R_286	1995	Producers	MO	Strong	Low	Direct physical disturbance; Grazing/herbivory/browsing; Indirect impact through interaction with other species	Direct	North and Central America	Yes	Negative
Axis_axis	Cervidae	Cetartiodactyla	R_286	1995	Producers	MO	Strong	Low	Direct physical disturbance; Grazing/herbivory/browsing; Indirect impact through interaction with other species	Direct	North and Central America	Yes	Negative
Axis_axis	Cervidae	Cetartiodactyla	R_286	1995	Producers	MO	Strong	Low	Direct physical disturbance; Grazing/herbivory/browsing; Indirect impact through interaction with other species	Direct	North and Central America	Yes	Negative
Axis_axis	Cervidae	Cetartiodactyla	R_286	1995	Producers	MO	Strong	Low	Direct physical disturbance; Grazing/herbivory/browsing; Indirect impact through interaction with other species	Direct	North and Central America	Yes	Negative
Axis_axis	Cervidae	Cetartiodactyla	R_286	1995	Producers	MO	Strong	Low	Direct physical disturbance; Grazing/herbivory/browsing; Indirect impact through interaction with other species	Direct	North and Central America	Yes	Negative
Axis_axis	Cervidae	Cetartiodactyla	R_286	1995	Producers	MO	Strong	Low	Direct physical disturbance; Grazing/herbivory/browsing; Indirect impact through interaction with other species	Direct	North and Central America	Yes	Negative
Ovis_orientalis	Bovidae	Cetartiodactyla	R_286	1995	Producers	MO	Strong	Low	Direct physical disturbance; Grazing/herbivory/browsing; Indirect impact through interaction with other species	Direct	North and Central America	Yes	Negative
Ovis_orientalis	Bovidae	Cetartiodactyla	R_286	1995	Producers	MO	Strong	Low	Direct physical disturbance; Grazing/herbivory/browsing; Indirect impact through interaction with other species	Direct	North and Central America	Yes	Negative
Cervus_nippon	Cervidae	Cetartiodactyla	R_287	2010	Producers	MO	Strong	Medium	Grazing/herbivory/browsing; Direct physical disturbance	Direct	Europe	Yes	Negative
Cervus_nippon	Cervidae	Cetartiodactyla	R_287	2010	Producers	MO	Strong	Medium	Grazing/herbivory/browsing; Direct physical disturbance	Direct	Europe	Yes	Negative
Cervus_nippon	Cervidae	Cetartiodactyla	R_287	2010	Secondary_consumers	MO	Strong	Low	Chemical, physical or structural impact on ecosystems	Indirect	Europe	Yes	Negative
Cervus_nippon	Cervidae	Cetartiodactyla	R_287	2010	Secondary_consumers	MO	Strong	Low	Chemical, physical or structural impact on ecosystems	Indirect	Europe	Yes	Negative
Cervus_nippon	Cervidae	Cetartiodactyla	R_287	2010	Producers	MO	Strong	Medium	(10) Indirect impacts through interactions with other taxa	Indirect	Europe	Yes	Positive
Cervus_nippon	Cervidae	Cetartiodactyla	R_287	2010	Secondary_consumers	MN	Weak	Low	(10) Indirect impacts through interactions with other taxa	Indirect	Europe	Yes	Positive
Cervus_nippon	Cervidae	Cetartiodactyla	R_287	2010	Secondary_consumers	MN	Weak	Low	(10) Indirect impacts through interactions with other taxa	Indirect	Europe	Yes	Positive
Ovis_aries	Bovidae	Cetartiodactyla	R_288	2013	Secondary_consumers	MO	Strong	Medium	Chemical, physical or structural impact on ecosystems	Indirect	North and Central America	Yes	Negative
Ovis_aries	Bovidae	Cetartiodactyla	R_288	2013	Secondary_consumers	MO	Strong	Medium	Chemical, physical or structural impact on ecosystems	Indirect	North and Central America	Yes	Negative
Ovis_aries	Bovidae	Cetartiodactyla	R_288	2013	Secondary_consumers	MO	Strong	Medium	Chemical, physical or structural impact on ecosystems	Indirect	North and Central America	Yes	Negative
Ovis_aries	Bovidae	Cetartiodactyla	R_288	2013	Secondary_consumers	MO	Strong	Medium	Chemical, physical or structural impact on ecosystems	Indirect	North and Central America	Yes	Negative
Ovis_aries	Bovidae	Cetartiodactyla	R_288	2013	Secondary_consumers	MO	Strong	Medium	Chemical, physical or structural impact on ecosystems	Indirect	North and Central America	Yes	Negative
Ovis_aries	Bovidae	Cetartiodactyla	R_288	2013	Secondary_consumers	MO	Strong	Medium	Chemical, physical or structural impact on ecosystems	Indirect	North and Central America	Yes	Negative
Ovis_aries	Bovidae	Cetartiodactyla	R_288	2013	Producers	MO	Strong	Low	Grazing/herbivory/browsing	Direct	North and Central America	Yes	Negative
Ovis_aries	Bovidae	Cetartiodactyla	R_288	2013	Producers	MO	Strong	Low	Grazing/herbivory/browsing	Direct	North and Central America	Yes	Negative
Ovis_aries	Bovidae	Cetartiodactyla	R_288	2013	Secondary_consumers	MO	Strong	Medium	Chemical, physical or structural impact on ecosystems	Indirect	North and Central America	Yes	Negative
Ovis_aries	Bovidae	Cetartiodactyla	R_288	2013	Secondary_consumers	MO	Strong	Medium	Chemical, physical or structural impact on ecosystems	Indirect	North and Central America	Yes	Negative
Ovis_aries	Bovidae	Cetartiodactyla	R_288	2013	Secondary_consumers	MO	Strong	Medium	(10) Indirect impacts through interactions with other taxa	Indirect	North_and_Central_America	Yes	Positive
Ovis_aries	Bovidae	Cetartiodactyla	R_288	2013	Secondary_consumers	MR	Strong	Low	(10) Indirect impacts through interactions with other taxa	Indirect	North_and_Central_America	Yes	Positive
Ovis_aries	Bovidae	Cetartiodactyla	R_289	2015	Producers	MO	Strong	Medium	Grazing/herbivory/browsing	Direct	North and Central America	Yes	Negative
Ovis_aries	Bovidae	Cetartiodactyla	R_289	2015	Producers	MO	Strong	Medium	Grazing/herbivory/browsing	Direct	North and Central America	Yes	Negative
Ovis_aries	Bovidae	Cetartiodactyla	R_289	2015	Producers	MO	Strong	Medium	Grazing/herbivory/browsing	Direct	North and Central America	Yes	Negative
Ovis_aries	Bovidae	Cetartiodactyla	R_289	2015	Producers	MO	Strong	Medium	Grazing/herbivory/browsing	Direct	North and Central America	Yes	Negative
Ovis_aries	Bovidae	Cetartiodactyla	R_289	2015	Producers	MO	Strong	Medium	Grazing/herbivory/browsing	Direct	North and Central America	Yes	Negative
Ovis_aries	Bovidae	Cetartiodactyla	R_289	2015	Producers	MO	Strong	Medium	Grazing/herbivory/browsing	Direct	North and Central America	Yes	Negative
Ovis_aries	Bovidae	Cetartiodactyla	R_289	2015	Producers	MO	Strong	Medium	Grazing/herbivory/browsing	Direct	North and Central America	Yes	Negative
Ovis_aries	Bovidae	Cetartiodactyla	R_289	2015	Producers	MO	Strong	Medium	Grazing/herbivory/browsing	Direct	North and Central America	Yes	Negative
Rusa_unicolor	Cervidae	Cetartiodactyla	R_29	2009	Producers	MO	Strong	Low	Grazing/herbivory/browsing	Direct	Oceania	No	Negative
Rusa_unicolor	Cervidae	Cetartiodactyla	R_29	2009	Producers	MO	Strong	Low	Grazing/herbivory/browsing	Direct	Oceania	No	Negative
Rusa_unicolor	Cervidae	Cetartiodactyla	R_29	2009	Producers	MN	Weak	Low	Grazing/herbivory/browsing	Direct	Oceania	No	Negative
Rusa_unicolor	Cervidae	Cetartiodactyla	R_29	2009	Producers	MN	Weak	Low	Grazing/herbivory/browsing	Direct	Oceania	No	Negative
Rusa_unicolor	Cervidae	Cetartiodactyla	R_29	2009	Producers	MN	Weak	Low	Grazing/herbivory/browsing	Direct	Oceania	No	Negative
Rusa_unicolor	Cervidae	Cetartiodactyla	R_29	2009	Producers	MN	Weak	Low	Grazing/herbivory/browsing	Direct	Oceania	No	Negative
Ovis_aries	Bovidae	Cetartiodactyla	R_290	1987	Secondary_consumers	MO	Strong	Low	Chemical, physical or structural impact on ecosystems	Indirect	North and Central America	Yes	Negative
Ovis_aries	Bovidae	Cetartiodactyla	R_290	1987	Secondary_consumers	MO	Strong	Low	Chemical, physical or structural impact on ecosystems	Indirect	North and Central America	Yes	Negative
Ovis_aries	Bovidae	Cetartiodactyla	R_290	1987	Secondary_consumers	MO	Strong	Low	Chemical, physical or structural impact on ecosystems	Indirect	North and Central America	Yes	Negative
Ovis_aries	Bovidae	Cetartiodactyla	R_290	1987	Secondary_consumers	MO	Strong	Low	Chemical, physical or structural impact on ecosystems	Indirect	North and Central America	Yes	Negative
Ovis_aries	Bovidae	Cetartiodactyla	R_290	1987	Secondary_consumers	MO	Strong	Low	Chemical, physical or structural impact on ecosystems	Indirect	North and Central America	Yes	Negative
Ovis_aries	Bovidae	Cetartiodactyla	R_290	1987	Secondary_consumers	MO	Strong	Low	Chemical, physical or structural impact on ecosystems	Indirect	North and Central America	Yes	Negative
Ovis_aries	Bovidae	Cetartiodactyla	R_290	1987	Producers	MO	Strong	Low	Grazing/herbivory/browsing	Direct	North and Central America	Yes	Negative
Ovis_aries	Bovidae	Cetartiodactyla	R_290	1987	Secondary_consumers	MO	Strong	Low	Chemical, physical or structural impact on ecosystems	Indirect	North and Central America	Yes	Negative
Ovis_aries	Bovidae	Cetartiodactyla	R_290	1987	Secondary_consumers	MO	Strong	Low	Chemical, physical or structural impact on ecosystems	Indirect	North and Central America	Yes	Negative
Odocoileus_virginianus	Cervidae	Cetartiodactyla	R_292	1980	Producers	MO	Strong	High	Grazing/herbivory/browsing	Direct	Oceania	Yes	Negative
Odocoileus_virginianus	Cervidae	Cetartiodactyla	R_292	1980	Producers	MO	Strong	High	Grazing/herbivory/browsing	Direct	Oceania	Yes	Negative
Odocoileus_virginianus	Cervidae	Cetartiodactyla	R_292	1980	Producers	MO	Strong	High	Grazing/herbivory/browsing	Direct	Oceania	Yes	Negative
Odocoileus_virginianus	Cervidae	Cetartiodactyla	R_292	1980	Producers	MO	Strong	High	Grazing/herbivory/browsing	Direct	Oceania	Yes	Negative
Odocoileus_virginianus	Cervidae	Cetartiodactyla	R_292	1980	Producers	MO	Strong	High	Grazing/herbivory/browsing	Direct	Oceania	Yes	Negative
Odocoileus_virginianus	Cervidae	Cetartiodactyla	R_292	1980	Producers	MO	Strong	High	Grazing/herbivory/browsing	Direct	Oceania	Yes	Negative
Odocoileus_virginianus	Cervidae	Cetartiodactyla	R_292	1980	Producers	MO	Strong	High	Grazing/herbivory/browsing	Direct	Oceania	Yes	Negative
Odocoileus_virginianus	Cervidae	Cetartiodactyla	R_292	1980	Producers	MO	Strong	High	Grazing/herbivory/browsing	Direct	Oceania	Yes	Negative
Odocoileus_virginianus	Cervidae	Cetartiodactyla	R_292	1980	Producers	MO	Strong	High	Grazing/herbivory/browsing	Direct	Oceania	Yes	Negative
Odocoileus_virginianus	Cervidae	Cetartiodactyla	R_292	1980	Producers	MO	Strong	High	Grazing/herbivory/browsing	Direct	Oceania	Yes	Negative
Odocoileus_virginianus	Cervidae	Cetartiodactyla	R_292	1980	Producers	MO	Strong	High	Grazing/herbivory/browsing	Direct	Oceania	Yes	Negative
Odocoileus_virginianus	Cervidae	Cetartiodactyla	R_292	1980	Producers	MO	Strong	High	Grazing/herbivory/browsing	Direct	Oceania	Yes	Negative
Odocoileus_virginianus	Cervidae	Cetartiodactyla	R_292	1980	Producers	MO	Strong	High	Grazing/herbivory/browsing	Direct	Oceania	Yes	Negative
Odocoileus_virginianus	Cervidae	Cetartiodactyla	R_292	1980	Producers	MO	Strong	High	Grazing/herbivory/browsing	Direct	Oceania	Yes	Negative
Odocoileus_virginianus	Cervidae	Cetartiodactyla	R_292	1980	Producers	MO	Strong	High	Grazing/herbivory/browsing	Direct	Oceania	Yes	Negative
Odocoileus_virginianus	Cervidae	Cetartiodactyla	R_292	1980	Producers	MO	Strong	High	Grazing/herbivory/browsing	Direct	Oceania	Yes	Negative
Odocoileus_virginianus	Cervidae	Cetartiodactyla	R_292	1980	Producers	MO	Strong	High	Grazing/herbivory/browsing	Direct	Oceania	Yes	Negative
Odocoileus_virginianus	Cervidae	Cetartiodactyla	R_292	1980	Producers	MO	Strong	High	Grazing/herbivory/browsing	Direct	Oceania	Yes	Negative
Odocoileus_virginianus	Cervidae	Cetartiodactyla	R_292	1980	Producers	MN	Weak	High	Grazing/herbivory/browsing	Direct	Oceania	Yes	Negative
Odocoileus_virginianus	Cervidae	Cetartiodactyla	R_292	1980	Producers	MN	Weak	High	Grazing/herbivory/browsing	Direct	Oceania	Yes	Negative
Odocoileus_virginianus	Cervidae	Cetartiodactyla	R_292	1980	Producers	MN	Weak	High	Grazing/herbivory/browsing	Direct	Oceania	Yes	Negative
Odocoileus_virginianus	Cervidae	Cetartiodactyla	R_292	1980	Producers	MN	Weak	High	Grazing/herbivory/browsing	Direct	Oceania	Yes	Negative
Odocoileus_virginianus	Cervidae	Cetartiodactyla	R_292	1980	Producers	MN	Weak	High	Grazing/herbivory/browsing	Direct	Oceania	Yes	Negative
Odocoileus_virginianus	Cervidae	Cetartiodactyla	R_292	1980	Producers	MN	Weak	High	Grazing/herbivory/browsing	Direct	Oceania	Yes	Negative
Axis_axis	Cervidae	Cetartiodactyla	R_293	1989	Producers	MO	Strong	Medium	Grazing/herbivory/browsing	Direct	South America	No	Negative
Axis_axis	Cervidae	Cetartiodactyla	R_293	1989	Producers	MN	Weak	Medium	Grazing/herbivory/browsing	Direct	South America	No	Negative
Axis_axis	Cervidae	Cetartiodactyla	R_293	1989	Producers	MN	Weak	Medium	Grazing/herbivory/browsing	Direct	South America	No	Negative
Axis_axis	Cervidae	Cetartiodactyla	R_293	1989	Producers	MN	Weak	Medium	Grazing/herbivory/browsing	Direct	South America	No	Negative
Axis_axis	Cervidae	Cetartiodactyla	R_293	1989	Producers	MO	Strong	High	(10) Indirect impacts through interactions with other taxa	Indirect	South_America	No	Positive
Axis_axis	Cervidae	Cetartiodactyla	R_293	1989	Producers	MO	Strong	High	(10) Indirect impacts through interactions with other taxa	Indirect	South_America	No	Positive
Axis_axis	Cervidae	Cetartiodactyla	R_293	1989	Producers	MR	Strong	Low	(2) Overcompensation	Direct	South_America	No	Positive
Axis_axis	Cervidae	Cetartiodactyla	R_293	1989	Producers	MO	Strong	High	(7) Chemical impact on ecosystem; (8) Physical impact on ecosystem; (9) Structural impact on ecosystem; (10) Indirect impact through interactions with other taxa; (6) Epibiosis or other direct provision of habitat	Indirect	South_America	No	Positive
Axis_axis	Cervidae	Cetartiodactyla	R_293	1989	Producers	MO	Strong	High	(7) Chemical impact on ecosystem; (8) Physical impact on ecosystem; (9) Structural impact on ecosystem; (10) Indirect impact through interactions with other taxa; (6) Epibiosis or other direct provision of habitat	Indirect	South_America	No	Positive
Axis_axis	Cervidae	Cetartiodactyla	R_293	1989	Producers	MO	Strong	High	(10) Indirect impacts through interactions with other taxa	Indirect	South_America	No	Positive
Cervus_elaphus	Cervidae	Cetartiodactyla	R_293	1989	Producers	MO	Strong	Medium	Grazing/herbivory/browsing	Direct	South America	No	Negative
Cervus_elaphus	Cervidae	Cetartiodactyla	R_293	1989	Producers	MN	Weak	Medium	Grazing/herbivory/browsing	Direct	South America	No	Negative
Cervus_elaphus	Cervidae	Cetartiodactyla	R_293	1989	Producers	MN	Weak	Medium	Grazing/herbivory/browsing	Direct	South America	No	Negative
Cervus_elaphus	Cervidae	Cetartiodactyla	R_293	1989	Producers	MN	Weak	Medium	Grazing/herbivory/browsing	Direct	South America	No	Negative
Cervus_elaphus	Cervidae	Cetartiodactyla	R_293	1989	Producers	MO	Strong	High	(10) Indirect impacts through interactions with other taxa	Indirect	South_America	No	Positive
Cervus_elaphus	Cervidae	Cetartiodactyla	R_293	1989	Producers	MO	Strong	High	(10) Indirect impacts through interactions with other taxa	Indirect	South_America	No	Positive
Cervus_elaphus	Cervidae	Cetartiodactyla	R_293	1989	Producers	MR	Strong	Low	(2) Overcompensation	Direct	South_America	No	Positive
Cervus_elaphus	Cervidae	Cetartiodactyla	R_293	1989	Producers	MO	Strong	High	(7) Chemical impact on ecosystem; (8) Physical impact on ecosystem; (9) Structural impact on ecosystem; (10) Indirect impact through interactions with other taxa; (6) Epibiosis or other direct provision of habitat	Indirect	South_America	No	Positive
Cervus_elaphus	Cervidae	Cetartiodactyla	R_293	1989	Producers	MO	Strong	High	(7) Chemical impact on ecosystem; (8) Physical impact on ecosystem; (9) Structural impact on ecosystem; (10) Indirect impact through interactions with other taxa; (6) Epibiosis or other direct provision of habitat	Indirect	South_America	No	Positive
Cervus_elaphus	Cervidae	Cetartiodactyla	R_293	1989	Producers	MO	Strong	High	(10) Indirect impacts through interactions with other taxa	Indirect	South_America	No	Positive
Dama_dama	Cervidae	Cetartiodactyla	R_293	1989	Producers	MO	Strong	Low	Grazing/herbivory/browsing	Direct	South America	No	Negative
Dama_dama	Cervidae	Cetartiodactyla	R_293	1989	Producers	MN	Weak	Medium	Grazing/herbivory/browsing	Direct	South America	No	Negative
Dama_dama	Cervidae	Cetartiodactyla	R_293	1989	Producers	MN	Weak	Medium	Grazing/herbivory/browsing	Direct	South America	No	Negative
Dama_dama	Cervidae	Cetartiodactyla	R_293	1989	Producers	MN	Weak	Medium	Grazing/herbivory/browsing	Direct	South America	No	Negative
Dama_dama	Cervidae	Cetartiodactyla	R_293	1989	Producers	MO	Strong	High	(10) Indirect impacts through interactions with other taxa	Indirect	South_America	Yes	Positive
Dama_dama	Cervidae	Cetartiodactyla	R_293	1989	Producers	MO	Strong	High	(10) Indirect impacts through interactions with other taxa	Indirect	South_America	Yes	Positive
Dama_dama	Cervidae	Cetartiodactyla	R_293	1989	Producers	MR	Strong	Low	(2) Overcompensation	Direct	South_America	Yes	Positive
Dama_dama	Cervidae	Cetartiodactyla	R_293	1989	Producers	MO	Strong	High	(7) Chemical impact on ecosystem; (8) Physical impact on ecosystem; (9) Structural impact on ecosystem; (10) Indirect impact through interactions with other taxa; (6) Epibiosis or other direct provision of habitat	Indirect	South_America	Yes	Positive
Dama_dama	Cervidae	Cetartiodactyla	R_293	1989	Producers	MO	Strong	High	(7) Chemical impact on ecosystem; (8) Physical impact on ecosystem; (9) Structural impact on ecosystem; (10) Indirect impact through interactions with other taxa; (6) Epibiosis or other direct provision of habitat	Indirect	South_America	Yes	Positive
Dama_dama	Cervidae	Cetartiodactyla	R_293	1989	Producers	MO	Strong	High	(10) Indirect impacts through interactions with other taxa	Indirect	South_America	Yes	Positive
Ammotragus_lervia	Bovidae	Cetartiodactyla	R_294	2017	Producers	MN	Weak	Medium	Grazing/herbivory/browsing	Direct	Europe	No	Negative
Ammotragus_lervia	Bovidae	Cetartiodactyla	R_294	2017	Producers	MN	Weak	Medium	Grazing/herbivory/browsing	Direct	Europe	No	Negative
Ammotragus_lervia	Bovidae	Cetartiodactyla	R_294	2017	Producers	MN	Weak	Medium	Grazing/herbivory/browsing	Direct	Europe	No	Negative
Ammotragus_lervia	Bovidae	Cetartiodactyla	R_294	2017	Producers	MN	Weak	Medium	Grazing/herbivory/browsing	Direct	Europe	No	Negative
Ammotragus_lervia	Bovidae	Cetartiodactyla	R_294	2017	Producers	MN	Weak	Medium	Grazing/herbivory/browsing	Direct	Europe	No	Negative
Ammotragus_lervia	Bovidae	Cetartiodactyla	R_294	2017	Producers	MN	Weak	Medium	Grazing/herbivory/browsing	Direct	Europe	No	Negative
Ammotragus_lervia	Bovidae	Cetartiodactyla	R_294	2017	Producers	MN	Weak	Medium	Grazing/herbivory/browsing	Direct	Europe	No	Negative
Ammotragus_lervia	Bovidae	Cetartiodactyla	R_294	2017	Producers	MN	Weak	Medium	Grazing/herbivory/browsing	Direct	Europe	No	Negative
Ammotragus_lervia	Bovidae	Cetartiodactyla	R_294	2017	Producers	MN	Weak	Medium	Grazing/herbivory/browsing	Direct	Europe	No	Negative
Ammotragus_lervia	Bovidae	Cetartiodactyla	R_294	2017	Producers	MN	Weak	Medium	Grazing/herbivory/browsing	Direct	Europe	No	Negative
Ammotragus_lervia	Bovidae	Cetartiodactyla	R_294	2017	Producers	MN	Weak	Medium	Grazing/herbivory/browsing	Direct	Europe	No	Negative
Ammotragus_lervia	Bovidae	Cetartiodactyla	R_294	2017	Producers	MN	Weak	Medium	Grazing/herbivory/browsing	Direct	Europe	No	Negative
Ammotragus_lervia	Bovidae	Cetartiodactyla	R_294	2017	Producers	MN	Weak	Medium	Grazing/herbivory/browsing	Direct	Europe	No	Negative
Ammotragus_lervia	Bovidae	Cetartiodactyla	R_294	2017	Producers	MN	Weak	Medium	Grazing/herbivory/browsing	Direct	Europe	No	Negative
Odocoileus_virginianus	Cervidae	Cetartiodactyla	R_295	2003	Producers	MR	Strong	Medium	Grazing/herbivory/browsing	Direct	North and Central America	Yes	Negative
Odocoileus_virginianus	Cervidae	Cetartiodactyla	R_295	2003	Producers	MR	Strong	Medium	Grazing/herbivory/browsing	Direct	North and Central America	Yes	Negative
Odocoileus_virginianus	Cervidae	Cetartiodactyla	R_295	2003	Producers	MR	Strong	Medium	Grazing/herbivory/browsing	Direct	North and Central America	Yes	Negative
Odocoileus_virginianus	Cervidae	Cetartiodactyla	R_295	2003	Producers	MR	Strong	Medium	Grazing/herbivory/browsing	Direct	North and Central America	Yes	Negative
Odocoileus_virginianus	Cervidae	Cetartiodactyla	R_295	2003	Producers	MR	Strong	Medium	Grazing/herbivory/browsing	Direct	North and Central America	Yes	Negative
Odocoileus_virginianus	Cervidae	Cetartiodactyla	R_295	2003	Producers	MR	Strong	Low	Grazing/herbivory/browsing	Direct	North and Central America	Yes	Negative
Odocoileus_virginianus	Cervidae	Cetartiodactyla	R_295	2003	Producers	MR	Strong	Low	Grazing/herbivory/browsing	Direct	North and Central America	Yes	Negative
Odocoileus_virginianus	Cervidae	Cetartiodactyla	R_295	2003	Producers	MO	Strong	Medium	Grazing/herbivory/browsing	Direct	North and Central America	Yes	Negative
Odocoileus_virginianus	Cervidae	Cetartiodactyla	R_295	2003	Producers	MO	Strong	Medium	Grazing/herbivory/browsing	Direct	North and Central America	Yes	Negative
Odocoileus_virginianus	Cervidae	Cetartiodactyla	R_295	2003	Producers	MO	Strong	Medium	Grazing/herbivory/browsing	Direct	North and Central America	Yes	Negative
Odocoileus_virginianus	Cervidae	Cetartiodactyla	R_295	2003	Producers	MO	Strong	Medium	Grazing/herbivory/browsing	Direct	North and Central America	Yes	Negative
Odocoileus_virginianus	Cervidae	Cetartiodactyla	R_295	2003	Producers	MO	Strong	Medium	Grazing/herbivory/browsing	Direct	North and Central America	Yes	Negative
Odocoileus_virginianus	Cervidae	Cetartiodactyla	R_295	2003	Producers	MN	Weak	Medium	Grazing/herbivory/browsing	Direct	North and Central America	Yes	Negative
Odocoileus_virginianus	Cervidae	Cetartiodactyla	R_295	2003	Producers	MN	Weak	Medium	Grazing/herbivory/browsing	Direct	North and Central America	Yes	Negative
Odocoileus_virginianus	Cervidae	Cetartiodactyla	R_295	2003	Producers	MN	Weak	Medium	Grazing/herbivory/browsing	Direct	North and Central America	Yes	Negative
Odocoileus_hemionus	Cervidae	Cetartiodactyla	R_296	2004	Producers	MN	Weak	Medium	Grazing/herbivory/browsing	Direct	North and Central America	Yes	Negative
Odocoileus_hemionus	Cervidae	Cetartiodactyla	R_297	2003	Producers	MN	Weak	High	Grazing/herbivory/browsing	Direct	North and Central America	Yes	Negative
Odocoileus_hemionus	Cervidae	Cetartiodactyla	R_298	2001	Producers	MN	Weak	Medium	Grazing/herbivory/browsing	Direct	North and Central America	Yes	Negative
Odocoileus_hemionus	Cervidae	Cetartiodactyla	R_298	2001	Producers	MN	Weak	Medium	Grazing/herbivory/browsing	Direct	North and Central America	Yes	Negative
Rangifer_tarandus	Cervidae	Cetartiodactyla	R_299	1984	Producers	MO	Strong	Medium	Grazing/herbivory/browsing	Direct	South America	Yes	Negative
Rangifer_tarandus	Cervidae	Cetartiodactyla	R_299	1984	Producers	MO	Strong	Medium	Grazing/herbivory/browsing	Direct	South America	Yes	Negative
Rangifer_tarandus	Cervidae	Cetartiodactyla	R_299	1984	Producers	MN	Weak	Medium	(10) Indirect impacts through interactions with other taxa	Indirect	South_America	Yes	Positive
Rangifer_tarandus	Cervidae	Cetartiodactyla	R_299	1984	Producers	MC	Weak	Low	(10) Indirect impacts through interactions with other taxa	Indirect	South_America	Yes	Positive
Cervus_elaphus	Cervidae	Cetartiodactyla	R_3	1984	Producers	MO	Strong	Medium	Grazing/herbivory/browsing	Direct	Oceania	Yes	Negative
Cervus_elaphus	Cervidae	Cetartiodactyla	R_3	1984	Producers	MO	Strong	Medium	Grazing/herbivory/browsing	Direct	Oceania	Yes	Negative
Cervus_elaphus	Cervidae	Cetartiodactyla	R_3	1984	Producers	MO	Strong	Medium	Grazing/herbivory/browsing	Direct	Oceania	Yes	Negative
Cervus_elaphus	Cervidae	Cetartiodactyla	R_3	1984	Producers	MO	Strong	Medium	Grazing/herbivory/browsing	Direct	Oceania	Yes	Negative
Cervus_elaphus	Cervidae	Cetartiodactyla	R_3	1984	Producers	MO	Strong	Medium	Grazing/herbivory/browsing	Direct	Oceania	Yes	Negative
Cervus_elaphus	Cervidae	Cetartiodactyla	R_3	1984	Producers	MO	Strong	Medium	Grazing/herbivory/browsing	Direct	Oceania	Yes	Negative
Cervus_elaphus	Cervidae	Cetartiodactyla	R_3	1984	Producers	MO	Strong	Medium	Grazing/herbivory/browsing	Direct	Oceania	Yes	Negative
Cervus_elaphus	Cervidae	Cetartiodactyla	R_3	1984	Producers	MO	Strong	Medium	Grazing/herbivory/browsing	Direct	Oceania	Yes	Negative
Cervus_elaphus	Cervidae	Cetartiodactyla	R_3	1984	Producers	MO	Strong	Medium	Grazing/herbivory/browsing	Direct	Oceania	Yes	Negative
Cervus_elaphus	Cervidae	Cetartiodactyla	R_3	1984	Producers	MN	Weak	Medium	Grazing/herbivory/browsing	Direct	Oceania	Yes	Negative
Cervus_elaphus	Cervidae	Cetartiodactyla	R_3	1984	Producers	MN	Weak	Medium	Grazing/herbivory/browsing	Direct	Oceania	Yes	Negative
Cervus_elaphus	Cervidae	Cetartiodactyla	R_3	1984	Producers	MN	Weak	Medium	Grazing/herbivory/browsing	Direct	Oceania	Yes	Negative
Cervus_elaphus	Cervidae	Cetartiodactyla	R_3	1984	Producers	MN	Weak	Medium	Grazing/herbivory/browsing	Direct	Oceania	Yes	Negative
Cervus_elaphus	Cervidae	Cetartiodactyla	R_3	1984	Producers	MN	Weak	Medium	Grazing/herbivory/browsing	Direct	Oceania	Yes	Negative
Cervus_elaphus	Cervidae	Cetartiodactyla	R_3	1984	Producers	MN	Weak	Medium	Grazing/herbivory/browsing	Direct	Oceania	Yes	Negative
Cervus_elaphus	Cervidae	Cetartiodactyla	R_3	1984	Producers	MN	Weak	Medium	Grazing/herbivory/browsing	Direct	Oceania	Yes	Negative
Cervus_elaphus	Cervidae	Cetartiodactyla	R_3	1984	Producers	MN	Weak	Medium	Grazing/herbivory/browsing	Direct	Oceania	Yes	Negative
Cervus_elaphus	Cervidae	Cetartiodactyla	R_3	1984	Producers	MN	Weak	Low	(10) Indirect impacts through interactions with other taxa	Indirect	Oceania	Yes	Positive
Cervus_elaphus	Cervidae	Cetartiodactyla	R_3	1984	Producers	MO	Strong	High	(10) Indirect impacts through interactions with other taxa	Indirect	Oceania	Yes	Positive
Cervus_elaphus	Cervidae	Cetartiodactyla	R_3	1984	Producers	MN	Weak	Low	(10) Indirect impacts through interactions with other taxa	Indirect	Oceania	Yes	Positive
Cervus_elaphus	Cervidae	Cetartiodactyla	R_3	1984	Producers	MN	Weak	Low	(10) Indirect impacts through interactions with other taxa	Indirect	Oceania	Yes	Positive
Cervus_elaphus	Cervidae	Cetartiodactyla	R_3	1984	Producers	MN	Weak	Low	(10) Indirect impacts through interactions with other taxa	Indirect	Oceania	Yes	Positive
Cervus_elaphus	Cervidae	Cetartiodactyla	R_3	1984	Producers	MN	Weak	Low	(10) Indirect impacts through interactions with other taxa	Indirect	Oceania	Yes	Positive
Cervus_elaphus	Cervidae	Cetartiodactyla	R_3	1984	Producers	MN	Weak	Low	(10) Indirect impacts through interactions with other taxa	Indirect	Oceania	Yes	Positive
Cervus_elaphus	Cervidae	Cetartiodactyla	R_3	1984	Producers	MN	Weak	Low	(10) Indirect impacts through interactions with other taxa	Indirect	Oceania	Yes	Positive
Cervus_elaphus	Cervidae	Cetartiodactyla	R_3	1984	Producers	MN	Weak	Low	(10) Indirect impacts through interactions with other taxa	Indirect	Oceania	Yes	Positive
Cervus_elaphus	Cervidae	Cetartiodactyla	R_3	1984	Producers	MN	Weak	Low	(10) Indirect impacts through interactions with other taxa	Indirect	Oceania	Yes	Positive
Cervus_elaphus	Cervidae	Cetartiodactyla	R_3	1984	Producers	MN	Weak	Low	(10) Indirect impacts through interactions with other taxa	Indirect	Oceania	Yes	Positive
Cervus_elaphus	Cervidae	Cetartiodactyla	R_3	1984	Producers	MN	Weak	Low	(10) Indirect impacts through interactions with other taxa	Indirect	Oceania	Yes	Positive
Cervus_elaphus	Cervidae	Cetartiodactyla	R_3	1984	Producers	MN	Weak	Low	(10) Indirect impacts through interactions with other taxa	Indirect	Oceania	Yes	Positive
Cervus_elaphus	Cervidae	Cetartiodactyla	R_3	1984	Producers	MO	Strong	Medium	(10) Indirect impacts through interactions with other taxa	Indirect	Oceania	Yes	Positive
Cervus_elaphus	Cervidae	Cetartiodactyla	R_3	1984	Producers	MN	Weak	Low	(10) Indirect impacts through interactions with other taxa	Indirect	Oceania	Yes	Positive
Cervus_elaphus	Cervidae	Cetartiodactyla	R_3	1984	Producers	MC	Weak	High	(10) Indirect impacts through interactions with other taxa	Indirect	Oceania	Yes	Positive
Cervus_elaphus	Cervidae	Cetartiodactyla	R_3	1984	Producers	MN	Weak	High	(10) Indirect impacts through interactions with other taxa	Indirect	Oceania	Yes	Positive
Cervus_elaphus	Cervidae	Cetartiodactyla	R_3	1984	Producers	MO	Strong	High	(10) Indirect impacts through interactions with other taxa	Indirect	Oceania	Yes	Positive
Cervus_elaphus	Cervidae	Cetartiodactyla	R_3	1984	Producers	MO	Strong	High	(10) Indirect impacts through interactions with other taxa	Indirect	Oceania	Yes	Positive
Cervus_elaphus	Cervidae	Cetartiodactyla	R_3	1984	Producers	MO	Strong	High	(10) Indirect impacts through interactions with other taxa	Indirect	Oceania	Yes	Positive
Cervus_elaphus	Cervidae	Cetartiodactyla	R_3	1984	Producers	MN	Weak	Low	(10) Indirect impacts through interactions with other taxa	Indirect	Oceania	Yes	Positive
Cervus_elaphus	Cervidae	Cetartiodactyla	R_3	1984	Producers	MN	Weak	Low	(10) Indirect impacts through interactions with other taxa	Indirect	Oceania	Yes	Positive
Rusa_unicolor	Cervidae	Cetartiodactyla	R_30	2010	Producers	MN	Weak	Medium	Direct physical disturbance	Direct	Oceania	No	Negative
Sus_scrofa	Suidae	Cetartiodactyla	R_300	1993	Decomposers	MO	Strong	Low	Chemical, physical or structural impact on ecosystems	Indirect	North and Central America	Yes	Negative
Sus_scrofa	Suidae	Cetartiodactyla	R_300	1993	Decomposers	MO	Strong	Low	Chemical, physical or structural impact on ecosystems	Indirect	North and Central America	Yes	Negative
Sus_scrofa	Suidae	Cetartiodactyla	R_300	1993	Decomposers	MO	Strong	Low	Chemical, physical or structural impact on ecosystems	Indirect	North and Central America	Yes	Negative
Sus_scrofa	Suidae	Cetartiodactyla	R_300	1993	Decomposers	MO	Strong	Low	Chemical, physical or structural impact on ecosystems	Indirect	North and Central America	Yes	Negative
Sus_scrofa	Suidae	Cetartiodactyla	R_300	1993	Decomposers	MO	Strong	Low	Chemical, physical or structural impact on ecosystems	Indirect	North and Central America	Yes	Negative
Sus_scrofa	Suidae	Cetartiodactyla	R_300	1993	Decomposers	MO	Strong	Low	Chemical, physical or structural impact on ecosystems	Indirect	North and Central America	Yes	Negative
Sus_scrofa	Suidae	Cetartiodactyla	R_300	1993	Decomposers	MO	Strong	Low	Chemical, physical or structural impact on ecosystems	Indirect	North and Central America	Yes	Negative
Sus_scrofa	Suidae	Cetartiodactyla	R_300	1993	Decomposers	MO	Strong	Low	Chemical, physical or structural impact on ecosystems	Indirect	North and Central America	Yes	Negative
Sus_scrofa	Suidae	Cetartiodactyla	R_300	1993	Decomposers	MO	Strong	Low	Chemical, physical or structural impact on ecosystems	Indirect	North and Central America	Yes	Negative
Sus_scrofa	Suidae	Cetartiodactyla	R_300	1993	Decomposers	MO	Strong	Low	Chemical, physical or structural impact on ecosystems	Indirect	North and Central America	Yes	Negative
Sus_scrofa	Suidae	Cetartiodactyla	R_300	1993	Decomposers	MO	Strong	Low	Chemical, physical or structural impact on ecosystems	Indirect	North and Central America	Yes	Negative
Sus_scrofa	Suidae	Cetartiodactyla	R_300	1993	Decomposers	MO	Strong	Low	Chemical, physical or structural impact on ecosystems	Indirect	North and Central America	Yes	Negative
Sus_scrofa	Suidae	Cetartiodactyla	R_300	1993	Decomposers	MO	Strong	Low	Chemical, physical or structural impact on ecosystems	Indirect	North and Central America	Yes	Negative
Sus_scrofa	Suidae	Cetartiodactyla	R_300	1993	Decomposers	MO	Strong	Low	Chemical, physical or structural impact on ecosystems	Indirect	North and Central America	Yes	Negative
Sus_scrofa	Suidae	Cetartiodactyla	R_300	1993	Decomposers	MO	Strong	Low	Chemical, physical or structural impact on ecosystems	Indirect	North and Central America	Yes	Negative
Sus_scrofa	Suidae	Cetartiodactyla	R_300	1993	Decomposers	MO	Strong	Low	Chemical, physical or structural impact on ecosystems	Indirect	North and Central America	Yes	Negative
Sus_scrofa	Suidae	Cetartiodactyla	R_300	1993	Decomposers	MO	Strong	Low	Chemical, physical or structural impact on ecosystems	Indirect	North and Central America	Yes	Negative
Sus_scrofa	Suidae	Cetartiodactyla	R_300	1993	Decomposers	MO	Strong	Low	Chemical, physical or structural impact on ecosystems	Indirect	North and Central America	Yes	Negative
Ovis_aries	Bovidae	Cetartiodactyla	R_301	2008	Primary_consumers	MO	Strong	Medium	Chemical, physical or structural impact on ecosystems	Indirect	North and Central America	Yes	Negative
Ovis_aries	Bovidae	Cetartiodactyla	R_301	2008	Secondary_consumers	MO	Strong	Medium	Chemical, physical or structural impact on ecosystems	Indirect	North and Central America	Yes	Negative
Ovis_aries	Bovidae	Cetartiodactyla	R_301	2008	Producers	MN	Weak	Medium	Grazing/herbivory/browsing	Direct	North and Central America	Yes	Negative
Ovis_aries	Bovidae	Cetartiodactyla	R_301	2008	Producers	MN	Weak	Medium	Grazing/herbivory/browsing	Direct	North and Central America	Yes	Negative
Ovis_aries	Bovidae	Cetartiodactyla	R_301	2008	Producers	MN	Weak	Medium	Grazing/herbivory/browsing	Direct	North and Central America	Yes	Negative
Ovis_aries	Bovidae	Cetartiodactyla	R_301	2008	Producers	MN	Weak	Medium	Grazing/herbivory/browsing	Direct	North and Central America	Yes	Negative
Ovis_aries	Bovidae	Cetartiodactyla	R_301	2008	Producers	MN	Weak	Medium	Grazing/herbivory/browsing	Direct	North and Central America	Yes	Negative
Dama_dama	Cervidae	Cetartiodactyla	R_302	2019	Secondary_consumers	MC	Weak	Medium	Indirect impact through interaction with other species	Indirect		No	Negative
Dama_dama	Cervidae	Cetartiodactyla	R_302	2019	Secondary_consumers	MC	Weak	Medium	Indirect impact through interaction with other species	Indirect		No	Negative
Dama_dama	Cervidae	Cetartiodactyla	R_302	2019	Decomposers	MO	Strong	Medium	Indirect impact through interaction with other species	Indirect		No	Negative
Dama_dama	Cervidae	Cetartiodactyla	R_302	2019	Secondary_consumers	MO	Strong	Low	Indirect impact through interaction with other species	Indirect		No	Negative
Dama_dama	Cervidae	Cetartiodactyla	R_302	2019	Producers	MO	Strong	Medium	Grazing/herbivory/browsing	Direct	Oceania	No	Negative
Dama_dama	Cervidae	Cetartiodactyla	R_302	2019	Producers	MO	Strong	Low	Grazing/herbivory/browsing	Direct	Oceania	No	Negative
Dama_dama	Cervidae	Cetartiodactyla	R_302	2019	Producers	MO	Strong	Low	Grazing/herbivory/browsing	Direct		No	Negative
Dama_dama	Cervidae	Cetartiodactyla	R_302	2019	Producers	MO	Strong	Low	Grazing/herbivory/browsing	Direct		No	Negative
Dama_dama	Cervidae	Cetartiodactyla	R_302	2019	Producers	MR	Strong	Medium	Grazing/herbivory/browsing	Direct		No	Negative
Dama_dama	Cervidae	Cetartiodactyla	R_302	2019	Producers	MO	Strong	Low	Grazing/herbivory/browsing	Direct		No	Negative
Dama_dama	Cervidae	Cetartiodactyla	R_302	2019	Producers	MO	Strong	Low	Grazing/herbivory/browsing	Direct		No	Negative
Dama_dama	Cervidae	Cetartiodactyla	R_302	2019	Producers	MN	Weak	Medium	Grazing/herbivory/browsing	Direct		No	Negative
Dama_dama	Cervidae	Cetartiodactyla	R_302	2019	Decomposers	MC	Weak	Medium	Indirect impact through interaction with other species	Indirect		No	Negative
Dama_dama	Cervidae	Cetartiodactyla	R_302	2019	Primary_consumers	MC	Weak	Medium	Indirect impact through interaction with other species	Indirect		No	Negative
Dama_dama	Cervidae	Cetartiodactyla	R_302	2019	Secondary_consumers	MC	Weak	Low	(10) Indirect impacts through interactions with other taxa	Indirect	Oceania	No	Positive
Dama_dama	Cervidae	Cetartiodactyla	R_302	2019	Producers	MN	Weak	Low	(10) Indirect impacts through interactions with other taxa	Indirect	Oceania	No	Positive
Dama_dama	Cervidae	Cetartiodactyla	R_302	2019	Producers	MO	Strong	Low	(10) Indirect impacts through interactions with other taxa	Indirect	Oceania	No	Positive
Dama_dama	Cervidae	Cetartiodactyla	R_302	2019	Producers	MC	Weak	Low	(10) Indirect impacts through interactions with other taxa	Indirect	Oceania	No	Positive
Dama_dama	Cervidae	Cetartiodactyla	R_302	2019	Producers	MC	Weak	Low	(10) Indirect impacts through interactions with other taxa	Indirect	Oceania	No	Positive
Dama_dama	Cervidae	Cetartiodactyla	R_302	2019	Primary_consumers	MN	Weak	Low	(10) Indirect impacts through interactions with other taxa	Indirect	Oceania	No	Positive
Dama_dama	Cervidae	Cetartiodactyla	R_302	2019	Decomposers	MC	Weak	Low	(10) Indirect impacts through interactions with other taxa	Indirect	Oceania	No	Positive
Dama_dama	Cervidae	Cetartiodactyla	R_302	2019	Primary_consumers	MC	Weak	Low	(10) Indirect impacts through interactions with other taxa	Indirect	Oceania	No	Positive
Dama_dama	Cervidae	Cetartiodactyla	R_302	2019	Primary_consumers	MC	Weak	Low	(10) Indirect impacts through interactions with other taxa	Indirect	Oceania	No	Positive
Dama_dama	Cervidae	Cetartiodactyla	R_302	2019	Primary_consumers	MC	Weak	Low	(10) Indirect impacts through interactions with other taxa	Indirect	Oceania	No	Positive
Dama_dama	Cervidae	Cetartiodactyla	R_302	2019	Primary_consumers	MC	Weak	Low	(10) Indirect impacts through interactions with other taxa	Indirect	Oceania	No	Positive
Dama_dama	Cervidae	Cetartiodactyla	R_302	2019	Secondary_consumers	MC	Weak	Low	(10) Indirect impacts through interactions with other taxa	Indirect	Oceania	No	Positive
Equus_caballus	Equidae	Perissodactyla	R_302	2019	Secondary_consumers	MC	Weak	Medium	Indirect impact through interaction with other species	Indirect		No	Negative
Equus_caballus	Equidae	Perissodactyla	R_302	2019	Secondary_consumers	MC	Weak	Medium	Indirect impact through interaction with other species	Indirect		No	Negative
Equus_caballus	Equidae	Perissodactyla	R_302	2019	Decomposers	MO	Strong	Medium	Indirect impact through interaction with other species	Indirect		No	Negative
Equus_caballus	Equidae	Perissodactyla	R_302	2019	Secondary_consumers	MO	Strong	Low	Indirect impact through interaction with other species	Indirect		No	Negative
Equus_caballus	Equidae	Perissodactyla	R_302	2019	Decomposers	MC	Weak	Medium	Indirect impact through interaction with other species	Indirect		No	Negative
Equus_caballus	Equidae	Perissodactyla	R_302	2019	Producers	MO	Strong	Medium	Grazing/herbivory/browsing	Direct	Oceania	No	Negative
Equus_caballus	Equidae	Perissodactyla	R_302	2019	Producers	MO	Strong	Low	Grazing/herbivory/browsing	Direct	Oceania	No	Negative
Equus_caballus	Equidae	Perissodactyla	R_302	2019	Producers	MO	Strong	Low	Grazing/herbivory/browsing	Direct		No	Negative
Equus_caballus	Equidae	Perissodactyla	R_302	2019	Producers	MO	Strong	Low	Grazing/herbivory/browsing	Direct		No	Negative
Equus_caballus	Equidae	Perissodactyla	R_302	2019	Producers	MR	Strong	Medium	Grazing/herbivory/browsing	Direct		No	Negative
Equus_caballus	Equidae	Perissodactyla	R_302	2019	Producers	MO	Strong	Low	Grazing/herbivory/browsing	Direct		No	Negative
Equus_caballus	Equidae	Perissodactyla	R_302	2019	Producers	MO	Strong	Low	Grazing/herbivory/browsing	Direct		No	Negative
Equus_caballus	Equidae	Perissodactyla	R_302	2019	Producers	MN	Weak	Medium	Grazing/herbivory/browsing	Direct		No	Negative
Equus_caballus	Equidae	Perissodactyla	R_302	2019	Primary_consumers	MC	Weak	Medium	Indirect impact through interaction with other species	Indirect		No	Negative
Equus_caballus	Equidae	Perissodactyla	R_302	2019	Secondary_consumers	MC	Weak	Low	(10) Indirect impacts through interactions with other taxa	Indirect	Oceania	No	Positive
Equus_caballus	Equidae	Perissodactyla	R_302	2019	Producers	MN	Weak	Low	(10) Indirect impacts through interactions with other taxa	Indirect	Oceania	No	Positive
Equus_caballus	Equidae	Perissodactyla	R_302	2019	Producers	MO	Strong	Low	(10) Indirect impacts through interactions with other taxa	Indirect	Oceania	No	Positive
Equus_caballus	Equidae	Perissodactyla	R_302	2019	Producers	MC	Weak	Low	(10) Indirect impacts through interactions with other taxa	Indirect	Oceania	No	Positive
Equus_caballus	Equidae	Perissodactyla	R_302	2019	Producers	MC	Weak	Low	(10) Indirect impacts through interactions with other taxa	Indirect	Oceania	No	Positive
Equus_caballus	Equidae	Perissodactyla	R_302	2019	Primary_consumers	MN	Weak	Low	(10) Indirect impacts through interactions with other taxa	Indirect	Oceania	No	Positive
Equus_caballus	Equidae	Perissodactyla	R_302	2019	Decomposers	MC	Weak	Low	(10) Indirect impacts through interactions with other taxa	Indirect	Oceania	No	Positive
Equus_caballus	Equidae	Perissodactyla	R_302	2019	Primary_consumers	MC	Weak	Low	(10) Indirect impacts through interactions with other taxa	Indirect	Oceania	No	Positive
Equus_caballus	Equidae	Perissodactyla	R_302	2019	Primary_consumers	MC	Weak	Low	(10) Indirect impacts through interactions with other taxa	Indirect	Oceania	No	Positive
Equus_caballus	Equidae	Perissodactyla	R_302	2019	Primary_consumers	MC	Weak	Low	(10) Indirect impacts through interactions with other taxa	Indirect	Oceania	No	Positive
Equus_caballus	Equidae	Perissodactyla	R_302	2019	Primary_consumers	MC	Weak	Low	(10) Indirect impacts through interactions with other taxa	Indirect	Oceania	No	Positive
Equus_caballus	Equidae	Perissodactyla	R_302	2019	Secondary_consumers	MC	Weak	Low	(10) Indirect impacts through interactions with other taxa	Indirect	Oceania	No	Positive
Rusa_unicolor	Cervidae	Cetartiodactyla	R_302	2019	Secondary_consumers	MC	Weak	Medium	Indirect impact through interaction with other species	Indirect		No	Negative
Rusa_unicolor	Cervidae	Cetartiodactyla	R_302	2019	Secondary_consumers	MC	Weak	Medium	Indirect impact through interaction with other species	Indirect		No	Negative
Rusa_unicolor	Cervidae	Cetartiodactyla	R_302	2019	Decomposers	MO	Strong	Medium	Indirect impact through interaction with other species	Indirect		No	Negative
Rusa_unicolor	Cervidae	Cetartiodactyla	R_302	2019	Secondary_consumers	MO	Strong	Low	Indirect impact through interaction with other species	Indirect		No	Negative
Rusa_unicolor	Cervidae	Cetartiodactyla	R_302	2019	Decomposers	MC	Weak	Medium	Indirect impact through interaction with other species	Indirect		No	Negative
Rusa_unicolor	Cervidae	Cetartiodactyla	R_302	2019	Primary_consumers	MC	Weak	Medium	Indirect impact through interaction with other species	Indirect		No	Negative
Rusa_unicolor	Cervidae	Cetartiodactyla	R_302	2019	Producers	MO	Strong	Medium	Grazing/herbivory/browsing	Direct	Oceania	No	Negative
Rusa_unicolor	Cervidae	Cetartiodactyla	R_302	2019	Producers	MO	Strong	Low	Grazing/herbivory/browsing	Direct	Oceania	No	Negative
Rusa_unicolor	Cervidae	Cetartiodactyla	R_302	2019	Producers	MO	Strong	Low	Grazing/herbivory/browsing	Direct		No	Negative
Rusa_unicolor	Cervidae	Cetartiodactyla	R_302	2019	Producers	MO	Strong	Low	Grazing/herbivory/browsing	Direct		No	Negative
Rusa_unicolor	Cervidae	Cetartiodactyla	R_302	2019	Producers	MR	Strong	Medium	Grazing/herbivory/browsing	Direct		No	Negative
Rusa_unicolor	Cervidae	Cetartiodactyla	R_302	2019	Producers	MO	Strong	Low	Grazing/herbivory/browsing	Direct		No	Negative
Rusa_unicolor	Cervidae	Cetartiodactyla	R_302	2019	Producers	MO	Strong	Low	Grazing/herbivory/browsing	Direct		No	Negative
Rusa_unicolor	Cervidae	Cetartiodactyla	R_302	2019	Producers	MN	Weak	Medium	Grazing/herbivory/browsing	Direct		No	Negative
Rusa_unicolor	Cervidae	Cetartiodactyla	R_302	2019	Secondary_consumers	MC	Weak	Low	(10) Indirect impacts through interactions with other taxa	Indirect	Oceania	No	Positive
Rusa_unicolor	Cervidae	Cetartiodactyla	R_302	2019	Producers	MN	Weak	Low	(10) Indirect impacts through interactions with other taxa	Indirect	Oceania	No	Positive
Rusa_unicolor	Cervidae	Cetartiodactyla	R_302	2019	Producers	MO	Strong	Low	(10) Indirect impacts through interactions with other taxa	Indirect	Oceania	No	Positive
Rusa_unicolor	Cervidae	Cetartiodactyla	R_302	2019	Producers	MC	Weak	Low	(10) Indirect impacts through interactions with other taxa	Indirect	Oceania	No	Positive
Rusa_unicolor	Cervidae	Cetartiodactyla	R_302	2019	Producers	MC	Weak	Low	(10) Indirect impacts through interactions with other taxa	Indirect	Oceania	No	Positive
Rusa_unicolor	Cervidae	Cetartiodactyla	R_302	2019	Primary_consumers	MN	Weak	Low	(10) Indirect impacts through interactions with other taxa	Indirect	Oceania	No	Positive
Rusa_unicolor	Cervidae	Cetartiodactyla	R_302	2019	Decomposers	MC	Weak	Low	(10) Indirect impacts through interactions with other taxa	Indirect	Oceania	No	Positive
Rusa_unicolor	Cervidae	Cetartiodactyla	R_302	2019	Primary_consumers	MC	Weak	Low	(10) Indirect impacts through interactions with other taxa	Indirect	Oceania	No	Positive
Rusa_unicolor	Cervidae	Cetartiodactyla	R_302	2019	Primary_consumers	MC	Weak	Low	(10) Indirect impacts through interactions with other taxa	Indirect	Oceania	No	Positive
Rusa_unicolor	Cervidae	Cetartiodactyla	R_302	2019	Primary_consumers	MC	Weak	Low	(10) Indirect impacts through interactions with other taxa	Indirect	Oceania	No	Positive
Rusa_unicolor	Cervidae	Cetartiodactyla	R_302	2019	Primary_consumers	MC	Weak	Low	(10) Indirect impacts through interactions with other taxa	Indirect	Oceania	No	Positive
Rusa_unicolor	Cervidae	Cetartiodactyla	R_302	2019	Secondary_consumers	MC	Weak	Low	(10) Indirect impacts through interactions with other taxa	Indirect	Oceania	No	Positive
Capra_hircus	Bovidae	Cetartiodactyla	R_303	2001	Producers	MN	Weak	Medium	Grazing/herbivory/browsing	Direct	Oceania	Yes	Negative
Capra_hircus	Bovidae	Cetartiodactyla	R_303	2001	Producers	MN	Weak	Medium	Grazing/herbivory/browsing	Direct	Oceania	Yes	Negative
Capra_hircus	Bovidae	Cetartiodactyla	R_303	2001	Producers	MN	Weak	Medium	Grazing/herbivory/browsing	Direct	Oceania	Yes	Negative
Capra_hircus	Bovidae	Cetartiodactyla	R_303	2001	Producers	MN	Weak	Medium	Grazing/herbivory/browsing	Direct	Oceania	Yes	Negative
Capra_hircus	Bovidae	Cetartiodactyla	R_303	2001	Secondary_consumers	MO	Strong	Medium	Chemical, physical or structural impact on ecosystems	Indirect	Oceania	Yes	Negative
Capra_hircus	Bovidae	Cetartiodactyla	R_303	2001	Secondary_consumers	MO	Strong	Medium	Chemical, physical or structural impact on ecosystems	Indirect	Oceania	Yes	Negative
Capra_hircus	Bovidae	Cetartiodactyla	R_303	2001	Producers	MO	Strong	High	(10) Indirect impacts through interactions with other taxa	Indirect	Oceania	Yes	Positive
Capra_hircus	Bovidae	Cetartiodactyla	R_303	2001	Producers	MO	Strong	High	(10) Indirect impacts through interactions with other taxa	Indirect	Oceania	Yes	Positive
Capra_hircus	Bovidae	Cetartiodactyla	R_303	2001	Producers	MO	Strong	High	(10) Indirect impacts through interactions with other taxa	Indirect	Oceania	Yes	Positive
Capra_hircus	Bovidae	Cetartiodactyla	R_303	2001	Producers	MO	Strong	High	(10) Indirect impacts through interactions with other taxa	Indirect	Oceania	Yes	Positive
Capra_hircus	Bovidae	Cetartiodactyla	R_303	2001	Producers	MO	Strong	High	(10) Indirect impacts through interactions with other taxa	Indirect	Oceania	Yes	Positive
Cervus_elaphus	Cervidae	Cetartiodactyla	R_303	2001	Producers	MN	Weak	Medium	Grazing/herbivory/browsing	Direct	Oceania	Yes	Negative
Cervus_elaphus	Cervidae	Cetartiodactyla	R_303	2001	Producers	MN	Weak	Medium	Grazing/herbivory/browsing	Direct	Oceania	Yes	Negative
Cervus_elaphus	Cervidae	Cetartiodactyla	R_303	2001	Producers	MN	Weak	Medium	Grazing/herbivory/browsing	Direct	Oceania	Yes	Negative
Cervus_elaphus	Cervidae	Cetartiodactyla	R_303	2001	Producers	MN	Weak	Medium	Grazing/herbivory/browsing	Direct	Oceania	Yes	Negative
Cervus_elaphus	Cervidae	Cetartiodactyla	R_303	2001	Secondary_consumers	MO	Strong	Medium	Chemical, physical or structural impact on ecosystems	Indirect	Oceania	Yes	Negative
Cervus_elaphus	Cervidae	Cetartiodactyla	R_303	2001	Secondary_consumers	MO	Strong	Medium	Chemical, physical or structural impact on ecosystems	Indirect	Oceania	Yes	Negative
Cervus_elaphus	Cervidae	Cetartiodactyla	R_303	2001	Producers	MO	Strong	High	(10) Indirect impacts through interactions with other taxa	Indirect	Oceania	Yes	Positive
Cervus_elaphus	Cervidae	Cetartiodactyla	R_303	2001	Producers	MO	Strong	High	(10) Indirect impacts through interactions with other taxa	Indirect	Oceania	Yes	Positive
Cervus_elaphus	Cervidae	Cetartiodactyla	R_303	2001	Producers	MO	Strong	High	(10) Indirect impacts through interactions with other taxa	Indirect	Oceania	Yes	Positive
Cervus_elaphus	Cervidae	Cetartiodactyla	R_303	2001	Producers	MO	Strong	High	(10) Indirect impacts through interactions with other taxa	Indirect	Oceania	Yes	Positive
Cervus_elaphus	Cervidae	Cetartiodactyla	R_303	2001	Producers	MO	Strong	High	(10) Indirect impacts through interactions with other taxa	Indirect	Oceania	Yes	Positive
Cervus_elaphus	Cervidae	Cetartiodactyla	R_303	2001	Producers	MO	Strong	High	(10) Indirect impacts through interactions with other taxa	Indirect	Oceania	Yes	Positive
Cervus_elaphus	Cervidae	Cetartiodactyla	R_303	2001	Producers	MO	Strong	High	(10) Indirect impacts through interactions with other taxa	Indirect	Oceania	Yes	Positive
Cervus_elaphus	Cervidae	Cetartiodactyla	R_303	2001	Producers	MO	Strong	High	(10) Indirect impacts through interactions with other taxa	Indirect	Oceania	Yes	Positive
Cervus_elaphus	Cervidae	Cetartiodactyla	R_303	2001	Producers	MO	Strong	High	(10) Indirect impacts through interactions with other taxa	Indirect	Oceania	Yes	Positive
Cervus_elaphus	Cervidae	Cetartiodactyla	R_303	2001	Producers	MO	Strong	High	(10) Indirect impacts through interactions with other taxa	Indirect	Oceania	Yes	Positive
Cervus_elaphus	Cervidae	Cetartiodactyla	R_303	2001	Producers	MO	Strong	High	(10) Indirect impacts through interactions with other taxa	Indirect	Oceania	Yes	Positive
Cervus_elaphus	Cervidae	Cetartiodactyla	R_303	2001	Producers	MO	Strong	High	(10) Indirect impacts through interactions with other taxa	Indirect	Oceania	Yes	Positive
Cervus_elaphus	Cervidae	Cetartiodactyla	R_303	2001	Producers	MO	Strong	High	(10) Indirect impacts through interactions with other taxa	Indirect	Oceania	Yes	Positive
Dama_dama	Cervidae	Cetartiodactyla	R_303	2001	Producers	MN	Weak	Medium	Grazing/herbivory/browsing	Direct	Oceania	Yes	Negative
Dama_dama	Cervidae	Cetartiodactyla	R_303	2001	Producers	MN	Weak	Medium	Grazing/herbivory/browsing	Direct	Oceania	Yes	Negative
Dama_dama	Cervidae	Cetartiodactyla	R_303	2001	Secondary_consumers	MO	Strong	Medium	Chemical, physical or structural impact on ecosystems	Indirect	Oceania	Yes	Negative
Dama_dama	Cervidae	Cetartiodactyla	R_303	2001	Secondary_consumers	MO	Strong	Medium	Chemical, physical or structural impact on ecosystems	Indirect	Oceania	Yes	Negative
Dama_dama	Cervidae	Cetartiodactyla	R_303	2001	Producers	MO	Strong	High	(10) Indirect impacts through interactions with other taxa	Indirect	Oceania	Yes	Positive
Odocoileus_virginianus	Cervidae	Cetartiodactyla	R_303	2001	Producers	MN	Weak	Medium	Grazing/herbivory/browsing	Direct	Oceania	Yes	Negative
Odocoileus_virginianus	Cervidae	Cetartiodactyla	R_303	2001	Producers	MN	Weak	Medium	Grazing/herbivory/browsing	Direct	Oceania	Yes	Negative
Odocoileus_virginianus	Cervidae	Cetartiodactyla	R_303	2001	Secondary_consumers	MO	Strong	Medium	Chemical, physical or structural impact on ecosystems	Indirect	Oceania	Yes	Negative
Odocoileus_virginianus	Cervidae	Cetartiodactyla	R_303	2001	Secondary_consumers	MO	Strong	Medium	Chemical, physical or structural impact on ecosystems	Indirect	Oceania	Yes	Negative
Odocoileus_virginianus	Cervidae	Cetartiodactyla	R_303	2001	Producers	MO	Strong	High	(10) Indirect impacts through interactions with other taxa	Indirect	Oceania	Yes	Positive
Cervus_canadensis	Cervidae	Cetartiodactyla	R_304	1971	Producers	MN	Weak	Low	Grazing/herbivory/browsing	Direct	Oceania	Yes	Negative
Cervus_canadensis	Cervidae	Cetartiodactyla	R_304	1971	Producers	MN	Weak	Low	Grazing/herbivory/browsing	Direct	Oceania	Yes	Negative
Cervus_canadensis	Cervidae	Cetartiodactyla	R_304	1971	Producers	MN	Weak	Low	Grazing/herbivory/browsing	Direct	Oceania	Yes	Negative
Cervus_canadensis	Cervidae	Cetartiodactyla	R_304	1971	Producers	MN	Weak	Low	Grazing/herbivory/browsing	Direct	Oceania	Yes	Negative
Cervus_canadensis	Cervidae	Cetartiodactyla	R_304	1971	Producers	MN	Weak	Low	Grazing/herbivory/browsing	Direct	Oceania	Yes	Negative
Cervus_canadensis	Cervidae	Cetartiodactyla	R_304	1971	Producers	MN	Weak	Low	Grazing/herbivory/browsing	Direct	Oceania	Yes	Negative
Cervus_elaphus	Cervidae	Cetartiodactyla	R_304	1971	Producers	MN	Weak	Low	Grazing/herbivory/browsing	Direct	Oceania	Yes	Negative
Cervus_elaphus	Cervidae	Cetartiodactyla	R_304	1971	Producers	MN	Weak	Low	Grazing/herbivory/browsing	Direct	Oceania	Yes	Negative
Cervus_elaphus	Cervidae	Cetartiodactyla	R_304	1971	Producers	MN	Weak	Low	Grazing/herbivory/browsing	Direct	Oceania	Yes	Negative
Cervus_elaphus	Cervidae	Cetartiodactyla	R_304	1971	Producers	MN	Weak	Low	Grazing/herbivory/browsing	Direct	Oceania	Yes	Negative
Cervus_elaphus	Cervidae	Cetartiodactyla	R_304	1971	Producers	MN	Weak	Low	Grazing/herbivory/browsing	Direct	Oceania	Yes	Negative
Cervus_elaphus	Cervidae	Cetartiodactyla	R_304	1971	Producers	MN	Weak	Low	Grazing/herbivory/browsing	Direct	Oceania	Yes	Negative
Sus_scrofa	Suidae	Cetartiodactyla	R_305	2010	Producers	MN	Weak	Low	Direct physical disturbance	Direct	Oceania	No	Negative
Bubalus_bubalis	Bovidae	Cetartiodactyla	R_306	2006	Producers	MN	Weak	Medium	(2) Overcompensation	Direct	Oceania	No	Positive
Sus_scrofa	Suidae	Cetartiodactyla	R_307	2013	Secondary_consumers	MN	Weak	Low	Predation	Direct	Oceania	No	Negative
Sus_scrofa	Suidae	Cetartiodactyla	R_307	2013	Secondary_consumers	MN	Weak	Low	Predation	Direct	Oceania	No	Negative
Sus_scrofa	Suidae	Cetartiodactyla	R_307	2013	Secondary_consumers	MN	Weak	Low	Predation	Direct	Oceania	No	Negative
Sus_scrofa	Suidae	Cetartiodactyla	R_308	2009	Secondary_consumers	MN	Weak	Low	Predation	Direct	North and Central America	No	Negative
Sus_scrofa	Suidae	Cetartiodactyla	R_308	2009	Secondary_consumers	MN	Weak	Low	Predation	Direct	North and Central America	No	Negative
Sus_scrofa	Suidae	Cetartiodactyla	R_308	2009	Secondary_consumers	MN	Weak	Low	Predation	Direct	North and Central America	No	Negative
Sus_scrofa	Suidae	Cetartiodactyla	R_308	2009	Secondary_consumers	MN	Weak	Low	Predation	Direct	North and Central America	No	Negative
Sus_scrofa	Suidae	Cetartiodactyla	R_308	2009	Secondary_consumers	MN	Weak	Low	Predation	Direct	North and Central America	No	Negative
Sus_scrofa	Suidae	Cetartiodactyla	R_308	2009	Primary_consumers	MN	Weak	Low	Predation	Direct	North and Central America	No	Negative
Sus_scrofa	Suidae	Cetartiodactyla	R_308	2009	Primary_consumers	MN	Weak	Low	Predation	Direct	North and Central America	No	Negative
Sus_scrofa	Suidae	Cetartiodactyla	R_308	2009	Primary_consumers	MN	Weak	Low	Predation	Direct	North and Central America	No	Negative
Sus_scrofa	Suidae	Cetartiodactyla	R_308	2009	Secondary_consumers	MN	Weak	Low	Predation	Direct	North and Central America	No	Negative
Sus_scrofa	Suidae	Cetartiodactyla	R_308	2009	Secondary_consumers	MN	Weak	Low	Predation	Direct	North and Central America	No	Negative
Sus_scrofa	Suidae	Cetartiodactyla	R_308	2009	Secondary_consumers	MN	Weak	Low	Predation	Direct	North and Central America	No	Negative
Sus_scrofa	Suidae	Cetartiodactyla	R_308	2009	Secondary_consumers	MN	Weak	Low	Predation	Direct	North and Central America	No	Negative
Sus_scrofa	Suidae	Cetartiodactyla	R_308	2009	Secondary_consumers	MN	Weak	Low	Predation	Direct	North and Central America	No	Negative
Sus_scrofa	Suidae	Cetartiodactyla	R_308	2009	Primary_consumers	MN	Weak	Low	Predation	Direct	North and Central America	No	Negative
Sus_scrofa	Suidae	Cetartiodactyla	R_308	2009	Secondary_consumers	MN	Weak	Low	Predation	Direct	North and Central America	No	Negative
Sus_scrofa	Suidae	Cetartiodactyla	R_308	2009	Secondary_consumers	MN	Weak	Low	Predation	Direct	North and Central America	No	Negative
Sus_scrofa	Suidae	Cetartiodactyla	R_308	2009	Primary_consumers	MN	Weak	Low	Predation	Direct	North and Central America	No	Negative
Sus_scrofa	Suidae	Cetartiodactyla	R_308	2009	Primary_consumers	MN	Weak	Low	Predation	Direct	North and Central America	No	Negative
Sus_scrofa	Suidae	Cetartiodactyla	R_308	2009	Primary_consumers	MN	Weak	Low	Predation	Direct	North and Central America	No	Negative
Sus_scrofa	Suidae	Cetartiodactyla	R_308	2009	Secondary_consumers	MN	Weak	Low	Predation	Direct	North and Central America	No	Negative
Cervus_elaphus	Cervidae	Cetartiodactyla	R_309	2006	Producers	MN	Weak	Low	Grazing/herbivory/browsing	Direct	Oceania	Yes	Negative
Cervus_elaphus	Cervidae	Cetartiodactyla	R_309	2006	Producers	MN	Weak	Low	Grazing/herbivory/browsing	Direct	Oceania	Yes	Negative
Cervus_elaphus	Cervidae	Cetartiodactyla	R_309	2006	Producers	MN	Weak	Low	Grazing/herbivory/browsing	Direct	Oceania	Yes	Negative
Cervus_elaphus	Cervidae	Cetartiodactyla	R_309	2006	Producers	MN	Weak	Low	Grazing/herbivory/browsing	Direct	Oceania	Yes	Negative
Cervus_elaphus	Cervidae	Cetartiodactyla	R_309	2006	Producers	MN	Weak	Low	Grazing/herbivory/browsing	Direct	Oceania	Yes	Negative
Cervus_elaphus	Cervidae	Cetartiodactyla	R_309	2006	Producers	MN	Weak	Low	Grazing/herbivory/browsing	Direct	Oceania	Yes	Negative
Cervus_elaphus	Cervidae	Cetartiodactyla	R_309	2006	Producers	MN	Weak	Low	Grazing/herbivory/browsing	Direct	Oceania	Yes	Negative
Cervus_elaphus	Cervidae	Cetartiodactyla	R_309	2006	Producers	MN	Weak	Low	Grazing/herbivory/browsing	Direct	Oceania	Yes	Negative
Cervus_elaphus	Cervidae	Cetartiodactyla	R_309	2006	Producers	MN	Weak	Low	Grazing/herbivory/browsing	Direct	Oceania	Yes	Negative
Cervus_elaphus	Cervidae	Cetartiodactyla	R_309	2006	Producers	MN	Weak	Low	Grazing/herbivory/browsing	Direct	Oceania	Yes	Negative
Bos_taurus	Bovidae	Cetartiodactyla	R_31	1991	Producers	MN	Weak	Low	Grazing/herbivory/browsing	Direct	Oceania	No	Negative
Bos_taurus	Bovidae	Cetartiodactyla	R_31	1991	Producers	MN	Weak	Low	Grazing/herbivory/browsing	Direct	Oceania	No	Negative
Bos_taurus	Bovidae	Cetartiodactyla	R_31	1991	Producers	MN	Weak	Low	Grazing/herbivory/browsing	Direct	Oceania	No	Negative
Equus_caballus	Equidae	Perissodactyla	R_31	1991	Producers	MO	Strong	Low	Grazing/herbivory/browsing	Direct	Oceania	No	Negative
Equus_caballus	Equidae	Perissodactyla	R_31	1991	Producers	MN	Weak	Low	Grazing/herbivory/browsing	Direct	Oceania	No	Negative
Equus_caballus	Equidae	Perissodactyla	R_31	1991	Producers	MN	Weak	Low	Grazing/herbivory/browsing	Direct	Oceania	No	Negative
Bos_taurus	Bovidae	Cetartiodactyla	R_310	1987	Producers	MN	Weak	Low	Grazing/herbivory/browsing	Direct	North and Central America	Yes	Negative
Bos_taurus	Bovidae	Cetartiodactyla	R_310	1987	Producers	MN	Weak	Low	Grazing/herbivory/browsing	Direct	North and Central America	Yes	Negative
Bos_taurus	Bovidae	Cetartiodactyla	R_310	1987	Producers	MN	Weak	Low	Grazing/herbivory/browsing	Direct	North and Central America	Yes	Negative
Bos_taurus	Bovidae	Cetartiodactyla	R_310	1987	Producers	MN	Weak	Low	Grazing/herbivory/browsing	Direct	North and Central America	Yes	Negative
Bos_taurus	Bovidae	Cetartiodactyla	R_310	1987	Producers	MN	Weak	Low	Grazing/herbivory/browsing	Direct	North and Central America	Yes	Negative
Bos_taurus	Bovidae	Cetartiodactyla	R_310	1987	Producers	MN	Weak	Low	Grazing/herbivory/browsing	Direct	North and Central America	Yes	Negative
Bos_taurus	Bovidae	Cetartiodactyla	R_310	1987	Producers	MN	Weak	Low	Grazing/herbivory/browsing	Direct	North and Central America	Yes	Negative
Capra_hircus	Bovidae	Cetartiodactyla	R_310	1987	Producers	MN	Weak	Low	Grazing/herbivory/browsing	Direct	North and Central America	Yes	Negative
Capra_hircus	Bovidae	Cetartiodactyla	R_310	1987	Producers	MN	Weak	Low	Grazing/herbivory/browsing	Direct	North and Central America	Yes	Negative
Capra_hircus	Bovidae	Cetartiodactyla	R_310	1987	Producers	MN	Weak	Low	Grazing/herbivory/browsing	Direct	North and Central America	Yes	Negative
Capra_hircus	Bovidae	Cetartiodactyla	R_310	1987	Producers	MN	Weak	Low	Grazing/herbivory/browsing	Direct	North and Central America	Yes	Negative
Capra_hircus	Bovidae	Cetartiodactyla	R_310	1987	Producers	MN	Weak	Low	Grazing/herbivory/browsing	Direct	North and Central America	Yes	Negative
Capra_hircus	Bovidae	Cetartiodactyla	R_310	1987	Producers	MN	Weak	Low	Grazing/herbivory/browsing	Direct	North and Central America	Yes	Negative
Capra_hircus	Bovidae	Cetartiodactyla	R_310	1987	Producers	MN	Weak	Low	Grazing/herbivory/browsing	Direct	North and Central America	Yes	Negative
Capra_hircus	Bovidae	Cetartiodactyla	R_310	1987	Producers	MN	Weak	Low	Grazing/herbivory/browsing	Direct	North and Central America	Yes	Negative
Equus_caballus	Equidae	Perissodactyla	R_310	1987	Producers	MN	Weak	Low	Grazing/herbivory/browsing	Direct	North and Central America	Yes	Negative
Equus_caballus	Equidae	Perissodactyla	R_310	1987	Producers	MN	Weak	Low	Grazing/herbivory/browsing	Direct	North and Central America	Yes	Negative
Equus_caballus	Equidae	Perissodactyla	R_310	1987	Producers	MN	Weak	Low	Grazing/herbivory/browsing	Direct	North and Central America	Yes	Negative
Equus_caballus	Equidae	Perissodactyla	R_310	1987	Producers	MN	Weak	Low	Grazing/herbivory/browsing	Direct	North and Central America	Yes	Negative
Equus_caballus	Equidae	Perissodactyla	R_310	1987	Producers	MN	Weak	Low	Grazing/herbivory/browsing	Direct	North and Central America	Yes	Negative
Equus_caballus	Equidae	Perissodactyla	R_310	1987	Producers	MN	Weak	Low	Grazing/herbivory/browsing	Direct	North and Central America	Yes	Negative
Equus_caballus	Equidae	Perissodactyla	R_310	1987	Producers	MN	Weak	Low	Grazing/herbivory/browsing	Direct	North and Central America	Yes	Negative
Ovis_aries	Bovidae	Cetartiodactyla	R_310	1987	Producers	MN	Weak	Low	Grazing/herbivory/browsing	Direct	North and Central America	Yes	Negative
Ovis_aries	Bovidae	Cetartiodactyla	R_310	1987	Producers	MN	Weak	Low	Grazing/herbivory/browsing	Direct	North and Central America	Yes	Negative
Ovis_aries	Bovidae	Cetartiodactyla	R_310	1987	Producers	MN	Weak	Low	Grazing/herbivory/browsing	Direct	North and Central America	Yes	Negative
Ovis_aries	Bovidae	Cetartiodactyla	R_310	1987	Producers	MN	Weak	Low	Grazing/herbivory/browsing	Direct	North and Central America	Yes	Negative
Ovis_aries	Bovidae	Cetartiodactyla	R_310	1987	Producers	MN	Weak	Low	Grazing/herbivory/browsing	Direct	North and Central America	Yes	Negative
Ovis_aries	Bovidae	Cetartiodactyla	R_310	1987	Producers	MN	Weak	Low	Grazing/herbivory/browsing	Direct	North and Central America	Yes	Negative
Ovis_aries	Bovidae	Cetartiodactyla	R_310	1987	Producers	MN	Weak	Low	Grazing/herbivory/browsing	Direct	North and Central America	Yes	Negative
Ovis_aries	Bovidae	Cetartiodactyla	R_310	1987	Producers	MN	Weak	Low	Grazing/herbivory/browsing	Direct	North and Central America	Yes	Negative
Capra_hircus	Bovidae	Cetartiodactyla	R_311	2001	Producers	MN	Weak	Low	Grazing/herbivory/browsing	Direct	Oceania	Yes	Negative
Capra_hircus	Bovidae	Cetartiodactyla	R_311	2001	Producers	MN	Weak	Low	Grazing/herbivory/browsing	Direct	Oceania	Yes	Negative
Capra_hircus	Bovidae	Cetartiodactyla	R_311	2001	Primary_consumers	MO	Strong	Medium	Competition	Indirect	Oceania	Yes	Negative
Sus_scrofa	Suidae	Cetartiodactyla	R_311	2001	Primary_consumers	MO	Strong	Low	Competition	Indirect	Oceania	Yes	Negative
Equus_asinus	Equidae	Perissodactyla	R_312	1983	Secondary_consumers	MC	Weak	Low	Chemical, physical or structural impact on ecosystems	Indirect	North and Central America	No	Negative
Equus_asinus	Equidae	Perissodactyla	R_312	1983	Secondary_consumers	MC	Weak	Low	Chemical, physical or structural impact on ecosystems	Indirect	North and Central America	No	Negative
Equus_asinus	Equidae	Perissodactyla	R_312	1983	Secondary_consumers	MC	Weak	Low	Chemical, physical or structural impact on ecosystems	Indirect	North and Central America	No	Negative
Equus_asinus	Equidae	Perissodactyla	R_312	1983	Secondary_consumers	MC	Weak	Low	Chemical, physical or structural impact on ecosystems	Indirect	North and Central America	No	Negative
Equus_asinus	Equidae	Perissodactyla	R_312	1983	Secondary_consumers	MC	Weak	Low	Chemical, physical or structural impact on ecosystems	Indirect	North and Central America	No	Negative
Equus_asinus	Equidae	Perissodactyla	R_312	1983	Primary_consumers	MC	Weak	Low	Chemical, physical or structural impact on ecosystems	Indirect	North and Central America	No	Negative
Equus_asinus	Equidae	Perissodactyla	R_312	1983	Primary_consumers	MC	Weak	Low	Chemical, physical or structural impact on ecosystems	Indirect	North and Central America	No	Negative
Equus_asinus	Equidae	Perissodactyla	R_312	1983	Producers	MN	Weak	Low	Grazing/herbivory/browsing	Direct	North and Central America	No	Negative
Equus_asinus	Equidae	Perissodactyla	R_312	1983	Producers	MN	Weak	Low	Grazing/herbivory/browsing	Direct	North and Central America	No	Negative
Equus_asinus	Equidae	Perissodactyla	R_312	1983	Producers	MN	Weak	Low	Grazing/herbivory/browsing	Direct	North and Central America	No	Negative
Equus_asinus	Equidae	Perissodactyla	R_312	1983	Primary_consumers	MC	Weak	Low	Chemical, physical or structural impact on ecosystems	Indirect	North and Central America	No	Negative
Equus_asinus	Equidae	Perissodactyla	R_312	1983	Primary_consumers	MC	Weak	Low	Chemical, physical or structural impact on ecosystems	Indirect	North and Central America	No	Negative
Equus_asinus	Equidae	Perissodactyla	R_312	1983	Primary_consumers	MC	Weak	Low	Chemical, physical or structural impact on ecosystems	Indirect	North and Central America	No	Negative
Equus_asinus	Equidae	Perissodactyla	R_312	1983	Secondary_consumers	MC	Weak	Low	Chemical, physical or structural impact on ecosystems	Indirect	North and Central America	No	Negative
Equus_asinus	Equidae	Perissodactyla	R_312	1983	Secondary_consumers	MC	Weak	Low	Chemical, physical or structural impact on ecosystems	Indirect	North and Central America	No	Negative
Equus_asinus	Equidae	Perissodactyla	R_312	1983	Secondary_consumers	MC	Weak	Low	Chemical, physical or structural impact on ecosystems	Indirect	North and Central America	No	Negative
Equus_asinus	Equidae	Perissodactyla	R_312	1983	Secondary_consumers	MC	Weak	Low	Chemical, physical or structural impact on ecosystems	Indirect	North and Central America	No	Negative
Equus_asinus	Equidae	Perissodactyla	R_312	1983	Secondary_consumers	MC	Weak	Low	Chemical, physical or structural impact on ecosystems	Indirect	North and Central America	No	Negative
Equus_asinus	Equidae	Perissodactyla	R_312	1983	Secondary_consumers	MC	Weak	Low	Chemical, physical or structural impact on ecosystems	Indirect	North_and_Central_America	No	Positive
Equus_asinus	Equidae	Perissodactyla	R_312	1983	Primary_consumers	MC	Weak	Low	Chemical, physical or structural impact on ecosystems	Indirect	North_and_Central_America	No	Positive
Equus_asinus	Equidae	Perissodactyla	R_312	1983	Primary_consumers	MC	Weak	Low	Chemical, physical or structural impact on ecosystems	Indirect	North_and_Central_America	No	Positive
Equus_asinus	Equidae	Perissodactyla	R_312	1983	Primary_consumers	MC	Weak	Low	Chemical, physical or structural impact on ecosystems	Indirect	North_and_Central_America	No	Positive
Equus_asinus	Equidae	Perissodactyla	R_312	1983	Primary_consumers	MC	Weak	Low	Chemical, physical or structural impact on ecosystems	Indirect	North_and_Central_America	No	Positive
Equus_asinus	Equidae	Perissodactyla	R_312	1983	Primary_consumers	MC	Weak	Low	Chemical, physical or structural impact on ecosystems	Indirect	North_and_Central_America	No	Positive
Equus_asinus	Equidae	Perissodactyla	R_312	1983	Secondary_consumers	MC	Weak	Low	Chemical, physical or structural impact on ecosystems	Indirect	North_and_Central_America	No	Positive
Equus_asinus	Equidae	Perissodactyla	R_312	1983	Secondary_consumers	MC	Weak	Low	Chemical, physical or structural impact on ecosystems	Indirect	North_and_Central_America	No	Positive
Equus_asinus	Equidae	Perissodactyla	R_312	1983	Secondary_consumers	MC	Weak	Low	Chemical, physical or structural impact on ecosystems	Indirect	North_and_Central_America	No	Positive
Equus_asinus	Equidae	Perissodactyla	R_312	1983	Secondary_consumers	MC	Weak	Low	Chemical, physical or structural impact on ecosystems	Indirect	North_and_Central_America	No	Positive
Equus_asinus	Equidae	Perissodactyla	R_312	1983	Secondary_consumers	MC	Weak	Low	Chemical, physical or structural impact on ecosystems	Indirect	North_and_Central_America	No	Positive
Equus_asinus	Equidae	Perissodactyla	R_312	1983	Secondary_consumers	MC	Weak	Low	Chemical, physical or structural impact on ecosystems	Indirect	North_and_Central_America	No	Positive
Equus_asinus	Equidae	Perissodactyla	R_312	1983	Secondary_consumers	MC	Weak	Low	Chemical, physical or structural impact on ecosystems	Indirect	North_and_Central_America	No	Positive
Equus_asinus	Equidae	Perissodactyla	R_312	1983	Secondary_consumers	MC	Weak	Low	Chemical, physical or structural impact on ecosystems	Indirect	North_and_Central_America	No	Positive
Equus_asinus	Equidae	Perissodactyla	R_312	1983	Secondary_consumers	MC	Weak	Low	Chemical, physical or structural impact on ecosystems	Indirect	North_and_Central_America	No	Positive
Capra_hircus	Bovidae	Cetartiodactyla	R_313	1967	Producers	MN	Weak	Medium	Grazing/herbivory/browsing	Direct	North and Central America	Yes	Negative
Capra_hircus	Bovidae	Cetartiodactyla	R_313	1967	Producers	MN	Weak	Medium	Grazing/herbivory/browsing	Direct	North and Central America	Yes	Negative
Capra_hircus	Bovidae	Cetartiodactyla	R_313	1967	Producers	MN	Weak	Medium	Grazing/herbivory/browsing	Direct	North and Central America	Yes	Negative
Equus_caballus	Equidae	Perissodactyla	R_314	2004	Secondary_consumers	MN	Weak	Low	Chemical, physical or structural impact on ecosystems	Indirect	South America	No	Negative
Equus_caballus	Equidae	Perissodactyla	R_314	2004	Secondary_consumers	MN	Weak	Low	Chemical, physical or structural impact on ecosystems	Indirect	South America	No	Negative
Equus_caballus	Equidae	Perissodactyla	R_314	2004	Secondary_consumers	MN	Weak	Low	Chemical, physical or structural impact on ecosystems	Indirect	South America	No	Negative
Equus_caballus	Equidae	Perissodactyla	R_314	2004	Secondary_consumers	MN	Weak	Low	Chemical, physical or structural impact on ecosystems	Indirect	South America	No	Negative
Equus_caballus	Equidae	Perissodactyla	R_314	2004	Secondary_consumers	MO	Strong	High	(10) Indirect impacts through interactions with other taxa	Indirect	South_America	No	Positive
Equus_caballus	Equidae	Perissodactyla	R_314	2004	Secondary_consumers	MO	Strong	High	(10) Indirect impacts through interactions with other taxa	Indirect	South_America	No	Positive
Equus_caballus	Equidae	Perissodactyla	R_314	2004	Secondary_consumers	MO	Strong	Medium	(10) Indirect impacts through interactions with other taxa	Indirect	South_America	No	Positive
Bos_taurus	Bovidae	Cetartiodactyla	R_315	2022	Producers	MO	Strong	High	(10) Indirect impacts through interactions with other taxa	Indirect	Asia	No	Positive
Bos_taurus	Bovidae	Cetartiodactyla	R_315	2022	Producers	MO	Strong	High	(10) Indirect impacts through interactions with other taxa	Indirect	Asia	No	Positive
Bos_taurus	Bovidae	Cetartiodactyla	R_315	2022	Primary_consumers	MO	Strong	High	(10) Indirect impacts through interactions with other taxa	Indirect	Asia	No	Positive
Cervus_nippon	Cervidae	Cetartiodactyla	R_32	2012	Primary_consumers	MO	Strong	High	Hybridisation	Direct	Europe; Asia	No	Negative
Rusa_unicolor	Cervidae	Cetartiodactyla	R_33	2013	Producers	MN	Weak	Medium	Direct physical disturbance	Direct	Oceania	No	Negative
Bubalus_bubalis	Bovidae	Cetartiodactyla	R_34	2014	Producers	MO	Strong	Low	Grazing/herbivory/browsing	Direct	South America	No	Negative
Bos_taurus	Bovidae	Cetartiodactyla	R_35	2012	Producers	MN	Weak	Medium	(10) Indirect impacts through interactions with other taxa	Indirect	South_America	No	Positive
Rusa_timorensis	Cervidae	Cetartiodactyla	R_36	1995	Producers	MR	Strong	Low	Grazing/herbivory/browsing	Direct	Oceania	Yes	Negative
Rusa_timorensis	Cervidae	Cetartiodactyla	R_36	1995	Producers	MO	Strong	Low	Grazing/herbivory/browsing	Direct	Oceania	Yes	Negative
Sus_scrofa	Suidae	Cetartiodactyla	R_37	2014	Producers	MN	Weak	Low	Direct physical disturbance	Direct	North and Central America	No	Negative
Sus_scrofa	Suidae	Cetartiodactyla	R_37	2014	Producers	MO	Strong	High	(10) Indirect impacts through interactions with other taxa	Indirect	North_and_Central_America	No	Positive
Equus_asinus	Equidae	Perissodactyla	R_38	1997	Producers	MN	Weak	Low	Grazing/herbivory/browsing	Direct	South America	Yes	Negative
Bubalus_bubalis	Bovidae	Cetartiodactyla	R_39	2008	Producers	MC	Weak	Low	Chemical, physical or structural impact on ecosystems	Indirect	Oceania	No	Negative
Bubalus_bubalis	Bovidae	Cetartiodactyla	R_39	2008	Producers	MC	Weak	Low	Chemical, physical or structural impact on ecosystems	Indirect	Oceania	No	Negative
Odocoileus_hemionus	Cervidae	Cetartiodactyla	R_4	2005	Secondary_consumers	MO	Strong	Medium	Chemical, physical or structural impact on ecosystems	Indirect	North and Central America	Yes	Negative
Odocoileus_hemionus	Cervidae	Cetartiodactyla	R_4	2005	Secondary_consumers	MO	Strong	Medium	Chemical, physical or structural impact on ecosystems	Indirect	North and Central America	Yes	Negative
Odocoileus_hemionus	Cervidae	Cetartiodactyla	R_4	2005	Secondary_consumers	MO	Strong	Medium	Chemical, physical or structural impact on ecosystems	Indirect	North and Central America	Yes	Negative
Odocoileus_hemionus	Cervidae	Cetartiodactyla	R_4	2005	Secondary_consumers	MO	Strong	Medium	Chemical, physical or structural impact on ecosystems	Indirect	North and Central America	Yes	Negative
Odocoileus_hemionus	Cervidae	Cetartiodactyla	R_4	2005	Secondary_consumers	MO	Strong	Medium	Chemical, physical or structural impact on ecosystems	Indirect	North and Central America	Yes	Negative
Odocoileus_hemionus	Cervidae	Cetartiodactyla	R_4	2005	Secondary_consumers	MO	Strong	Medium	Chemical, physical or structural impact on ecosystems	Indirect	North and Central America	Yes	Negative
Odocoileus_hemionus	Cervidae	Cetartiodactyla	R_4	2005	Secondary_consumers	MO	Strong	Medium	Chemical, physical or structural impact on ecosystems	Indirect	North and Central America	Yes	Negative
Odocoileus_hemionus	Cervidae	Cetartiodactyla	R_4	2005	Secondary_consumers	MO	Strong	Medium	Chemical, physical or structural impact on ecosystems	Indirect	North and Central America	Yes	Negative
Bubalus_bubalis	Bovidae	Cetartiodactyla	R_40	2010	Producers	MO	Strong	Medium	Chemical, physical or structural impact on ecosystems	Indirect	Oceania	No	Negative
Cervus_elaphus	Cervidae	Cetartiodactyla	R_41	2014	Producers	MN	Weak	Low	Grazing/herbivory/browsing; Direct physical disturbance	Direct	Oceania	No	Negative
Cervus_elaphus	Cervidae	Cetartiodactyla	R_41	2014	Producers	MN	Weak	Low	Grazing/herbivory/browsing; Direct physical disturbance	Direct	Oceania	No	Negative
Cervus_elaphus	Cervidae	Cetartiodactyla	R_41	2014	Producers	MN	Weak	Low	Grazing/herbivory/browsing; Direct physical disturbance	Direct	Oceania	No	Negative
Dama_dama	Cervidae	Cetartiodactyla	R_41	2014	Producers	MN	Weak	Low	Grazing/herbivory/browsing; Direct physical disturbance	Direct	Oceania	No	Negative
Dama_dama	Cervidae	Cetartiodactyla	R_41	2014	Producers	MN	Weak	Low	Grazing/herbivory/browsing; Direct physical disturbance	Direct	Oceania	No	Negative
Dama_dama	Cervidae	Cetartiodactyla	R_41	2014	Producers	MN	Weak	Low	Grazing/herbivory/browsing; Direct physical disturbance	Direct	Oceania	No	Negative
Dama_dama	Cervidae	Cetartiodactyla	R_41	2014	Producers	MN	Weak	Low	Grazing/herbivory/browsing; Direct physical disturbance	Direct	Oceania	No	Negative
Rusa_unicolor	Cervidae	Cetartiodactyla	R_41	2014	Producers	MN	Weak	Low	Grazing/herbivory/browsing; Direct physical disturbance	Direct	Oceania	No	Negative
Rusa_unicolor	Cervidae	Cetartiodactyla	R_41	2014	Producers	MN	Weak	Low	Grazing/herbivory/browsing; Direct physical disturbance	Direct	Oceania	No	Negative
Rusa_unicolor	Cervidae	Cetartiodactyla	R_41	2014	Producers	MN	Weak	Low	Grazing/herbivory/browsing; Direct physical disturbance	Direct	Oceania	No	Negative
Camelus_dromedarius	Camelidae	Cetartiodactyla	R_42	2016	Secondary_consumers	MR	Strong	Medium	Chemical, physical or structural impact on ecosystems	Indirect	Oceania	No	Negative
Camelus_dromedarius	Camelidae	Cetartiodactyla	R_43	2016	Producers	MN	Weak	Medium	Grazing/herbivory/browsing	Direct	Oceania	No	Negative
Camelus_dromedarius	Camelidae	Cetartiodactyla	R_43	2016	Producers	MN	Weak	Medium	Grazing/herbivory/browsing	Direct	Oceania	No	Negative
Camelus_dromedarius	Camelidae	Cetartiodactyla	R_43	2016	Producers	MN	Weak	Medium	Grazing/herbivory/browsing	Direct	Oceania	No	Negative
Camelus_dromedarius	Camelidae	Cetartiodactyla	R_43	2016	Producers	MN	Weak	Medium	Grazing/herbivory/browsing	Direct	Oceania	No	Negative
Camelus_dromedarius	Camelidae	Cetartiodactyla	R_43	2016	Producers	MN	Weak	Medium	Grazing/herbivory/browsing	Direct	Oceania	No	Negative
Camelus_dromedarius	Camelidae	Cetartiodactyla	R_43	2016	Producers	MN	Weak	Medium	Grazing/herbivory/browsing	Direct	Oceania	No	Negative
Camelus_dromedarius	Camelidae	Cetartiodactyla	R_43	2016	Producers	MN	Weak	Medium	Grazing/herbivory/browsing	Direct	Oceania	No	Negative
Camelus_dromedarius	Camelidae	Cetartiodactyla	R_43	2016	Producers	MN	Weak	Medium	Grazing/herbivory/browsing	Direct	Oceania	No	Negative
Camelus_dromedarius	Camelidae	Cetartiodactyla	R_43	2016	Producers	MN	Weak	Medium	Grazing/herbivory/browsing	Direct	Oceania	No	Negative
Camelus_dromedarius	Camelidae	Cetartiodactyla	R_43	2016	Producers	MN	Weak	Medium	Grazing/herbivory/browsing	Direct	Oceania	No	Negative
Camelus_dromedarius	Camelidae	Cetartiodactyla	R_43	2016	Producers	MN	Weak	Medium	Grazing/herbivory/browsing	Direct	Oceania	No	Negative
Bubalus_bubalis	Bovidae	Cetartiodactyla	R_44	1984	Primary_consumers	MC	Weak	Low	Chemical, physical or structural impact on ecosystems	Indirect	Oceania	No	Negative
Bubalus_bubalis	Bovidae	Cetartiodactyla	R_44	1984	Secondary_consumers	MC	Weak	Low	Chemical, physical or structural impact on ecosystems	Indirect	Oceania	No	Negative
Bubalus_bubalis	Bovidae	Cetartiodactyla	R_44	1984	Producers	MO	Strong	Low	Direct physical disturbance	Direct	Oceania	No	Negative
Bubalus_bubalis	Bovidae	Cetartiodactyla	R_44	1984	Secondary_consumers	MC	Weak	Low	Chemical, physical or structural impact on ecosystems	Indirect	Oceania	No	Negative
Bubalus_bubalis	Bovidae	Cetartiodactyla	R_44	1984	Secondary_consumers	MC	Weak	Low	Chemical, physical or structural impact on ecosystems	Indirect	Oceania	No	Negative
Bubalus_bubalis	Bovidae	Cetartiodactyla	R_44	1984	Secondary_consumers	MC	Weak	Low	Chemical, physical or structural impact on ecosystems	Indirect	Oceania	No	Negative
Bubalus_bubalis	Bovidae	Cetartiodactyla	R_44	1984	Secondary_consumers	MC	Weak	Low	Chemical, physical or structural impact on ecosystems	Indirect	Oceania	No	Negative
Bubalus_bubalis	Bovidae	Cetartiodactyla	R_44	1984	Secondary_consumers	MC	Weak	Low	Chemical, physical or structural impact on ecosystems	Indirect	Oceania	No	Negative
Bubalus_bubalis	Bovidae	Cetartiodactyla	R_44	1984	Secondary_consumers	MC	Weak	Low	Chemical, physical or structural impact on ecosystems	Indirect	Oceania	No	Negative
Bubalus_bubalis	Bovidae	Cetartiodactyla	R_44	1984	Secondary_consumers	MC	Weak	Low	Chemical, physical or structural impact on ecosystems	Indirect	Oceania	No	Negative
Bubalus_bubalis	Bovidae	Cetartiodactyla	R_44	1984	Secondary_consumers	MC	Weak	Low	Chemical, physical or structural impact on ecosystems	Indirect	Oceania	No	Negative
Bubalus_bubalis	Bovidae	Cetartiodactyla	R_44	1984	Secondary_consumers	MC	Weak	Low	Chemical, physical or structural impact on ecosystems	Indirect	Oceania	No	Negative
Bubalus_bubalis	Bovidae	Cetartiodactyla	R_44	1984	Secondary_consumers	MC	Weak	Low	Chemical, physical or structural impact on ecosystems	Indirect	Oceania	No	Negative
Bubalus_bubalis	Bovidae	Cetartiodactyla	R_44	1984	Secondary_consumers	MC	Weak	Low	Chemical, physical or structural impact on ecosystems	Indirect	Oceania	No	Negative
Bubalus_bubalis	Bovidae	Cetartiodactyla	R_44	1984	Secondary_consumers	MC	Weak	Low	Chemical, physical or structural impact on ecosystems	Indirect	Oceania	No	Negative
Bubalus_bubalis	Bovidae	Cetartiodactyla	R_44	1984	Secondary_consumers	MC	Weak	Low	Chemical, physical or structural impact on ecosystems	Indirect	Oceania	No	Negative
Bubalus_bubalis	Bovidae	Cetartiodactyla	R_44	1984	Secondary_consumers	MC	Weak	Low	Chemical, physical or structural impact on ecosystems	Indirect	Oceania	No	Negative
Bubalus_bubalis	Bovidae	Cetartiodactyla	R_44	1984	Secondary_consumers	MC	Weak	Low	Chemical, physical or structural impact on ecosystems	Indirect	Oceania	No	Negative
Bubalus_bubalis	Bovidae	Cetartiodactyla	R_44	1984	Secondary_consumers	MC	Weak	Low	Chemical, physical or structural impact on ecosystems	Indirect	Oceania	No	Negative
Bubalus_bubalis	Bovidae	Cetartiodactyla	R_44	1984	Secondary_consumers	MC	Weak	Low	Chemical, physical or structural impact on ecosystems	Indirect	Oceania	No	Negative
Bubalus_bubalis	Bovidae	Cetartiodactyla	R_44	1984	Secondary_consumers	MC	Weak	Low	Chemical, physical or structural impact on ecosystems	Indirect	Oceania	No	Negative
Bubalus_bubalis	Bovidae	Cetartiodactyla	R_44	1984	Secondary_consumers	MC	Weak	Low	Chemical, physical or structural impact on ecosystems	Indirect	Oceania	No	Negative
Bubalus_bubalis	Bovidae	Cetartiodactyla	R_44	1984	Secondary_consumers	MO	Strong	Low	Chemical, physical or structural impact on ecosystems	Indirect	Oceania	No	Negative
Bubalus_bubalis	Bovidae	Cetartiodactyla	R_44	1984	Secondary_consumers	MO	Strong	Low	Chemical, physical or structural impact on ecosystems	Indirect	Oceania	No	Negative
Bubalus_bubalis	Bovidae	Cetartiodactyla	R_44	1984	Primary_consumers	MO	Strong	Low	Chemical, physical or structural impact on ecosystems	Indirect	Oceania	No	Negative
Bubalus_bubalis	Bovidae	Cetartiodactyla	R_44	1984	Secondary_consumers	MO	Strong	Low	Chemical, physical or structural impact on ecosystems	Indirect	Oceania	No	Negative
Bubalus_bubalis	Bovidae	Cetartiodactyla	R_44	1984	Secondary_consumers	MO	Strong	Low	Chemical, physical or structural impact on ecosystems	Indirect	Oceania	No	Negative
Bubalus_bubalis	Bovidae	Cetartiodactyla	R_44	1984	Primary_consumers	MC	Weak	Low	Chemical, physical or structural impact on ecosystems	Indirect	Oceania	No	Negative
Bubalus_bubalis	Bovidae	Cetartiodactyla	R_44	1984	Primary_consumers	MC	Weak	Low	Chemical, physical or structural impact on ecosystems	Indirect	Oceania	No	Negative
Bubalus_bubalis	Bovidae	Cetartiodactyla	R_44	1984	Secondary_consumers	MO	Strong	Low	Chemical, physical or structural impact on ecosystems	Indirect	Oceania	No	Negative
Bubalus_bubalis	Bovidae	Cetartiodactyla	R_44	1984	Secondary_consumers	MO	Strong	Low	Chemical, physical or structural impact on ecosystems	Indirect	Oceania	No	Negative
Bubalus_bubalis	Bovidae	Cetartiodactyla	R_44	1984	Secondary_consumers	MO	Strong	Low	Chemical, physical or structural impact on ecosystems	Indirect	Oceania	No	Negative
Bubalus_bubalis	Bovidae	Cetartiodactyla	R_44	1984	Secondary_consumers	MO	Strong	Low	Chemical, physical or structural impact on ecosystems	Indirect	Oceania	No	Negative
Bubalus_bubalis	Bovidae	Cetartiodactyla	R_44	1984	Secondary_consumers	MO	Strong	Low	Chemical, physical or structural impact on ecosystems	Indirect	Oceania	No	Negative
Bubalus_bubalis	Bovidae	Cetartiodactyla	R_44	1984	Secondary_consumers	MO	Strong	Low	Chemical, physical or structural impact on ecosystems	Indirect	Oceania	No	Negative
Bubalus_bubalis	Bovidae	Cetartiodactyla	R_44	1984	Secondary_consumers	MO	Strong	Low	Chemical, physical or structural impact on ecosystems	Indirect	Oceania	No	Negative
Bubalus_bubalis	Bovidae	Cetartiodactyla	R_44	1984	Secondary_consumers	MO	Strong	Low	Chemical, physical or structural impact on ecosystems	Indirect	Oceania	No	Negative
Bubalus_bubalis	Bovidae	Cetartiodactyla	R_44	1984	Secondary_consumers	MO	Strong	Low	Chemical, physical or structural impact on ecosystems	Indirect	Oceania	No	Negative
Bubalus_bubalis	Bovidae	Cetartiodactyla	R_44	1984	Secondary_consumers	MC	Weak	Low	Chemical, physical or structural impact on ecosystems	Indirect	Oceania	No	Positive
Bubalus_bubalis	Bovidae	Cetartiodactyla	R_44	1984	Secondary_consumers	MC	Weak	Low	Chemical, physical or structural impact on ecosystems	Indirect	Oceania	No	Positive
Bubalus_bubalis	Bovidae	Cetartiodactyla	R_44	1984	Secondary_consumers	MC	Weak	Low	Chemical, physical or structural impact on ecosystems	Indirect	Oceania	No	Positive
Bubalus_bubalis	Bovidae	Cetartiodactyla	R_44	1984	Secondary_consumers	MC	Weak	Low	Chemical, physical or structural impact on ecosystems	Indirect	Oceania	No	Positive
Bubalus_bubalis	Bovidae	Cetartiodactyla	R_44	1984	Secondary_consumers	MC	Weak	Low	Chemical, physical or structural impact on ecosystems	Indirect	Oceania	No	Positive
Bubalus_bubalis	Bovidae	Cetartiodactyla	R_44	1984	Secondary_consumers	MC	Weak	Low	Chemical, physical or structural impact on ecosystems	Indirect	Oceania	No	Positive
Bubalus_bubalis	Bovidae	Cetartiodactyla	R_44	1984	Secondary_consumers	MC	Weak	Low	Chemical, physical or structural impact on ecosystems	Indirect	Oceania	No	Positive
Bubalus_bubalis	Bovidae	Cetartiodactyla	R_44	1984	Secondary_consumers	MC	Weak	Low	Chemical, physical or structural impact on ecosystems	Indirect	Oceania	No	Positive
Bubalus_bubalis	Bovidae	Cetartiodactyla	R_44	1984	Secondary_consumers	MC	Weak	Low	Chemical, physical or structural impact on ecosystems	Indirect	Oceania	No	Positive
Bubalus_bubalis	Bovidae	Cetartiodactyla	R_44	1984	Secondary_consumers	MC	Weak	Low	Chemical, physical or structural impact on ecosystems	Indirect	Oceania	No	Positive
Bubalus_bubalis	Bovidae	Cetartiodactyla	R_44	1984	Secondary_consumers	MC	Weak	Low	Chemical, physical or structural impact on ecosystems	Indirect	Oceania	No	Positive
Bubalus_bubalis	Bovidae	Cetartiodactyla	R_44	1984	Secondary_consumers	MC	Weak	Low	Chemical, physical or structural impact on ecosystems	Indirect	Oceania	No	Positive
Bubalus_bubalis	Bovidae	Cetartiodactyla	R_44	1984	Secondary_consumers	MC	Weak	Low	Chemical, physical or structural impact on ecosystems	Indirect	Oceania	No	Positive
Bubalus_bubalis	Bovidae	Cetartiodactyla	R_44	1984	Secondary_consumers	MC	Weak	Low	Chemical, physical or structural impact on ecosystems	Indirect	Oceania	No	Positive
Bubalus_bubalis	Bovidae	Cetartiodactyla	R_44	1984	Primary_consumers	MC	Weak	Low	Chemical, physical or structural impact on ecosystems	Indirect	Oceania	No	Positive
Bubalus_bubalis	Bovidae	Cetartiodactyla	R_44	1984	Primary_consumers	MC	Weak	Low	Chemical, physical or structural impact on ecosystems	Indirect	Oceania	No	Positive
Bubalus_bubalis	Bovidae	Cetartiodactyla	R_44	1984	Primary_consumers	MC	Weak	Low	Chemical, physical or structural impact on ecosystems	Indirect	Oceania	No	Positive
Bubalus_bubalis	Bovidae	Cetartiodactyla	R_44	1984	Secondary_consumers	MC	Weak	Low	Chemical, physical or structural impact on ecosystems	Indirect	Oceania	No	Positive
Bubalus_bubalis	Bovidae	Cetartiodactyla	R_44	1984	Secondary_consumers	MC	Weak	Low	Chemical, physical or structural impact on ecosystems	Indirect	Oceania	No	Positive
Bubalus_bubalis	Bovidae	Cetartiodactyla	R_44	1984	Secondary_consumers	MC	Weak	Low	Chemical, physical or structural impact on ecosystems	Indirect	Oceania	No	Positive
Bubalus_bubalis	Bovidae	Cetartiodactyla	R_44	1984	Secondary_consumers	MC	Weak	Low	Chemical, physical or structural impact on ecosystems	Indirect	Oceania	No	Positive
Bubalus_bubalis	Bovidae	Cetartiodactyla	R_44	1984	Secondary_consumers	MC	Weak	Low	Chemical, physical or structural impact on ecosystems	Indirect	Oceania	No	Positive
Bubalus_bubalis	Bovidae	Cetartiodactyla	R_44	1984	Secondary_consumers	MC	Weak	Low	Chemical, physical or structural impact on ecosystems	Indirect	Oceania	No	Positive
Bubalus_bubalis	Bovidae	Cetartiodactyla	R_44	1984	Secondary_consumers	MO	Strong	Medium	(10) Indirect impacts through interactions with other taxa	Indirect	Oceania	No	Positive
Bubalus_bubalis	Bovidae	Cetartiodactyla	R_44	1984	Secondary_consumers	MO	Strong	Medium	(10) Indirect impacts through interactions with other taxa	Indirect	Oceania	No	Positive
Bubalus_bubalis	Bovidae	Cetartiodactyla	R_44	1984	Secondary_consumers	MO	Strong	Medium	(10) Indirect impacts through interactions with other taxa	Indirect	Oceania	No	Positive
Bubalus_bubalis	Bovidae	Cetartiodactyla	R_44	1984	Secondary_consumers	MO	Strong	Medium	(10) Indirect impacts through interactions with other taxa	Indirect	Oceania	No	Positive
Bubalus_bubalis	Bovidae	Cetartiodactyla	R_44	1984	Secondary_consumers	MO	Strong	Medium	(10) Indirect impacts through interactions with other taxa	Indirect	Oceania	No	Positive
Bubalus_bubalis	Bovidae	Cetartiodactyla	R_44	1984	Secondary_consumers	MO	Strong	Medium	(10) Indirect impacts through interactions with other taxa	Indirect	Oceania	No	Positive
Bubalus_bubalis	Bovidae	Cetartiodactyla	R_44	1984	Secondary_consumers	MO	Strong	Medium	(10) Indirect impacts through interactions with other taxa	Indirect	Oceania	No	Positive
Bubalus_bubalis	Bovidae	Cetartiodactyla	R_44	1984	Secondary_consumers	MO	Strong	Low	Chemical, physical or structural impact on ecosystems	Indirect	Oceania	No	Positive
Bubalus_bubalis	Bovidae	Cetartiodactyla	R_44	1984	Secondary_consumers	MO	Strong	Medium	Chemical, physical or structural impact on ecosystems	Indirect	Oceania	No	Positive
Bubalus_bubalis	Bovidae	Cetartiodactyla	R_44	1984	Secondary_consumers	MO	Strong	Low	Chemical, physical or structural impact on ecosystems	Indirect	Oceania	No	Positive
Bubalus_bubalis	Bovidae	Cetartiodactyla	R_44	1984	Secondary_consumers	MO	Strong	Low	Chemical, physical or structural impact on ecosystems	Indirect	Oceania	No	Positive
Bubalus_bubalis	Bovidae	Cetartiodactyla	R_44	1984	Secondary_consumers	MO	Strong	Medium	Chemical, physical or structural impact on ecosystems	Indirect	Oceania	No	Positive
Bubalus_bubalis	Bovidae	Cetartiodactyla	R_44	1984	Secondary_consumers	MO	Strong	Low	Chemical, physical or structural impact on ecosystems	Indirect	Oceania	No	Positive
Bubalus_bubalis	Bovidae	Cetartiodactyla	R_44	1984	Secondary_consumers	MO	Strong	Low	Chemical, physical or structural impact on ecosystems	Indirect	Oceania	No	Positive
Bubalus_bubalis	Bovidae	Cetartiodactyla	R_44	1984	Secondary_consumers	MO	Strong	Low	Chemical, physical or structural impact on ecosystems	Indirect	Oceania	No	Positive
Bubalus_bubalis	Bovidae	Cetartiodactyla	R_44	1984	Secondary_consumers	MO	Strong	Low	Chemical, physical or structural impact on ecosystems	Indirect	Oceania	No	Positive
Bubalus_bubalis	Bovidae	Cetartiodactyla	R_44	1984	Secondary_consumers	MO	Strong	Low	Chemical, physical or structural impact on ecosystems	Indirect	Oceania	No	Positive
Bubalus_bubalis	Bovidae	Cetartiodactyla	R_44	1984	Secondary_consumers	MO	Strong	Low	Chemical, physical or structural impact on ecosystems	Indirect	Oceania	No	Positive
Bubalus_bubalis	Bovidae	Cetartiodactyla	R_44	1984	Secondary_consumers	MO	Strong	Low	Chemical, physical or structural impact on ecosystems	Indirect	Oceania	No	Positive
Bubalus_bubalis	Bovidae	Cetartiodactyla	R_44	1984	Secondary_consumers	MO	Strong	Low	Chemical, physical or structural impact on ecosystems	Indirect	Oceania	No	Positive
Bubalus_bubalis	Bovidae	Cetartiodactyla	R_44	1984	Secondary_consumers	MO	Strong	Low	Chemical, physical or structural impact on ecosystems	Indirect	Oceania	No	Positive
Bubalus_bubalis	Bovidae	Cetartiodactyla	R_44	1984	Secondary_consumers	MO	Strong	Low	Chemical, physical or structural impact on ecosystems	Indirect	Oceania	No	Positive
Bubalus_bubalis	Bovidae	Cetartiodactyla	R_44	1984	Secondary_consumers	MO	Strong	Low	Chemical, physical or structural impact on ecosystems	Indirect	Oceania	No	Positive
Bubalus_bubalis	Bovidae	Cetartiodactyla	R_44	1984	Secondary_consumers	MO	Strong	Low	Chemical, physical or structural impact on ecosystems	Indirect	Oceania	No	Positive
Bubalus_bubalis	Bovidae	Cetartiodactyla	R_44	1984	Secondary_consumers	MO	Strong	Low	Chemical, physical or structural impact on ecosystems	Indirect	Oceania	No	Positive
Sus_scrofa	Suidae	Cetartiodactyla	R_45	1982	Producers	MO	Strong	Low	Direct physical disturbance	Direct	North and Central America	No	Negative
Sus_scrofa	Suidae	Cetartiodactyla	R_45	1982	Producers	MO	Strong	Low	Direct physical disturbance	Direct	North and Central America	No	Negative
Sus_scrofa	Suidae	Cetartiodactyla	R_45	1982	Producers	MO	Strong	Low	Direct physical disturbance	Direct	North and Central America	No	Negative
Sus_scrofa	Suidae	Cetartiodactyla	R_45	1982	Producers	MO	Strong	Low	Direct physical disturbance	Direct	North and Central America	No	Negative
Sus_scrofa	Suidae	Cetartiodactyla	R_46	1974	Producers	MO	Strong	Low	Direct physical disturbance	Direct	North and Central America	No	Negative
Sus_scrofa	Suidae	Cetartiodactyla	R_46	1974	Producers	MO	Strong	Low	Direct physical disturbance	Direct	North and Central America	No	Negative
Sus_scrofa	Suidae	Cetartiodactyla	R_46	1974	Producers	MO	Strong	Low	Direct physical disturbance	Direct	North and Central America	No	Negative
Sus_scrofa	Suidae	Cetartiodactyla	R_46	1974	Producers	MO	Strong	Low	Direct physical disturbance	Direct	North and Central America	No	Negative
Sus_scrofa	Suidae	Cetartiodactyla	R_46	1974	Producers	MO	Strong	Low	Direct physical disturbance	Direct	North and Central America	No	Negative
Sus_scrofa	Suidae	Cetartiodactyla	R_46	1974	Producers	MO	Strong	Low	Direct physical disturbance	Direct	North and Central America	No	Negative
Sus_scrofa	Suidae	Cetartiodactyla	R_47	1975	Producers	MO	Strong	Low	Direct physical disturbance	Direct	North and Central America	No	Negative
Camelus_dromedarius	Camelidae	Cetartiodactyla	R_48	2010	Producers	MN	Weak	Medium	Grazing/herbivory/browsing	Direct	Oceania	No	Negative
Camelus_dromedarius	Camelidae	Cetartiodactyla	R_48	2010	Producers	MN	Weak	Medium	Grazing/herbivory/browsing	Direct	Oceania	No	Negative
Camelus_dromedarius	Camelidae	Cetartiodactyla	R_48	2010	Producers	MN	Weak	Medium	Grazing/herbivory/browsing	Direct	Oceania	No	Negative
Capra_hircus	Bovidae	Cetartiodactyla	R_49	2002	Producers	MO	Strong	Medium	Grazing/herbivory/browsing	Direct	Africa	Yes	Negative
Capra_hircus	Bovidae	Cetartiodactyla	R_49	2002	Producers	MO	Strong	Medium	Grazing/herbivory/browsing	Direct	Africa	Yes	Negative
Capra_hircus	Bovidae	Cetartiodactyla	R_49	2002	Producers	MO	Strong	Medium	Grazing/herbivory/browsing	Direct	Africa	Yes	Negative
Capra_hircus	Bovidae	Cetartiodactyla	R_49	2002	Producers	MO	Strong	Medium	Grazing/herbivory/browsing	Direct	Africa	Yes	Negative
Capra_hircus	Bovidae	Cetartiodactyla	R_49	2002	Producers	MO	Strong	Medium	Grazing/herbivory/browsing	Direct	Africa	Yes	Negative
Capra_hircus	Bovidae	Cetartiodactyla	R_49	2002	Producers	MO	Strong	Medium	Grazing/herbivory/browsing	Direct	Africa	Yes	Negative
Capra_hircus	Bovidae	Cetartiodactyla	R_49	2002	Producers	MO	Strong	Medium	Grazing/herbivory/browsing	Direct	Africa	Yes	Negative
Capra_hircus	Bovidae	Cetartiodactyla	R_49	2002	Producers	MO	Strong	Medium	Grazing/herbivory/browsing	Direct	Africa	Yes	Negative
Odocoileus_hemionus	Cervidae	Cetartiodactyla	R_5	2005	Secondary_consumers	MO	Strong	Low	Chemical, physical or structural impact on ecosystems	Indirect	North and Central America	Yes	Negative
Odocoileus_hemionus	Cervidae	Cetartiodactyla	R_5	2005	Primary_consumers	MO	Strong	Low	Chemical, physical or structural impact on ecosystems	Indirect	North and Central America	Yes	Negative
Odocoileus_hemionus	Cervidae	Cetartiodactyla	R_5	2005	Primary_consumers	MO	Strong	Low	Chemical, physical or structural impact on ecosystems	Indirect	North and Central America	Yes	Negative
Odocoileus_hemionus	Cervidae	Cetartiodactyla	R_5	2005	Primary_consumers	MO	Strong	Low	Chemical, physical or structural impact on ecosystems	Indirect	North and Central America	Yes	Negative
Sus_scrofa	Suidae	Cetartiodactyla	R_51	2010	Producers	MN	Weak	Medium	Direct physical disturbance	Direct	North and Central America	Yes	Negative
Sus_scrofa	Suidae	Cetartiodactyla	R_51	2010	Producers	MN	Weak	Medium	Direct physical disturbance	Direct	North and Central America	Yes	Negative
Sus_scrofa	Suidae	Cetartiodactyla	R_51	2010	Producers	MN	Weak	Medium	Direct physical disturbance	Direct	North and Central America	Yes	Negative
Sus_scrofa	Suidae	Cetartiodactyla	R_51	2010	Producers	MN	Weak	Medium	Direct physical disturbance	Direct	North and Central America	Yes	Negative
Oryx_gazella	Bovidae	Cetartiodactyla	R_52	2017	Primary_consumers	MN	Weak	Low	Competition	Indirect	North and Central America	No	Negative
Sus_scrofa	Suidae	Cetartiodactyla	R_53	1984	Producers	MO	Strong	Low	Direct physical disturbance	Direct	Oceania	Yes	Negative
Odocoileus_virginianus	Cervidae	Cetartiodactyla	R_54	2007	Producers	MN	Weak	Medium	Grazing/herbivory/browsing	Direct	North and Central America	Yes	Negative
Odocoileus_virginianus	Cervidae	Cetartiodactyla	R_54	2007	Producers	MN	Weak	Medium	Grazing/herbivory/browsing	Direct	North and Central America	Yes	Negative
Hemitragus_jemlahicus	Bovidae	Cetartiodactyla	R_55	1970	Producers	MO	Strong	Low	Grazing/herbivory/browsing	Direct	Oceania	Yes	Negative
Hemitragus_jemlahicus	Bovidae	Cetartiodactyla	R_55	1970	Producers	MO	Strong	Low	Grazing/herbivory/browsing	Direct	Oceania	Yes	Negative
Hemitragus_jemlahicus	Bovidae	Cetartiodactyla	R_55	1970	Producers	MO	Strong	Low	Grazing/herbivory/browsing	Direct	Oceania	Yes	Negative
Hemitragus_jemlahicus	Bovidae	Cetartiodactyla	R_55	1970	Producers	MN	Weak	Medium	(10) Indirect impacts through interactions with other taxa	Indirect	Oceania	Yes	Positive
Muntiacus_reevesi	Cervidae	Cetartiodactyla	R_56	1993	Primary_consumers	MO	Strong	Low	Competition	Indirect	Europe	Yes	Negative
Odocoileus_hemionus	Cervidae	Cetartiodactyla	R_57	2015	Secondary_consumers	MO	Strong	Medium	Chemical, physical or structural impact on ecosystems	Indirect	North and Central America	Yes	Negative
Odocoileus_hemionus	Cervidae	Cetartiodactyla	R_57	2015	Secondary_consumers	MO	Strong	Medium	Chemical, physical or structural impact on ecosystems	Indirect	North and Central America	Yes	Negative
Odocoileus_hemionus	Cervidae	Cetartiodactyla	R_57	2015	Secondary_consumers	MO	Strong	Medium	Chemical, physical or structural impact on ecosystems	Indirect	North and Central America	Yes	Negative
Odocoileus_hemionus	Cervidae	Cetartiodactyla	R_57	2015	Secondary_consumers	MO	Strong	Medium	Chemical, physical or structural impact on ecosystems	Indirect	North and Central America	Yes	Negative
Odocoileus_hemionus	Cervidae	Cetartiodactyla	R_57	2015	Secondary_consumers	MO	Strong	Medium	Chemical, physical or structural impact on ecosystems	Indirect	North and Central America	Yes	Negative
Odocoileus_hemionus	Cervidae	Cetartiodactyla	R_57	2015	Secondary_consumers	MO	Strong	Medium	Chemical, physical or structural impact on ecosystems	Indirect	North and Central America	Yes	Negative
Odocoileus_hemionus	Cervidae	Cetartiodactyla	R_57	2015	Secondary_consumers	MO	Strong	Medium	Chemical, physical or structural impact on ecosystems	Indirect	North and Central America	Yes	Negative
Odocoileus_hemionus	Cervidae	Cetartiodactyla	R_57	2015	Secondary_consumers	MO	Strong	Medium	Chemical, physical or structural impact on ecosystems	Indirect	North and Central America	Yes	Negative
Odocoileus_virginianus	Cervidae	Cetartiodactyla	R_58	2001	Producers	MN	Weak	Medium	Grazing/herbivory/browsing	Direct	North and Central America	Yes	Negative
Odocoileus_virginianus	Cervidae	Cetartiodactyla	R_59	2005	Producers	MN	Weak	Medium	Grazing/herbivory/browsing	Direct	North and Central America	Yes	Negative
Odocoileus_virginianus	Cervidae	Cetartiodactyla	R_59	2005	Producers	MN	Weak	Medium	Grazing/herbivory/browsing	Direct	North and Central America	Yes	Negative
Capra_hircus	Bovidae	Cetartiodactyla	R_6	2011	Producers	MR	Strong	Low	Grazing/herbivory/browsing	Direct	South America	Yes	Negative
Capra_hircus	Bovidae	Cetartiodactyla	R_6	2011	Producers	MR	Strong	Low	Grazing/herbivory/browsing	Direct	South America	Yes	Negative
Capra_hircus	Bovidae	Cetartiodactyla	R_6	2011	Producers	MR	Strong	Low	Grazing/herbivory/browsing	Direct	South America	Yes	Negative
Capra_hircus	Bovidae	Cetartiodactyla	R_6	2011	Producers	MO	Strong	Low	Grazing/herbivory/browsing	Direct	South America	Yes	Negative
Capra_hircus	Bovidae	Cetartiodactyla	R_6	2011	Secondary_consumers	MO	Strong	Low	Predation	Direct	South America	Yes	Negative
Capra_hircus	Bovidae	Cetartiodactyla	R_6	2011	Secondary_consumers	MO	Strong	Low	Predation	Direct	South America	Yes	Negative
Capra_hircus	Bovidae	Cetartiodactyla	R_6	2011	Secondary_consumers	MO	Strong	Low	Predation	Direct	South America	Yes	Negative
Oreamnos_americanus	Bovidae	Cetartiodactyla	R_60	2012	Producers	MC	Weak	Low	Grazing/herbivory/browsing	Direct	North and Central America	Yes	Negative
Oreamnos_americanus	Bovidae	Cetartiodactyla	R_60	2012	Producers	MC	Weak	Low	Grazing/herbivory/browsing	Direct	North and Central America	Yes	Negative
Oreamnos_americanus	Bovidae	Cetartiodactyla	R_60	2012	Producers	MC	Weak	Low	Grazing/herbivory/browsing	Direct	North and Central America	Yes	Negative
Oreamnos_americanus	Bovidae	Cetartiodactyla	R_60	2012	Producers	MC	Weak	Low	Grazing/herbivory/browsing	Direct	North and Central America	Yes	Negative
Oreamnos_americanus	Bovidae	Cetartiodactyla	R_60	2012	Producers	MC	Weak	Low	Grazing/herbivory/browsing	Direct	North and Central America	Yes	Negative
Oreamnos_americanus	Bovidae	Cetartiodactyla	R_60	2012	Producers	MC	Weak	Low	Grazing/herbivory/browsing	Direct	North and Central America	Yes	Negative
Oreamnos_americanus	Bovidae	Cetartiodactyla	R_60	2012	Producers	MC	Weak	Low	Grazing/herbivory/browsing	Direct	North and Central America	Yes	Negative
Oreamnos_americanus	Bovidae	Cetartiodactyla	R_60	2012	Producers	MC	Weak	Low	Grazing/herbivory/browsing	Direct	North and Central America	Yes	Negative
Oreamnos_americanus	Bovidae	Cetartiodactyla	R_60	2012	Producers	MC	Weak	Low	Grazing/herbivory/browsing	Direct	North and Central America	Yes	Negative
Oreamnos_americanus	Bovidae	Cetartiodactyla	R_60	2012	Producers	MC	Weak	Low	Grazing/herbivory/browsing	Direct	North and Central America	Yes	Negative
Oreamnos_americanus	Bovidae	Cetartiodactyla	R_60	2012	Producers	MC	Weak	Low	Grazing/herbivory/browsing	Direct	North and Central America	Yes	Negative
Oreamnos_americanus	Bovidae	Cetartiodactyla	R_60	2012	Producers	MC	Weak	Low	Grazing/herbivory/browsing	Direct	North and Central America	Yes	Negative
Oreamnos_americanus	Bovidae	Cetartiodactyla	R_60	2012	Producers	MC	Weak	Low	Grazing/herbivory/browsing	Direct	North and Central America	Yes	Negative
Capra_hircus	Bovidae	Cetartiodactyla	R_61	1978	Producers	MO	Strong	Low	Grazing/herbivory/browsing	Direct	North and Central America	Yes	Negative
Capra_hircus	Bovidae	Cetartiodactyla	R_62	1987	Producers	MN	Weak	Medium	Grazing/herbivory/browsing	Direct	Africa	Yes	Negative
Capra_hircus	Bovidae	Cetartiodactyla	R_62	1987	Producers	MN	Weak	Medium	Grazing/herbivory/browsing	Direct	Africa	Yes	Negative
Capra_hircus	Bovidae	Cetartiodactyla	R_62	1987	Producers	MN	Weak	Medium	Grazing/herbivory/browsing	Direct	Africa	Yes	Negative
Capra_hircus	Bovidae	Cetartiodactyla	R_62	1987	Primary_consumers	MN	Weak	Low	Competition	Indirect	Africa	Yes	Negative
Sus_scrofa	Suidae	Cetartiodactyla	R_63	2014	Producers	MO	Strong	Medium	Direct physical disturbance	Direct	North and Central America	Yes	Negative
Sus_scrofa	Suidae	Cetartiodactyla	R_63	2014	Producers	MO	Strong	Medium	Direct physical disturbance	Direct	North and Central America	Yes	Negative
Sus_scrofa	Suidae	Cetartiodactyla	R_63	2014	Producers	MO	Strong	Medium	Direct physical disturbance	Direct	North and Central America	Yes	Negative
Sus_scrofa	Suidae	Cetartiodactyla	R_63	2014	Producers	MO	Strong	Medium	Direct physical disturbance	Direct	North and Central America	Yes	Negative
Sus_scrofa	Suidae	Cetartiodactyla	R_63	2014	Producers	MO	Strong	Medium	Direct physical disturbance	Direct	North and Central America	Yes	Negative
Sus_scrofa	Suidae	Cetartiodactyla	R_63	2014	Producers	MO	Strong	Medium	Direct physical disturbance	Direct	North and Central America	Yes	Negative
Sus_scrofa	Suidae	Cetartiodactyla	R_63	2014	Producers	MO	Strong	Medium	Direct physical disturbance	Direct	North and Central America	Yes	Negative
Sus_scrofa	Suidae	Cetartiodactyla	R_63	2014	Producers	MO	Strong	Medium	Direct physical disturbance	Direct	North and Central America	Yes	Negative
Sus_scrofa	Suidae	Cetartiodactyla	R_63	2014	Producers	MO	Strong	Medium	Direct physical disturbance	Direct	North and Central America	Yes	Negative
Sus_scrofa	Suidae	Cetartiodactyla	R_63	2014	Producers	MO	Strong	Medium	Direct physical disturbance	Direct	North and Central America	Yes	Negative
Sus_scrofa	Suidae	Cetartiodactyla	R_63	2014	Producers	MO	Strong	Medium	Direct physical disturbance	Direct	North and Central America	Yes	Negative
Sus_scrofa	Suidae	Cetartiodactyla	R_63	2014	Producers	MO	Strong	Medium	Direct physical disturbance	Direct	North and Central America	Yes	Negative
Sus_scrofa	Suidae	Cetartiodactyla	R_63	2014	Producers	MO	Strong	Medium	Direct physical disturbance	Direct	North and Central America	Yes	Negative
Sus_scrofa	Suidae	Cetartiodactyla	R_64	2012	Producers	MO	Strong	Medium	Direct physical disturbance	Direct	North and Central America	Yes	Negative
Sus_scrofa	Suidae	Cetartiodactyla	R_64	2012	Producers	MO	Strong	Medium	Direct physical disturbance	Direct	North and Central America	Yes	Negative
Sus_scrofa	Suidae	Cetartiodactyla	R_64	2012	Producers	MO	Strong	Medium	Direct physical disturbance	Direct	North and Central America	Yes	Negative
Sus_scrofa	Suidae	Cetartiodactyla	R_64	2012	Producers	MO	Strong	Medium	Direct physical disturbance	Direct	North and Central America	Yes	Negative
Sus_scrofa	Suidae	Cetartiodactyla	R_64	2012	Producers	MO	Strong	Medium	Direct physical disturbance	Direct	North and Central America	Yes	Negative
Sus_scrofa	Suidae	Cetartiodactyla	R_64	2012	Producers	MO	Strong	Medium	Direct physical disturbance	Direct	North and Central America	Yes	Negative
Sus_scrofa	Suidae	Cetartiodactyla	R_64	2012	Producers	MO	Strong	Medium	Direct physical disturbance	Direct	North and Central America	Yes	Negative
Sus_scrofa	Suidae	Cetartiodactyla	R_65	2001	Primary_consumers	MN	Weak	Medium	Predation	Direct	Oceania	Yes	Negative
Muntiacus_reevesi	Cervidae	Cetartiodactyla	R_66	2006	Producers	MO	Strong	Low	Grazing/herbivory/browsing	Direct	Europe	Yes	Negative
Muntiacus_reevesi	Cervidae	Cetartiodactyla	R_66	2006	Producers	MO	Strong	Low	Grazing/herbivory/browsing	Direct	Europe	Yes	Negative
Muntiacus_reevesi	Cervidae	Cetartiodactyla	R_66	2006	Producers	MN	Weak	Low	Grazing/herbivory/browsing	Direct	Europe	Yes	Negative
Muntiacus_reevesi	Cervidae	Cetartiodactyla	R_66	2006	Producers	MN	Weak	Low	Grazing/herbivory/browsing	Direct	Europe	Yes	Negative
Muntiacus_reevesi	Cervidae	Cetartiodactyla	R_66	2006	Producers	MN	Weak	Low	Grazing/herbivory/browsing	Direct	Europe	Yes	Negative
Muntiacus_reevesi	Cervidae	Cetartiodactyla	R_67	1997	Producers	MN	Weak	Medium	Grazing/herbivory/browsing	Direct	Europe	Yes	Negative
Bubalus_bubalis	Bovidae	Cetartiodactyla	R_68	1996	Primary_consumers	MC	Weak	Medium	Chemical, physical or structural impact on ecosystems	Indirect	Oceania	No	Negative
Bubalus_bubalis	Bovidae	Cetartiodactyla	R_68	1996	Secondary_consumers	MC	Weak	Medium	Chemical, physical or structural impact on ecosystems	Indirect	Oceania	No	Positive
Muntiacus_reevesi	Cervidae	Cetartiodactyla	R_69	1998	Producers	MO	Strong	Medium	(10) Indirect impacts through interactions with other taxa	Indirect	Europe	Yes	Positive
Muntiacus_reevesi	Cervidae	Cetartiodactyla	R_69	1998	Producers	MR	Strong	Medium	(10) Indirect impacts through interactions with other taxa	Indirect	Europe	Yes	Positive
Muntiacus_reevesi	Cervidae	Cetartiodactyla	R_69	1998	Producers	MO	Strong	Medium	(10) Indirect impacts through interactions with other taxa	Indirect	Europe	Yes	Positive
Muntiacus_reevesi	Cervidae	Cetartiodactyla	R_69	1998	Producers	MR	Strong	Medium	(10) Indirect impacts through interactions with other taxa	Indirect	Europe	Yes	Positive
Muntiacus_reevesi	Cervidae	Cetartiodactyla	R_69	1998	Producers	MO	Strong	Medium	(10) Indirect impacts through interactions with other taxa	Indirect	Europe	Yes	Positive
Muntiacus_reevesi	Cervidae	Cetartiodactyla	R_69	1998	Producers	MO	Strong	Low	(10) Indirect impacts through interactions with other taxa	Indirect	Europe	Yes	Positive
Muntiacus_reevesi	Cervidae	Cetartiodactyla	R_69	1998	Producers	MO	Strong	Low	(10) Indirect impacts through interactions with other taxa	Indirect	Europe	Yes	Positive
Lama_guanicoe	Camelidae	Cetartiodactyla	R_7	1994	Producers	MN	Weak	Low	Grazing/herbivory/browsing	Direct	South America	Yes	Negative
Cervus_nippon	Cervidae	Cetartiodactyla	R_70	1981	Producers	MO	Strong	Medium	Grazing/herbivory/browsing	Direct	Europe	Yes	Negative
Cervus_nippon	Cervidae	Cetartiodactyla	R_70	1981	Producers	MO	Strong	Medium	Grazing/herbivory/browsing	Direct	Europe	Yes	Negative
Cervus_nippon	Cervidae	Cetartiodactyla	R_70	1981	Producers	MN	Weak	Medium	Grazing/herbivory/browsing	Direct	Europe	Yes	Negative
Hemitragus_jemlahicus	Bovidae	Cetartiodactyla	R_71	2017	Producers	MO	Strong	Medium	Grazing/herbivory/browsing	Direct	Oceania	Yes	Negative
Hemitragus_jemlahicus	Bovidae	Cetartiodactyla	R_71	2017	Producers	MO	Strong	Medium	Grazing/herbivory/browsing	Direct	Oceania	Yes	Negative
Hemitragus_jemlahicus	Bovidae	Cetartiodactyla	R_71	2017	Producers	MO	Strong	Medium	Grazing/herbivory/browsing	Direct	Oceania	Yes	Negative
Hemitragus_jemlahicus	Bovidae	Cetartiodactyla	R_71	2017	Producers	MO	Strong	Medium	Grazing/herbivory/browsing	Direct	Oceania	Yes	Negative
Hemitragus_jemlahicus	Bovidae	Cetartiodactyla	R_71	2017	Producers	MO	Strong	Medium	Grazing/herbivory/browsing	Direct	Oceania	Yes	Negative
Capra_hircus	Bovidae	Cetartiodactyla	R_72	1987	Secondary_consumers	MN	Weak	Low	Direct physical disturbance	Direct	South America	Yes	Negative
Sus_scrofa	Suidae	Cetartiodactyla	R_72	1987	Secondary_consumers	MO	Strong	Medium	Predation; Direct physical disturbance	Direct	South America	Yes	Negative
Sus_scrofa	Suidae	Cetartiodactyla	R_73	2012	Producers	MN	Weak	Low	Direct physical disturbance	Direct	South America	No	Negative
Sus_scrofa	Suidae	Cetartiodactyla	R_73	2012	Producers	MN	Weak	Low	Direct physical disturbance	Direct	South America	No	Negative
Sus_scrofa	Suidae	Cetartiodactyla	R_73	2012	Producers	MN	Weak	Low	Direct physical disturbance	Direct	South America	No	Negative
Sus_scrofa	Suidae	Cetartiodactyla	R_73	2012	Producers	MN	Weak	Low	Direct physical disturbance	Direct	South America	No	Negative
Sus_scrofa	Suidae	Cetartiodactyla	R_73	2012	Producers	MN	Weak	Low	Direct physical disturbance	Direct	South America	No	Negative
Sus_scrofa	Suidae	Cetartiodactyla	R_73	2012	Producers	MN	Weak	Low	Direct physical disturbance	Direct	South America	No	Negative
Sus_scrofa	Suidae	Cetartiodactyla	R_73	2012	Producers	MN	Weak	Low	Direct physical disturbance	Direct	South America	No	Negative
Sus_scrofa	Suidae	Cetartiodactyla	R_73	2012	Producers	MN	Weak	Low	Direct physical disturbance	Direct	South America	No	Negative
Sus_scrofa	Suidae	Cetartiodactyla	R_73	2012	Producers	MN	Weak	Low	Direct physical disturbance	Direct	South America	No	Negative
Sus_scrofa	Suidae	Cetartiodactyla	R_73	2012	Producers	MN	Weak	Low	Direct physical disturbance	Direct	South America	No	Negative
Sus_scrofa	Suidae	Cetartiodactyla	R_73	2012	Producers	MN	Weak	Low	Direct physical disturbance	Direct	South America	No	Negative
Sus_scrofa	Suidae	Cetartiodactyla	R_73	2012	Producers	MN	Weak	Low	Direct physical disturbance	Direct	South America	No	Negative
Sus_scrofa	Suidae	Cetartiodactyla	R_73	2012	Producers	MN	Weak	Low	Direct physical disturbance	Direct	South America	No	Negative
Sus_scrofa	Suidae	Cetartiodactyla	R_73	2012	Producers	MN	Weak	Low	Direct physical disturbance	Direct	South America	No	Negative
Sus_scrofa	Suidae	Cetartiodactyla	R_73	2012	Producers	MN	Weak	Low	Direct physical disturbance	Direct	South America	No	Negative
Sus_scrofa	Suidae	Cetartiodactyla	R_73	2012	Producers	MN	Weak	Low	(8) Physical impact on ecosystem	Indirect	South_America	No	Positive
Sus_scrofa	Suidae	Cetartiodactyla	R_74	2010	Producers	MN	Weak	Low	Direct physical disturbance	Direct	South America	No	Negative
Sus_scrofa	Suidae	Cetartiodactyla	R_76	2004	Producers	MC	Weak	Medium	Direct physical disturbance	Direct	North and Central America	No	Negative
Sus_scrofa	Suidae	Cetartiodactyla	R_76	2004	Producers	MC	Weak	Medium	Direct physical disturbance	Direct	North and Central America	No	Negative
Equus_caballus	Equidae	Perissodactyla	R_77	2014	Producers	MO	Strong	Medium	Direct physical disturbance	Direct	North and Central America	No	Negative
Equus_caballus	Equidae	Perissodactyla	R_77	2014	Producers	MC	Weak	High	(10) Indirect impacts through interactions with other taxa	Indirect	North_and_Central_America	No	Positive
Equus_caballus	Equidae	Perissodactyla	R_77	2014	Producers	MC	Weak	High	(10) Indirect impacts through interactions with other taxa	Indirect	North_and_Central_America	No	Positive
Equus_caballus	Equidae	Perissodactyla	R_77	2014	Producers	MC	Weak	High	(10) Indirect impacts through interactions with other taxa	Indirect	North_and_Central_America	No	Positive
Equus_caballus	Equidae	Perissodactyla	R_77	2014	Producers	MC	Weak	High	(10) Indirect impacts through interactions with other taxa	Indirect	North_and_Central_America	No	Positive
Axis_porcinus	Cervidae	Cetartiodactyla	R_78	2010	Producers	MN	Weak	Medium	(5) Dispersal facilitation	Direct	Oceania	No	Positive
Axis_porcinus	Cervidae	Cetartiodactyla	R_78	2010	Producers	MN	Weak	Medium	(5) Dispersal facilitation	Direct	Oceania	No	Positive
Axis_porcinus	Cervidae	Cetartiodactyla	R_78	2010	Producers	MN	Weak	Low	(5) Dispersal facilitation	Direct	Oceania	No	Positive
Axis_porcinus	Cervidae	Cetartiodactyla	R_78	2010	Producers	MN	Weak	Medium	(5) Dispersal facilitation	Direct	Oceania	No	Positive
Axis_porcinus	Cervidae	Cetartiodactyla	R_78	2010	Producers	MN	Weak	Medium	(5) Dispersal facilitation	Direct	Oceania	No	Positive
Capra_hircus	Bovidae	Cetartiodactyla	R_79	2003	Producers	MO	Strong	Low	Grazing/herbivory/browsing	Direct	North and Central America	Yes	Negative
Capra_hircus	Bovidae	Cetartiodactyla	R_79	2003	Producers	MO	Strong	Low	Grazing/herbivory/browsing	Direct	North and Central America	Yes	Negative
Capra_hircus	Bovidae	Cetartiodactyla	R_79	2003	Producers	MO	Strong	Low	Grazing/herbivory/browsing	Direct	North and Central America	Yes	Negative
Capra_hircus	Bovidae	Cetartiodactyla	R_79	2003	Producers	MN	Weak	Low	Grazing/herbivory/browsing	Direct	North and Central America	Yes	Negative
Cervus_nippon	Cervidae	Cetartiodactyla	R_8	1981	Primary_consumers	MN	Weak	Low	Competition	Indirect	North and Central America	No	Negative
Equus_caballus	Equidae	Perissodactyla	R_81	2004	Producers	MO	Strong	Medium	Grazing/herbivory/browsing	Direct	North and Central America	Yes	Negative
Equus_caballus	Equidae	Perissodactyla	R_82	2010	Producers	MO	Strong	Low	Grazing/herbivory/browsing	Direct	South America	No	Negative
Equus_caballus	Equidae	Perissodactyla	R_82	2010	Producers	MO	Strong	Low	Grazing/herbivory/browsing	Direct	South America	No	Negative
Equus_caballus	Equidae	Perissodactyla	R_82	2010	Producers	MO	Strong	Low	Grazing/herbivory/browsing	Direct	South America	No	Negative
Equus_caballus	Equidae	Perissodactyla	R_82	2010	Producers	MO	Strong	Low	Grazing/herbivory/browsing	Direct	South America	No	Negative
Equus_caballus	Equidae	Perissodactyla	R_82	2010	Producers	MO	Strong	Low	Grazing/herbivory/browsing	Direct	South America	No	Negative
Cervus_nippon	Cervidae	Cetartiodactyla	R_83	1968	Primary_consumers	MN	Weak	Medium	Hybridisation	Direct	Europe	Yes	Negative
Cervus_nippon	Cervidae	Cetartiodactyla	R_84	2013	Primary_consumers	MC	Weak	Low	Transmission of diseases	Indirect	Europe	No	Negative
Capra_hircus	Bovidae	Cetartiodactyla	R_85	2006	Producers	MO	Strong	Low	Grazing/herbivory/browsing	Direct	South America	Yes	Negative
Capra_hircus	Bovidae	Cetartiodactyla	R_85	2006	Producers	MO	Strong	Low	Grazing/herbivory/browsing	Direct	South America	Yes	Negative
Capra_hircus	Bovidae	Cetartiodactyla	R_85	2006	Producers	MO	Strong	Low	Grazing/herbivory/browsing	Direct	South America	Yes	Negative
Capra_hircus	Bovidae	Cetartiodactyla	R_85	2006	Producers	MO	Strong	Low	Grazing/herbivory/browsing	Direct	South America	Yes	Negative
Capra_hircus	Bovidae	Cetartiodactyla	R_85	2006	Producers	MO	Strong	Low	Grazing/herbivory/browsing	Direct	South America	Yes	Negative
Capra_hircus	Bovidae	Cetartiodactyla	R_86	1999	Producers	MN	Weak	Low	Grazing/herbivory/browsing	Direct	South America	Yes	Negative
Cervus_nippon	Cervidae	Cetartiodactyla	R_87	2005	Producers	MO	Strong	Medium	Grazing/herbivory/browsing	Direct	Europe	Yes	Negative
Cervus_nippon	Cervidae	Cetartiodactyla	R_87	2005	Producers	MO	Strong	High	(10) Indirect impacts through interactions with other taxa	Indirect	Europe	Yes	Positive
Cervus_nippon	Cervidae	Cetartiodactyla	R_87	2005	Primary_consumers	MO	Strong	High	(10) Indirect impacts through interactions with other taxa	Indirect	Europe	Yes	Positive
Cervus_nippon	Cervidae	Cetartiodactyla	R_87	2005	Primary_consumers	MO	Strong	High	(10) Indirect impacts through interactions with other taxa	Indirect	Europe	Yes	Positive
Cervus_nippon	Cervidae	Cetartiodactyla	R_87	2005	Secondary_consumers	MO	Strong	Low	(10) Indirect impacts through interactions with other taxa	Indirect	Europe	Yes	Positive
Capra_hircus	Bovidae	Cetartiodactyla	R_88	2007	Secondary_consumers	MO	Strong	Low	Chemical, physical or structural impact on ecosystems	Indirect	South America	Yes	Negative
Sus_scrofa	Suidae	Cetartiodactyla	R_88	2007	Secondary_consumers	MO	Strong	Low	Predation	Direct	South America	Yes	Negative
Camelus_dromedarius	Camelidae	Cetartiodactyla	R_89	2003	Producers	MN	Weak	Low	Grazing/herbivory/browsing	Direct	Oceania	No	Negative
Camelus_dromedarius	Camelidae	Cetartiodactyla	R_89	2003	Producers	MN	Weak	Low	Grazing/herbivory/browsing	Direct	Oceania	No	Negative
Camelus_dromedarius	Camelidae	Cetartiodactyla	R_89	2003	Producers	MN	Weak	Low	Grazing/herbivory/browsing	Direct	Oceania	No	Negative
Camelus_dromedarius	Camelidae	Cetartiodactyla	R_89	2003	Producers	MN	Weak	Low	Grazing/herbivory/browsing	Direct	Oceania	No	Negative
Camelus_dromedarius	Camelidae	Cetartiodactyla	R_89	2003	Producers	MN	Weak	Medium	(2) Overcompensation	Direct	Oceania	No	Positive
Camelus_dromedarius	Camelidae	Cetartiodactyla	R_89	2003	Producers	MN	Weak	Medium	(2) Overcompensation	Direct	Oceania	No	Positive
Camelus_dromedarius	Camelidae	Cetartiodactyla	R_89	2003	Producers	MN	Weak	Medium	(2) Overcompensation	Direct	Oceania	No	Positive
Camelus_dromedarius	Camelidae	Cetartiodactyla	R_89	2003	Producers	MN	Weak	Medium	(2) Overcompensation	Direct	Oceania	No	Positive
Camelus_dromedarius	Camelidae	Cetartiodactyla	R_89	2003	Producers	MN	Weak	Medium	(2) Overcompensation	Direct	Oceania	No	Positive
Sus_scrofa	Suidae	Cetartiodactyla	R_9	1999	Producers	MN	Weak	Medium	Direct physical disturbance	Direct	North and Central America	No	Negative
Sus_scrofa	Suidae	Cetartiodactyla	R_9	1999	Producers	MN	Weak	Medium	Direct physical disturbance	Direct	North and Central America	No	Negative
Sus_scrofa	Suidae	Cetartiodactyla	R_9	1999	Producers	MN	Weak	Medium	Direct physical disturbance	Direct	North and Central America	No	Negative
Sus_scrofa	Suidae	Cetartiodactyla	R_9	1999	Producers	MN	Weak	Medium	Direct physical disturbance	Direct	North and Central America	No	Negative
Equus_asinus	Equidae	Perissodactyla	R_90	1977	Producers	MN	Weak	Low	Grazing/herbivory/browsing	Direct	South America	No	Negative
Equus_asinus	Equidae	Perissodactyla	R_90	1977	Producers	MN	Weak	Low	Grazing/herbivory/browsing	Direct	South America	No	Negative
Equus_asinus	Equidae	Perissodactyla	R_90	1977	Producers	MN	Weak	Low	Grazing/herbivory/browsing	Direct	South America	No	Negative
Equus_asinus	Equidae	Perissodactyla	R_90	1977	Producers	MN	Weak	Low	Grazing/herbivory/browsing	Direct	South America	No	Negative
Sus_scrofa	Suidae	Cetartiodactyla	R_91	2009	Producers	MN	Weak	Low	Direct physical disturbance	Direct	Oceania	No	Negative
Sus_scrofa	Suidae	Cetartiodactyla	R_91	2009	Producers	MN	Weak	Low	Direct physical disturbance	Direct	Oceania	No	Negative
Equus_caballus	Equidae	Perissodactyla	R_92	1990	Producers	MN	Weak	Low	Direct physical disturbance	Direct	Oceania	No	Negative
Equus_caballus	Equidae	Perissodactyla	R_92	1990	Producers	MN	Weak	Low	Direct physical disturbance	Direct	Oceania	No	Negative
Equus_caballus	Equidae	Perissodactyla	R_92	1990	Producers	MN	Weak	Low	Direct physical disturbance	Direct	Oceania	No	Negative
Equus_caballus	Equidae	Perissodactyla	R_92	1990	Producers	MN	Weak	Low	Direct physical disturbance	Direct	Oceania	No	Negative
Equus_caballus	Equidae	Perissodactyla	R_92	1990	Producers	MN	Weak	Low	Direct physical disturbance	Direct	Oceania	No	Negative
Equus_caballus	Equidae	Perissodactyla	R_92	1990	Producers	MN	Weak	Low	Direct physical disturbance	Direct	Oceania	No	Negative
Equus_caballus	Equidae	Perissodactyla	R_92	1990	Producers	MN	Weak	Low	Direct physical disturbance	Direct	Oceania	No	Negative
Equus_caballus	Equidae	Perissodactyla	R_92	1990	Producers	MN	Weak	Low	Direct physical disturbance	Direct	Oceania	No	Negative
Equus_caballus	Equidae	Perissodactyla	R_92	1990	Producers	MN	Weak	Low	Direct physical disturbance	Direct	Oceania	No	Negative
Equus_caballus	Equidae	Perissodactyla	R_92	1990	Producers	MN	Weak	Low	Direct physical disturbance	Direct	Oceania	No	Negative
Equus_caballus	Equidae	Perissodactyla	R_92	1990	Producers	MN	Weak	Low	Direct physical disturbance	Direct	Oceania	No	Negative
Equus_caballus	Equidae	Perissodactyla	R_92	1990	Producers	MN	Weak	Low	Direct physical disturbance	Direct	Oceania	No	Negative
Equus_caballus	Equidae	Perissodactyla	R_92	1990	Producers	MN	Weak	Low	Direct physical disturbance	Direct	Oceania	No	Negative
Equus_caballus	Equidae	Perissodactyla	R_92	1990	Producers	MN	Weak	Low	Direct physical disturbance	Direct	Oceania	No	Negative
Equus_caballus	Equidae	Perissodactyla	R_92	1990	Producers	MN	Weak	Low	Direct physical disturbance	Direct	Oceania	No	Negative
Equus_caballus	Equidae	Perissodactyla	R_92	1990	Producers	MO	Strong	High	(6) Epibiosis or other direct provisions of habitat	Direct	Oceania	No	Positive
Equus_caballus	Equidae	Perissodactyla	R_92	1990	Producers	MO	Strong	High	(6) Epibiosis or other direct provisions of habitat	Direct	Oceania	No	Positive
Sus_scrofa	Suidae	Cetartiodactyla	R_93	2016	Secondary_consumers	MN	Weak	Medium	Predation	Direct	North and Central America	Yes	Negative
Muntiacus_reevesi	Cervidae	Cetartiodactyla	R_94	2007	Producers	MN	Weak	Low	(5) Dispersal facilitation	Direct	Europe	Yes	Positive
Muntiacus_reevesi	Cervidae	Cetartiodactyla	R_94	2007	Producers	MN	Weak	Low	(5) Dispersal facilitation	Direct	Europe	Yes	Positive
Muntiacus_reevesi	Cervidae	Cetartiodactyla	R_94	2007	Producers	MN	Weak	Low	(5) Dispersal facilitation	Direct	Europe	Yes	Positive
Equus_caballus	Equidae	Perissodactyla	R_95	1999	Producers	MN	Weak	Low	Grazing/herbivory/browsing	Direct	North and Central America	No	Negative
Equus_caballus	Equidae	Perissodactyla	R_95	1999	Producers	MN	Weak	Low	(10) Indirect impacts through interactions with other taxa	Indirect	North_and_Central_America	No	Positive
Equus_caballus	Equidae	Perissodactyla	R_95	1999	Producers	MN	Weak	Medium	(10) Indirect impacts through interactions with other taxa	Indirect	North_and_Central_America	No	Positive
Equus_caballus	Equidae	Perissodactyla	R_95	1999	Producers	MN	Weak	Low	(10) Indirect impacts through interactions with other taxa	Indirect	North_and_Central_America	No	Positive
[truncated: 22 more rows]

## Sheet: EICAT+ assessment data
Alien species scientific name	Alien species common name	Family	Order	Report describing the impact observation (two (or more) references are given when studies are complementary and have been combined into one impact observation)	R_ID	Year of the report	Quotation from the report: rationale for the assigned magnitude (two (or more) quotations are given when studies are complementary and have been combined into one impact observation)	Impact mechanism(s)	Impact sub-mechanism(s)	Mechanism type(s) (direct vs indirect)	Impacted native species scientific name	Impacted native species common name	Impacted kindgom(s)	Impacted trophic level	EICAT+ impact magnitude	Confidence score	Rationale for confidence score: Likelihood of the impact to be higher	Rationale of the confidence score: Likelihood of the impact to be lower	Precise location(s) of impact (island, national Park, wood, etc. given in the report)	Region of impact (district, County, State, Provincia, Archipelago, Departments, etc. of the precise location of impact)	Country of impact	Subcontinent	Continent	Island
Ammotragus lervia	Barabary sheep	Bovidae	Cetartiodactyla	Fernández-Olalla, M., Martínez-Jauregui, M., Perea, R., Velamazán, M. & San Miguel, A. (2016). Threat or opportunity? Browsing preferences and potential impact of Ammotragus lervia on woody plants of a Mediterranean protected area. Journal of Arid Environments, 129, 9–15.	R_97	2016	Abundant species with a high preference index, such as Lithodora fruticosa, Staehelina dubia, Rosmarinus officinalis or Quercus rotundifolia, showed sustainable browsing levels	(2) Overcompensation	(2.4) -to grazing/herbivory/browsing	Direct	Lithodora fruticosa	Shrubby gromwell	Plantae	Primary producers	DD - Data deficient				Sierra Espuna Regional Park	southeastern Spain	Spain	Europe	Europe	No
Ammotragus lervia	Barabary sheep	Bovidae	Cetartiodactyla	Fernández-Olalla, M., Martínez-Jauregui, M., Perea, R., Velamazán, M. & San Miguel, A. (2016). Threat or opportunity? Browsing preferences and potential impact of Ammotragus lervia on woody plants of a Mediterranean protected area. Journal of Arid Environments, 129, 9–15.	R_97	2016	Abundant species with a high preference index, such as Lithodora fruticosa, Staehelina dubia, Rosmarinus officinalis or Quercus rotundifolia, showed sustainable browsing levels	(2) Overcompensation	(2.4) -to grazing/herbivory/browsing	Direct	Staehelina dubia	NA	Plantae	Primary producers	DD - Data deficient				Sierra Espuna Regional Park	southeastern Spain	Spain	Europe	Europe	No
Ammotragus lervia	Barabary sheep	Bovidae	Cetartiodactyla	Fernández-Olalla, M., Martínez-Jauregui, M., Perea, R., Velamazán, M. & San Miguel, A. (2016). Threat or opportunity? Browsing preferences and potential impact of Ammotragus lervia on woody plants of a Mediterranean protected area. Journal of Arid Environments, 129, 9–15.	R_97	2016	Abundant species with a high preference index, such as Lithodora fruticosa, Staehelina dubia, Rosmarinus officinalis or Quercus rotundifolia, showed sustainable browsing levels	(2) Overcompensation	(2.4) -to grazing/herbivory/browsing	Direct	Rosmarinus officinalis	Rosemary	Plantae	Primary producers	DD - Data deficient				Sierra Espuna Regional Park	southeastern Spain	Spain	Europe	Europe	No
Ammotragus lervia	Barabary sheep	Bovidae	Cetartiodactyla	Fernández-Olalla, M., Martínez-Jauregui, M., Perea, R., Velamazán, M. & San Miguel, A. (2016). Threat or opportunity? Browsing preferences and potential impact of Ammotragus lervia on woody plants of a Mediterranean protected area. Journal of Arid Environments, 129, 9–15.	R_97	2016	Abundant species with a high preference index, such as Lithodora fruticosa, Staehelina dubia, Rosmarinus officinalis or Quercus rotundifolia, showed sustainable browsing levels	(2) Overcompensation	(2.4) -to grazing/herbivory/browsing	Direct	Quercus rotundifolia	Holm oak	Plantae	Primary producers	DD - Data deficient				Sierra Espuna Regional Park	southeastern Spain	Spain	Europe	Europe	No
Ammotragus lervia	Barabary sheep	Bovidae	Cetartiodactyla	Fernández-Olalla, M., Martínez-Jauregui, M., Perea, R., Velamazán, M. & San Miguel, A. (2016). Threat or opportunity? Browsing preferences and potential impact of Ammotragus lervia on woody plants of a Mediterranean protected area. Journal of Arid Environments, 129, 9–15.	R_97	2016	Olea europaea, which is a highly preferred species for many wild and domestic ungulates, showed sustainable browsing,	(2) Overcompensation	(2.4) -to grazing/herbivory/browsing	Direct	Olea europaea	Olive	Plantae	Primary producers	DD - Data deficient				Sierra Espuna Regional Park	southeastern Spain	Spain	Europe	Europe	No
Ammotragus lervia	Barabary sheep	Bovidae	Cetartiodactyla	Fernández-Olalla, M., Martínez-Jauregui, M., Perea, R., Velamazán, M. & San Miguel, A. (2016). Threat or opportunity? Browsing preferences and potential impact of Ammotragus lervia on woody plants of a Mediterranean protected area. Journal of Arid Environments, 129, 9–15.	R_97	2016	The most endangered one, Fumana fontanesii, a small shrub, might be endangered by aoudad trampling. However, unpublished evidence suggests that it might also be favored, through endozoochorous dispersal by the aoudad.	(5) Dispersal facilitation	(5.2) -through mutualism	Direct	Fumana fontanesii	NA	Plantae	Primary producers	DD - Data deficient				Sierra Espuna Regional Park	southeastern Spain	Spain	Europe	Europe	No
Axis axis	Chital (spotted deer)	Cervidae	Cetartiodactyla	Mohanty, N. (2013). Evaluating the impact of introduced spotted deer (Axis axis) on forest floor herpetofauna of the Andaman Islands.	R_198	2013	The objectives of this study were to evaluate the effect of chital on the forest floor herpetofaunal abundance and to determine the pathway of interaction between them. [...] . Although, it was not clear if any of the observed species was benefitted in the presence of chital, the semi-arboreal Coryphophylax subcristatus appeared to be affected. [...] Seven species of reptiles were observed in 31 …	(10) Indirect impacts through interactions with other taxa	(10.2) -with other native taxa negatively affecting native taxa	Indirect	Coryphophylax subcristatus	Short-crested bay island forest lizard	Animalia	Tertiary consumers	MO+ - Moderate	Medium	It is unlikely that the alien caused a transient increase in the deer area because the native species is already present in the deer-free area.	The impact might be lower because of confounding effects	Andaman Islands	Andaman and Nicobar Archipelago in the Bay of Bengal	India	South and Southeast Asia	Asia	Yes
Axis axis	Chital (spotted deer)	Cervidae	Cetartiodactyla	Mohanty, N. P., Harikrishnan, S., Sivakumar, K. & Vasudevan, K. Impact of invasive spotted deer (Axis axis) on tropical island lizard communities in the Andaman archipelago. Biol. Invasions 18, 9–15 (2016).	R_199	2016	In this study, we investigated possible indirect pathways of interactions between herbivores and reptiles (Janzen 1976), and hypothesised that herbivory by spotted deer in the Andaman Islands would reduce vegetative cover and/or depress folivorous arthropod abundance. [...] We considered an island as the experimental unit and sampled for lizard abundance, intensity of deer use, arthropod abundanc…	Chemical, physical or structural impact on ecosystems		Indirect	Arthropods	NA	Animalia	NA	ML+ - Minimal	Medium	The alien might affect the performance of native individuals (no decline in the native population size was detected in the study, but the effect of the alien on the performance of native individuals was not investigated).		Alexandra Island, Rutland Island, Hobday Island, Redskin Island, Boat Island, Tarmugli Island, Snob Island, North Cinque Island, South Cinque Island, Bennet Island, Anderson Island, North Andaman Island, South Andaman Island	Andaman islands	India	South and Southeast Asia	Asia	Yes
Axis axis	Chital (spotted deer)	Cervidae	Cetartiodactyla	Veblen, T.T., Mermoz, M., Martin, C. & Ramilo, E. (1989). Effects of Exotic Deer on Forest Regeneration and Composition in Northern Patagonia. Journal of Applied Ecology, 26, 711–724.	R_293	1989	The first documented introduction of red deer (Cervus elaphus) to northern Patagonia occurred between 1917 and 1922 in Neuquen Province […] On Isla Victoria, the percentage frequency of deer pellets in understorey quadrats at sites VI, V2, and V3 was 36-7, 71 4, and 65 3, respectively. On Peninsula Quetrihue no deer pellets were recorded in understorey quadrats, nor were any observed during wider…	(10) Indirect impacts through interactions with other taxa	(10.2) -with other native taxa negatively affecting native taxa	Indirect	Schinus patagonicus	NA	Plantae	Primary producers	MO+ - Moderate	High	It is unlikely that the alien caused a transient increase in the deer area because the native species is already present in the deer-free area.	It is unlikely that the impact would be lower, because a higher frequency of the native have been notted on deer area compare to deer-free area	Isla victoria (Nahuel Huapi National Park)	Neuquén	Argentina	South America	South America	Yes
Axis axis	Chital (spotted deer)	Cervidae	Cetartiodactyla	Veblen, T.T., Mermoz, M., Martin, C. & Ramilo, E. (1989). Effects of Exotic Deer on Forest Regeneration and Composition in Northern Patagonia. Journal of Applied Ecology, 26, 711–724.	R_293	1989	The first documented introduction of red deer (Cervus elaphus) to northern Patagonia occurred between 1917 and 1922 in Neuquen Province […] On Isla Victoria, the percentage frequency of deer pellets in understorey quadrats at sites VI, V2, and V3 was 36-7, 71 4, and 65 3, respectively. On Peninsula Quetrihue no deer pellets were recorded in understorey quadrats, nor were any observed during wider…	(10) Indirect impacts through interactions with other taxa	(10.2) -with other native taxa negatively affecting native taxa	Indirect	Berberis darwinii	NA	Plantae	Primary producers	MO+ - Moderate	High	It is unlikely that the alien caused a transient increase in the deer area because the native species is already present in the deer-free area.	It is unlikely that the impact would be lower, because a higher frequency of the native have been notted on deer area compare to deer-free area	Isla victoria (Nahuel Huapi National Park)	Neuquén	Argentina	South America	South America	Yes
Axis axis	Chital (spotted deer)	Cervidae	Cetartiodactyla	Veblen, T.T., Mermoz, M., Martin, C. & Ramilo, E. (1989). Effects of Exotic Deer on Forest Regeneration and Composition in Northern Patagonia. Journal of Applied Ecology, 26, 711–724.	R_293	1989	The first documented introduction of red deer (Cervus elaphus) to northern Patagonia occurred between 1917 and 1922 in Neuquen Province […] On Isla Victoria, the percentage frequency of deer pellets in understorey quadrats at sites VI, V2, and V3 was 36-7, 71 4, and 65 3, respectively. On Peninsula Quetrihue no deer pellets were recorded in understorey quadrats, nor were any observed during wider…	(2) Overcompensation	(2.4) -to grazing/herbivory/browsing	Direct	Unicinia sp.	NA	Plantae	Primary producers	MR+ - Major	Low	The impact might be higher but we are lacking data on the long term to be able to say that the native would be able to stay on the island even with the alien removed	The impact could be lower due to confounding effects	Isla victoria (Nahuel Huapi National Park)	Neuquén	Argentina	South America	South America	Yes
Axis axis	Chital (spotted deer)	Cervidae	Cetartiodactyla	Veblen, T.T., Mermoz, M., Martin, C. & Ramilo, E. (1989). Effects of Exotic Deer on Forest Regeneration and Composition in Northern Patagonia. Journal of Applied Ecology, 26, 711–724.	R_293	1989	The first documented introduction of red deer (Cervus elaphus) to northern Patagonia occurred between 1917 and 1922 in Neuquen Province […] On Isla Victoria, the percentage frequency of deer pellets in understorey quadrats at sites VI, V2, and V3 was 36-7, 71 4, and 65 3, respectively. On Peninsula Quetrihue no deer pellets were recorded in understorey quadrats, nor were any observed during wider…	(7) Chemical impact on ecosystem; (8) Physical impact on ecosystem; (9) Structural impact on ecosystem; (10) Indirect impact through interactions with other taxa; (6) Epibiosis or other direct provision of habitat		Direct; Indirect	Nothofagus dombeyi	Dombey's beech	Plantae	Primary producers	MO+ - Moderate	High	It is unlikely that the alien caused a transient increase in the deer area because the native species is already present in the deer-free area.	It is unlikely lower because the changes observed were significant	Isla victoria (Nahuel Huapi National Park)	Neuquén	Argentina	South America	South America	Yes
Axis axis	Chital (spotted deer)	Cervidae	Cetartiodactyla	Veblen, T.T., Mermoz, M., Martin, C. & Ramilo, E. (1989). Effects of Exotic Deer on Forest Regeneration and Composition in Northern Patagonia. Journal of Applied Ecology, 26, 711–724.	R_293	1989	The first documented introduction of red deer (Cervus elaphus) to northern Patagonia occurred between 1917 and 1922 in Neuquen Province […] On Isla Victoria, the percentage frequency of deer pellets in understorey quadrats at sites VI, V2, and V3 was 36-7, 71 4, and 65 3, respectively. On Peninsula Quetrihue no deer pellets were recorded in understorey quadrats, nor were any observed during wider…	(7) Chemical impact on ecosystem; (8) Physical impact on ecosystem; (9) Structural impact on ecosystem; (10) Indirect impact through interactions with other taxa; (6) Epibiosis or other direct provision of habitat		Direct; Indirect	Maytenus boaria	NA	Plantae	Primary producers	MO+ - Moderate	High	It is unlikely that the alien caused a transient increase in the deer area because the native species is already present in the deer-free area.	It is unlikely lower because the changes observed were significant	Isla victoria (Nahuel Huapi National Park)	Neuquén	Argentina	South America	South America	Yes
Axis axis	Chital (spotted deer)	Cervidae	Cetartiodactyla	Veblen, T.T., Mermoz, M., Martin, C. & Ramilo, E. (1989). Effects of Exotic Deer on Forest Regeneration and Composition in Northern Patagonia. Journal of Applied Ecology, 26, 711–724.	R_293	1989	The first documented introduction of red deer (Cervus elaphus) to northern Patagonia occurred between 1917 and 1922 in Neuquen Province […] On Isla Victoria, the percentage frequency of deer pellets in understorey quadrats at sites VI, V2, and V3 was 36-7, 71 4, and 65 3, respectively. On Peninsula Quetrihue no deer pellets were recorded in understorey quadrats, nor were any observed during wider…	(10) Indirect impacts through interactions with other taxa	(10.2) -with other native taxa negatively affecting native taxa	Indirect	Aristotelia chilensis	Maqui	Plantae	Primary producers	MO+ - Moderate	High	It is unlikely that the alien caused a transient increase in the deer area because the native species is already present in the deer-free area.	It is unlikely lower because the changes observed were significant	Isla victoria (Nahuel Huapi National Park)	Neuquén	Argentina	South America	South America	Yes
Axis porcinus	Indian hog deer	Cervidae	Cetartiodactyla	Davis, N.E., Forsyth, D.M. & Coulson, G. (2010). Facilitative interactions between an exotic mammal and native and exotic plants: hog deer (Axis porcinus) as seed dispersers in south-eastern Australia. Biol Invasions, 12, 1079–1092.	R_78	2010	Endozoochory by exotic mammalian herbivores could modify vegetation composition by facilitating the dispersal and establishment of exotic and native plant species. We examined the potential for endozoochoric dispersal of native and exotic plants by exotic hog deer (Axis porcinus) in south-eastern Australia. [...] Twenty exotic and 22 native species germinated from hog deer faecal pellets and sign…	(5) Dispersal facilitation	(5.2) -through mutualism	Direct	Juncus holoschoenus	NA	Plantae	Primary producers	MN+ - Minor	Medium	The impact might be higher, because the study did not allow to access results at the population level		Wilsons Promontory National Park (WPNP), southeastern Australia: Yanakie Isthmus (388 530 S; 1468 140 E) and Tidal River (398 020 S; 1468 190 E).	south-eastern Australia	Australia	Oceania	Oceania	No
Axis porcinus	Indian hog deer	Cervidae	Cetartiodactyla	Davis, N.E., Forsyth, D.M. & Coulson, G. (2010). Facilitative interactions between an exotic mammal and native and exotic plants: hog deer (Axis porcinus) as seed dispersers in south-eastern Australia. Biol Invasions, 12, 1079–1092.	R_78	2010	Endozoochory by exotic mammalian herbivores could modify vegetation composition by facilitating the dispersal and establishment of exotic and native plant species. We examined the potential for endozoochoric dispersal of native and exotic plants by exotic hog deer (Axis porcinus) in south-eastern Australia. [...] Twenty exotic and 22 native species germinated from hog deer faecal pellets and sign…	(5) Dispersal facilitation	(5.2) -through mutualism	Direct	Ptychomnion aciculare	NA	Plantae	Primary producers	MN+ - Minor	Medium	The impact might be higher, because the study did not allow to access results at the population level		Wilsons Promontory National Park (WPNP), southeastern Australia: Yanakie Isthmus (388 530 S; 1468 140 E) and Tidal River (398 020 S; 1468 190 E).	south-eastern Australia	Australia	Oceania	Oceania	No
Axis porcinus	Indian hog deer	Cervidae	Cetartiodactyla	Davis, N.E., Forsyth, D.M. & Coulson, G. (2010). Facilitative interactions between an exotic mammal and native and exotic plants: hog deer (Axis porcinus) as seed dispersers in south-eastern Australia. Biol Invasions, 12, 1079–1092.	R_78	2010	Endozoochory by exotic mammalian herbivores could modify vegetation composition by facilitating the dispersal and establishment of exotic and native plant species. We examined the potential for endozoochoric dispersal of native and exotic plants by exotic hog deer (Axis porcinus) in south-eastern Australia. [...] Twenty exotic and 22 native species germinated from hog deer faecal pellets and sign…	(5) Dispersal facilitation	(5.2) -through mutualism	Direct	Hypnum cupressiforme var. lacunosum	NA	Plantae	Primary producers	MN+ - Minor	Low	The impact might be higher, because the study did not allow to access results at the population level		Wilsons Promontory National Park (WPNP), southeastern Australia: Yanakie Isthmus (388 530 S; 1468 140 E) and Tidal River (398 020 S; 1468 190 E).	south-eastern Australia	Australia	Oceania	Oceania	No
Axis porcinus	Indian hog deer	Cervidae	Cetartiodactyla	Davis, N.E., Forsyth, D.M. & Coulson, G. (2010). Facilitative interactions between an exotic mammal and native and exotic plants: hog deer (Axis porcinus) as seed dispersers in south-eastern Australia. Biol Invasions, 12, 1079–1092.	R_78	2010	Endozoochory by exotic mammalian herbivores could modify vegetation composition by facilitating the dispersal and establishment of exotic and native plant species. We examined the potential for endozoochoric dispersal of native and exotic plants by exotic hog deer (Axis porcinus) in south-eastern Australia. [...] Twenty exotic and 22 native species germinated from hog deer faecal pellets and sign…	(5) Dispersal facilitation	(5.2) -through mutualism	Direct	Acacia longifolia var. sophorae	Acacia	Plantae	Primary producers	DD - Data deficient				Wilsons Promontory National Park (WPNP), southeastern Australia: Yanakie Isthmus (388 530 S; 1468 140 E) and Tidal River (398 020 S; 1468 190 E).	south-eastern Australia	Australia	Oceania	Oceania	No
Axis porcinus	Indian hog deer	Cervidae	Cetartiodactyla	Davis, N.E., Forsyth, D.M. & Coulson, G. (2010). Facilitative interactions between an exotic mammal and native and exotic plants: hog deer (Axis porcinus) as seed dispersers in south-eastern Australia. Biol Invasions, 12, 1079–1092.	R_78	2010	Endozoochory by exotic mammalian herbivores could modify vegetation composition by facilitating the dispersal and establishment of exotic and native plant species. We examined the potential for endozoochoric dispersal of native and exotic plants by exotic hog deer (Axis porcinus) in south-eastern Australia. [...] Twenty exotic and 22 native species germinated from hog deer faecal pellets and sign…	(5) Dispersal facilitation	(5.2) -through mutualism	Direct	Themeda triandra	Tussock	Plantae	Primary producers	MN+ - Minor	Medium	The impact might be higher, because the study did not allow to access results at the population level		Wilsons Promontory National Park (WPNP), southeastern Australia: Yanakie Isthmus (388 530 S; 1468 140 E) and Tidal River (398 020 S; 1468 190 E).	south-eastern Australia	Australia	Oceania	Oceania	No
Axis porcinus	Indian hog deer	Cervidae	Cetartiodactyla	Davis, N.E., Forsyth, D.M. & Coulson, G. (2010). Facilitative interactions between an exotic mammal and native and exotic plants: hog deer (Axis porcinus) as seed dispersers in south-eastern Australia. Biol Invasions, 12, 1079–1092.	R_78	2010	Endozoochory by exotic mammalian herbivores could modify vegetation composition by facilitating the dispersal and establishment of exotic and native plant species. We examined the potential for endozoochoric dispersal of native and exotic plants by exotic hog deer (Axis porcinus) in south-eastern Australia. [...] Twenty exotic and 22 native species germinated from hog deer faecal pellets and sign…	(5) Dispersal facilitation	(5.2) -through mutualism	Direct	Unidentified grasses	NA	Plantae	Primary producers	MN+ - Minor	Medium	The impact might be higher, because the study did not allow to access results at the population level		Wilsons Promontory National Park (WPNP), southeastern Australia: Yanakie Isthmus (388 530 S; 1468 140 E) and Tidal River (398 020 S; 1468 190 E).	south-eastern Australia	Australia	Oceania	Oceania	No
Axis porcinus	Indian hog deer	Cervidae	Cetartiodactyla	Davis, N.E., Forsyth, D.M. & Coulson, G. (2010). Facilitative interactions between an exotic mammal and native and exotic plants: hog deer (Axis porcinus) as seed dispersers in south-eastern Australia. Biol Invasions, 12, 1079–1092.	R_78	2010	The species that germinated most frequently (i.e., germinated from [20% of pellet samples) were the exotic forb Plantago coronopus, the native rush Juncus holoschoenus, and the two native mosses Ptychomnion aciculare and Hypnum cupressiforme var. lacunosum.	(5) Dispersal facilitation	(5.2) -through mutualism	Direct	Acacia longifolia var. sophorae	Long-leaved wattle	Plantae	Primary producers	DD - Data deficient				Wilsons Promontory National Park (WPNP), southeastern Australia: Yanakie Isthmus (388 530 S; 1468 140 E) and Tidal River (398 020 S; 1468 190 E).	south-eastern Australia	Australia	Oceania	Oceania	No
Bos taurus	Cattle	Bovidae	Cetartiodactyla	Forsyth, D.M., Latham, A.D.M., Davis, N.E., Caley, P., Letnic, M., Moloney, P.D., et al. (2019). Interactions between dingoes and introduced wild ungulates: concepts, evidence and knowledge gaps. Aust. Mammalogy, 41, 12.	R_105	2019	Eleven of the 15 ungulate species were recorded in the diet of dingoes, with the highest %FO occurrences reported for feral goats (73%) and cattle (60%).	(1) Provision of trophic resources	(1.1) -through predation	Direct	Canis dingo	Dingo	Animalia	Apex predators	DD - Data deficient				NA	NA	Australia	Oceania	Oceania	No
Bos taurus	Cattle	Bovidae	Cetartiodactyla	Gordon, I.J. (1988). Facilitation of Red Deer Grazing by Cattle and Its Impact on Red Deer Performance. Journal of Applied Ecology, 25, 1–9.	R_124	1988	(1) Cattle (Bos taurus L.) were removed from the Isle of Rhum, Scotland, in 1957. They were reintroduced into one area of the island in 1970 and graze on areas occupied by red deer (Cervus elaphus L.). [...] (2) Winter use by cattle of pasture dominated by Molinia caerulea (L.) resulted in greater biomass and availability of green grass in the spring than in ungrazed areas. [...] In February 1984…	(2) Overcompensation	(2.4) -to grazing/herbivory/browsing	Direct	Molinia caerulea	Purple moor-grass	Plantae	Primary producers	MN+ - Minor	Medium	The impact might be higher, but the study did not allow to detect the effect of the alien on the native population size (changes in the aboveground standing crop high between grazed and ungrazed plots have been detected, but this does not allow to conclude to a increase in the population size).		Isle of Rhum	Archipelago of Inner Hebrides, Scotland	United Kingdom	Europe	Europe	Yes
Bos taurus	Cattle	Bovidae	Cetartiodactyla	Lambertucci, S.A., Trejo, A., Di Martino, S., Sánchez-Zapata, J.A., Donázar, J.A. & Hiraldo, F. (2009). Spatial and temporal patterns in the diet of the Andean condor: ecological replacement of native fauna by exotic species. Animal Conservation, 12, 338–345.	R_169	2009	We study the spatial and temporal variation of the condors’ diet to determine which species are being consumed by condors, and to test whether native herbivores still have a role as a food source. […] Our study shows that the Andean condor depends heavily (98.5%) on exotic herbivores. Their diet was made up of c. 51% sheep/goat, 24% hare/rabbit, 17% red deer and 6% cow/horse, with only 2% other m…	(1) Provision of trophic resources	(1.1) -through predation	Direct	Vultur gryphus	Andean condos	Animalia	Tertiary consumers	MN+ - Minor	Medium	The impact might be higher, but the study did not allow to determine an impact at the popualtion level	It is unlikely lower because the alien represents 6% (still more than the proportion of native preys) of the food source of the native, although this percentage corresponds to introduced horses and cows.	northwestern Patagonia in the southern tip of South America (in a c. 25 000 km2 between latitude 361–411S and longitude 701–711W	Patagonia	Argentina	South America	South America	No
Bos taurus	Cattle	Bovidae	Cetartiodactyla	Novaro, A.J., Funes, M.C. & Susan Walker, R. (2000). Ecological extinction of native prey of a carnivore assemblage in Argentine Patagonia. Biological Conservation, 92, 25–33.	R_211	2000	The Patagonia region of South America has been severely modiÆed by the introduction of livestock and wild exotic species. We studied diets of culpeo foxes (Pseudalopex culpaeus), chilla foxes (P. griseus), hog-nosed skunks (Conepatus chinga), Georoy's cats (Oncifelis georoyi), and pumas (Puma concolor) between 1989 and 1994, and evaluated prey biomass on rangelands in Neuque¬ n, Argentina. [...…	(1) Provision of trophic resources	(1.1) -through predation	Direct	Puma concolor	Cougar	Animalia	Apex predators	DD - Data deficient				Province of Neuquén	Patagonia	Argentina	South America	South America	No
Bos taurus	Cattle	Bovidae	Cetartiodactyla	Pyke, C.R. & Marty, J. (2005). Cattle Grazing Mediates Climate Change Impacts on Ephemeral Wetlands. Conservation Biology, 19, 1619–1625.	R_238	2005	We evaluated the ecological implications of interactions between grazing and climate change for branchiopods and the California tiger salamander ( Ambystoma californiense)atfour sites spanning a latitudinal climate gradient. Grazing played an important role in maintaining the suitability of vernal pool hydrological conditions for fairy shrimp and salamander reproduction. The ecological importance…	(8) Physical impact on ecosystem		Indirect	Ambystoma californiense	California tiger salamander	Animalia	Secondary consumers	MN+ - Minor	Medium	The impact might be higher, but the study did not allow to detect the effect of the alien on the native population size, only ponding was measured, which does not allow to conclude on a population increase.		Eastern Sacramento County	Eastern Sacramento County, California	United States	North America	North and Central America	No
Bos taurus	Cattle	Bovidae	Cetartiodactyla	Read, J.L. (2002). Experimental trial of Australian arid zone reptiles as early warning indicators of overgrazing by cattle. Austral Ecology, 27, 55–66.	R_242	2002	The value of reptiles as bioindicators of the initial effects of heavy cattle grazing in a South Australian chenopod shrubland was assessed in an experimental trial. […] The only species that responded consistently and significantly to grazing was Ctenophorus nuchalis. The postgrazing increase in C. nuchalis captures was significantly greater (F = 7.38, d.f. 2,108, P = 0.001) in the final period …	(10) Indirect impacts through interactions with other taxa	(10.2) -with other native taxa negatively affecting native taxa	Indirect	Ctenophorus nuchalis.	Reptile, Agamidae	Animalia	Secondary consumers	MO+ - Moderate	High	It is unlikely higher because the native species is also present without cattle	It is unlikely lower cause we observe an increase in the population	Olympic Dam (136°57_x0002_E, 30°26_x0002_S)	South Australia	Australia	Oceania	Oceania	No
Bos taurus	Cattle	Bovidae	Cetartiodactyla	Read, J.L. (2002). Experimental trial of Australian arid zone reptiles as early warning indicators of overgrazing by cattle. Austral Ecology, 27, 55–66.	R_242	2002	The value of reptiles as bioindicators of the initial effects of heavy cattle grazing in a South Australian chenopod shrubland was assessed in an experimental trial. […] The only species that responded consistently and significantly to grazing was Ctenophorus nuchalis. The postgrazing increase in C. nuchalis captures was significantly greater (F = 7.38, d.f. 2,108, P = 0.001) in the final period …	(10) Indirect impacts through interactions with other taxa	(10.2) -with other native taxa negatively affecting native taxa	Indirect	Ctenophorus pictus	Reptile, Agamidae	Animalia	Secondary consumers	MO+ - Moderate	Medium	It is unlikely higher because the native species is also present without cattle	The impact might be lower due to low captures at control sites because of the low sample size	Olympic Dam (136°57_x0002_E, 30°26_x0002_S)	South Australia	Australia	Oceania	Oceania	No
Bos taurus	Cattle	Bovidae	Cetartiodactyla	Sasal, Y., Raffaele, E. & Farji-Brener, A.G. (2015). Consequences of fire and cattle browsing on ground beetles (Coleoptera) in NW Patagonia. Ecol Res, 30, 1015–1023.	R_252	2015	In northwestern Patagonia, the most important disturbances are fire and introduced ungulates. Although these disturbances have been present in this region since late eighteen century, their effects on arthropods diversity have been poorly studied. Here, we examined the short-term response of ground beetles (Coleoptera) to fire (burnt and unburnt) in browsed forests and to cattle browsing (cattle …	(10) Indirect impacts through interactions with other taxa	(10.2) -with other native taxa negatively affecting native taxa	Indirect	Bembiddini sp.	Ground beetle	Animalia	Secondary consumers	MO+ - Moderate	High	It is unlikely higher because the beetle is also present in areas without cattle.	It is unlikely lower cause we observe an increase in the population	Nahuel Huapi National Park	Patagonia	Argentina	South America	South America	No
Bos taurus	Cattle	Bovidae	Cetartiodactyla	Sasal, Y., Raffaele, E. & Farji-Brener, A.G. (2015). Consequences of fire and cattle browsing on ground beetles (Coleoptera) in NW Patagonia. Ecol Res, 30, 1015–1023.	R_252	2015	In northwestern Patagonia, the most important disturbances are fire and introduced ungulates. Although these disturbances have been present in this region since late eighteen century, their effects on arthropods diversity have been poorly studied. Here, we examined the short-term response of ground beetles (Coleoptera) to fire (burnt and unburnt) in browsed forests and to cattle browsing (cattle …	(10) Indirect impacts through interactions with other taxa	(10.2) -with other native taxa negatively affecting native taxa	Indirect	Carabidae sp.	Ground beetle	Animalia	Secondary consumers	MO+ - Moderate	Medium	The impact might be higher in reason of the study design and the fact that beetles are moving (i.e., it's not because they were not in the sampling area at the time of the sampling that they are never in it).	It is unlikely lower cause we observe an increase in the population	Nahuel Huapi National Park	Patagonia	Argentina	South America	South America	No
Bos taurus	Cattle	Bovidae	Cetartiodactyla	Sasal, Y., Raffaele, E. & Farji-Brener, A.G. (2015). Consequences of fire and cattle browsing on ground beetles (Coleoptera) in NW Patagonia. Ecol Res, 30, 1015–1023.	R_252	2015	In northwestern Patagonia, the most important disturbances are fire and introduced ungulates. Although these disturbances have been present in this region since late eighteen century, their effects on arthropods diversity have been poorly studied. Here, we examined the short-term response of ground beetles (Coleoptera) to fire (burnt and unburnt) in browsed forests and to cattle browsing (cattle …	(10) Indirect impacts through interactions with other taxa	(10.2) -with other native taxa negatively affecting native taxa	Indirect	Mimodromites nigrotestaceus	Ground beetle	Animalia	Secondary consumers	MO+ - Moderate	Medium	The impact might be higher in reason of the study design and the fact that beetles are moving (i.e., it's not because they were not in the sampling area at the time of the sampling that they are never in it).	It is unlikely lower cause we observe an increase in the population	Nahuel Huapi National Park	Patagonia	Argentina	South America	South America	No
Bos taurus	Cattle	Bovidae	Cetartiodactyla	Sasal, Y., Raffaele, E. & Farji-Brener, A.G. (2015). Consequences of fire and cattle browsing on ground beetles (Coleoptera) in NW Patagonia. Ecol Res, 30, 1015–1023.	R_252	2015	In northwestern Patagonia, the most important disturbances are fire and introduced ungulates. Although these disturbances have been present in this region since late eighteen century, their effects on arthropods diversity have been poorly studied. Here, we examined the short-term response of ground beetles (Coleoptera) to fire (burnt and unburnt) in browsed forests and to cattle browsing (cattle …	(10) Indirect impacts through interactions with other taxa	(10.2) -with other native taxa negatively affecting native taxa	Indirect	Pelmatellina sp.	Ground beetle	Animalia	Secondary consumers	MO+ - Moderate	Medium	The impact might be higher in reason of the study design and the fact that beetles are moving (i.e., it's not because they were not in the sampling area at the time of the sampling that they are never in it).	It is unlikely lower cause we observe an increase in the population	Nahuel Huapi National Park	Patagonia	Argentina	South America	South America	No
Bos taurus	Cattle	Bovidae	Cetartiodactyla	Sasal, Y., Raffaele, E. & Farji-Brener, A.G. (2015). Consequences of fire and cattle browsing on ground beetles (Coleoptera) in NW Patagonia. Ecol Res, 30, 1015–1023.	R_252	2015	In northwestern Patagonia, the most important disturbances are fire and introduced ungulates. Although these disturbances have been present in this region since late eighteen century, their effects on arthropods diversity have been poorly studied. Here, we examined the short-term response of ground beetles (Coleoptera) to fire (burnt and unburnt) in browsed forests and to cattle browsing (cattle …	(10) Indirect impacts through interactions with other taxa	(10.2) -with other native taxa negatively affecting native taxa	Indirect	Trechini sp.	Ground beetle	Animalia	Secondary consumers	MO+ - Moderate	Medium	The impact might be higher in reason of the study design and the fact that beetles are moving (i.e., it's not because they were not in the sampling area at the time of the sampling that they are never in it).	It is unlikely lower cause we observe an increase in the population	Nahuel Huapi National Park	Patagonia	Argentina	South America	South America	No
Bos taurus	Cattle	Bovidae	Cetartiodactyla	Sasal, Y., Raffaele, E. & Farji-Brener, A.G. (2015). Consequences of fire and cattle browsing on ground beetles (Coleoptera) in NW Patagonia. Ecol Res, 30, 1015–1023.	R_252	2015	In northwestern Patagonia, the most important disturbances are fire and introduced ungulates. Although these disturbances have been present in this region since late eighteen century, their effects on arthropods diversity have been poorly studied. Here, we examined the short-term response of ground beetles (Coleoptera) to fire (burnt and unburnt) in browsed forests and to cattle browsing (cattle …	(10) Indirect impacts through interactions with other taxa	(10.2) -with other native taxa negatively affecting native taxa	Indirect	Trechisibus nigripenis	Ground beetle	Animalia	Secondary consumers	MO+ - Moderate	High	It is unlikely higher because the beetle is also present in areas without cattle.	It is unlikely lower cause we observe an increase in the population	Nahuel Huapi National Park	Patagonia	Argentina	South America	South America	No
Bos taurus	Cattle	Bovidae	Cetartiodactyla	Sasal, Y., Raffaele, E. & Farji-Brener, A.G. (2015). Consequences of fire and cattle browsing on ground beetles (Coleoptera) in NW Patagonia. Ecol Res, 30, 1015–1023.	R_252	2015	In northwestern Patagonia, the most important disturbances are fire and introduced ungulates. Although these disturbances have been present in this region since late eighteen century, their effects on arthropods diversity have been poorly studied. Here, we examined the short-term response of ground beetles (Coleoptera) to fire (burnt and unburnt) in browsed forests and to cattle browsing (cattle …	(10) Indirect impacts through interactions with other taxa	(10.2) -with other native taxa negatively affecting native taxa	Indirect	Lampyridae sp.	Ground beetle	Animalia	Secondary consumers	MO+ - Moderate	Medium	The impact might be higher in reason of the study design and the fact that beetles are moving (i.e., it's not because they were not in the sampling area at the time of the sampling that they are never in it).	It is unlikely lower cause we observe an increase in the population	Nahuel Huapi National Park	Patagonia	Argentina	South America	South America	No
Bos taurus	Cattle	Bovidae	Cetartiodactyla	Sasal, Y., Raffaele, E. & Farji-Brener, A.G. (2015). Consequences of fire and cattle browsing on ground beetles (Coleoptera) in NW Patagonia. Ecol Res, 30, 1015–1023.	R_252	2015	In northwestern Patagonia, the most important disturbances are fire and introduced ungulates. Although these disturbances have been present in this region since late eighteen century, their effects on arthropods diversity have been poorly studied. Here, we examined the short-term response of ground beetles (Coleoptera) to fire (burnt and unburnt) in browsed forests and to cattle browsing (cattle …	(10) Indirect impacts through interactions with other taxa	(10.2) -with other native taxa negatively affecting native taxa	Indirect	Scydmaenidae sp.	Ground beetle	Animalia	Secondary consumers	MO+ - Moderate	Medium	The impact might be higher in reason of the study design and the fact that beetles are moving (i.e., it's not because they were not in the sampling area at the time of the sampling that they are never in it).	It is unlikely lower cause we observe an increase in the population	Nahuel Huapi National Park	Patagonia	Argentina	South America	South America	No
Bos taurus	Cattle	Bovidae	Cetartiodactyla	Sasal, Y., Raffaele, E. & Farji-Brener, A.G. (2015). Consequences of fire and cattle browsing on ground beetles (Coleoptera) in NW Patagonia. Ecol Res, 30, 1015–1023.	R_252	2015	In northwestern Patagonia, the most important disturbances are fire and introduced ungulates. Although these disturbances have been present in this region since late eighteen century, their effects on arthropods diversity have been poorly studied. Here, we examined the short-term response of ground beetles (Coleoptera) to fire (burnt and unburnt) in browsed forests and to cattle browsing (cattle …	(10) Indirect impacts through interactions with other taxa	(10.2) -with other native taxa negatively affecting native taxa	Indirect	Staphylinidae sp.	Ground beetle	Animalia	Secondary consumers	MO+ - Moderate	Medium	The impact might be higher in reason of the study design and the fact that beetles are moving (i.e., it's not because they were not in the sampling area at the time of the sampling that they are never in it).	It is unlikely lower cause we observe an increase in the population	Nahuel Huapi National Park	Patagonia	Argentina	South America	South America	No
Bos taurus	Cattle	Bovidae	Cetartiodactyla	Sasal, Y., Raffaele, E. & Farji-Brener, A.G. (2015). Consequences of fire and cattle browsing on ground beetles (Coleoptera) in NW Patagonia. Ecol Res, 30, 1015–1023.	R_252	2015	In northwestern Patagonia, the most important disturbances are fire and introduced ungulates. Although these disturbances have been present in this region since late eighteen century, their effects on arthropods diversity have been poorly studied. Here, we examined the short-term response of ground beetles (Coleoptera) to fire (burnt and unburnt) in browsed forests and to cattle browsing (cattle …	(10) Indirect impacts through interactions with other taxa	(10.2) -with other native taxa negatively affecting native taxa	Indirect	Systolosoma breve	Ground beetle	Animalia	Secondary consumers	MO+ - Moderate	High	It is unlikely higher because the beetle is also present in areas without cattle.	It is unlikely lower cause we observe an increase in the population	Nahuel Huapi National Park	Patagonia	Argentina	South America	South America	No
Bos taurus	Cattle	Bovidae	Cetartiodactyla	Sasal, Y., Raffaele, E. & Farji-Brener, A.G. (2015). Consequences of fire and cattle browsing on ground beetles (Coleoptera) in NW Patagonia. Ecol Res, 30, 1015–1023.	R_252	2015	In northwestern Patagonia, the most important disturbances are fire and introduced ungulates. Although these disturbances have been present in this region since late eighteen century, their effects on arthropods diversity have been poorly studied. Here, we examined the short-term response of ground beetles (Coleoptera) to fire (burnt and unburnt) in browsed forests and to cattle browsing (cattle …	(10) Indirect impacts through interactions with other taxa	(10.2) -with other native taxa negatively affecting native taxa	Indirect	Conognatha viridiventris	Ground beetle	Animalia	Secondary consumers	MO+ - Moderate	Medium	The impact might be higher in reason of the study design and the fact that beetles are moving (i.e., it's not because they were not in the sampling area at the time of the sampling that they are never in it).	It is unlikely lower cause we observe an increase in the population	Nahuel Huapi National Park	Patagonia	Argentina	South America	South America	No
Bos taurus	Cattle	Bovidae	Cetartiodactyla	Sasal, Y., Raffaele, E. & Farji-Brener, A.G. (2015). Consequences of fire and cattle browsing on ground beetles (Coleoptera) in NW Patagonia. Ecol Res, 30, 1015–1023.	R_252	2015	In northwestern Patagonia, the most important disturbances are fire and introduced ungulates. Although these disturbances have been present in this region since late eighteen century, their effects on arthropods diversity have been poorly studied. Here, we examined the short-term response of ground beetles (Coleoptera) to fire (burnt and unburnt) in browsed forests and to cattle browsing (cattle …	(10) Indirect impacts through interactions with other taxa	(10.2) -with other native taxa negatively affecting native taxa	Indirect	Chrysomelidae sp.	Ground beetle	Animalia	Secondary consumers	MO+ - Moderate	Medium	The impact might be higher in reason of the study design and the fact that beetles are moving (i.e., it's not because they were not in the sampling area at the time of the sampling that they are never in it).	It is unlikely lower cause we observe an increase in the population	Nahuel Huapi National Park	Patagonia	Argentina	South America	South America	No
Bos taurus	Cattle	Bovidae	Cetartiodactyla	Sasal, Y., Raffaele, E. & Farji-Brener, A.G. (2015). Consequences of fire and cattle browsing on ground beetles (Coleoptera) in NW Patagonia. Ecol Res, 30, 1015–1023.	R_252	2015	In northwestern Patagonia, the most important disturbances are fire and introduced ungulates. Although these disturbances have been present in this region since late eighteen century, their effects on arthropods diversity have been poorly studied. Here, we examined the short-term response of ground beetles (Coleoptera) to fire (burnt and unburnt) in browsed forests and to cattle browsing (cattle …	(10) Indirect impacts through interactions with other taxa	(10.2) -with other native taxa negatively affecting native taxa	Indirect	Pycnosiphorus sp.	Ground beetle	Animalia	Secondary consumers	MO+ - Moderate	High	It is unlikely higher because the beetle is also present in areas without cattle.	It is unlikely lower cause we observe an increase in the population	Nahuel Huapi National Park	Patagonia	Argentina	South America	South America	No
Bos taurus	Cattle	Bovidae	Cetartiodactyla	Sasal, Y., Raffaele, E. & Farji-Brener, A.G. (2015). Consequences of fire and cattle browsing on ground beetles (Coleoptera) in NW Patagonia. Ecol Res, 30, 1015–1023.	R_252	2015	In northwestern Patagonia, the most important disturbances are fire and introduced ungulates. Although these disturbances have been present in this region since late eighteen century, their effects on arthropods diversity have been poorly studied. Here, we examined the short-term response of ground beetles (Coleoptera) to fire (burnt and unburnt) in browsed forests and to cattle browsing (cattle …	(10) Indirect impacts through interactions with other taxa	(10.2) -with other native taxa negatively affecting native taxa	Indirect	Scarabaeidae sp.	Ground beetle	Animalia	Secondary consumers	MO+ - Moderate	Medium	The impact might be higher in reason of the study design and the fact that beetles are moving (i.e., it's not because they were not in the sampling area at the time of the sampling that they are never in it).	It is unlikely lower cause we observe an increase in the population	Nahuel Huapi National Park	Patagonia	Argentina	South America	South America	No
Bos taurus	Cattle	Bovidae	Cetartiodactyla	Sasal, Y., Raffaele, E. & Farji-Brener, A.G. (2015). Consequences of fire and cattle browsing on ground beetles (Coleoptera) in NW Patagonia. Ecol Res, 30, 1015–1023.	R_252	2015	In northwestern Patagonia, the most important disturbances are fire and introduced ungulates. Although these disturbances have been present in this region since late eighteen century, their effects on arthropods diversity have been poorly studied. Here, we examined the short-term response of ground beetles (Coleoptera) to fire (burnt and unburnt) in browsed forests and to cattle browsing (cattle …	(10) Indirect impacts through interactions with other taxa	(10.2) -with other native taxa negatively affecting native taxa	Indirect	Colon sp.	Ground beetle	Animalia	Secondary consumers	MO+ - Moderate	Medium	The impact might be higher in reason of the study design and the fact that beetles are moving (i.e., it's not because they were not in the sampling area at the time of the sampling that they are never in it).	It is unlikely lower cause we observe an increase in the population	Nahuel Huapi National Park	Patagonia	Argentina	South America	South America	No
Bos taurus	Cattle	Bovidae	Cetartiodactyla	Sasal, Y., Raffaele, E. & Farji-Brener, A.G. (2015). Consequences of fire and cattle browsing on ground beetles (Coleoptera) in NW Patagonia. Ecol Res, 30, 1015–1023.	R_252	2015	In northwestern Patagonia, the most important disturbances are fire and introduced ungulates. Although these disturbances have been present in this region since late eighteen century, their effects on arthropods diversity have been poorly studied. Here, we examined the short-term response of ground beetles (Coleoptera) to fire (burnt and unburnt) in browsed forests and to cattle browsing (cattle …	(10) Indirect impacts through interactions with other taxa	(10.2) -with other native taxa negatively affecting native taxa	Indirect	Eunemadus chilensis	Ground beetle	Animalia	Secondary consumers	MO+ - Moderate	Medium	The impact might be higher in reason of the study design and the fact that beetles are moving (i.e., it's not because they were not in the sampling area at the time of the sampling that they are never in it).	It is unlikely lower cause we observe an increase in the population	Nahuel Huapi National Park	Patagonia	Argentina	South America	South America	No
Bos taurus	Cattle	Bovidae	Cetartiodactyla	Sasal, Y., Raffaele, E. & Farji-Brener, A.G. (2015). Consequences of fire and cattle browsing on ground beetles (Coleoptera) in NW Patagonia. Ecol Res, 30, 1015–1023.	R_252	2015	In northwestern Patagonia, the most important disturbances are fire and introduced ungulates. Although these disturbances have been present in this region since late eighteen century, their effects on arthropods diversity have been poorly studied. Here, we examined the short-term response of ground beetles (Coleoptera) to fire (burnt and unburnt) in browsed forests and to cattle browsing (cattle …	(10) Indirect impacts through interactions with other taxa	(10.2) -with other native taxa negatively affecting native taxa	Indirect	Leiodidae sp.	Ground beetle	Animalia	Secondary consumers	MO+ - Moderate	Medium	The impact might be higher in reason of the study design and the fact that beetles are moving (i.e., it's not because they were not in the sampling area at the time of the sampling that they are never in it).	It is unlikely lower cause we observe an increase in the population	Nahuel Huapi National Park	Patagonia	Argentina	South America	South America	No
Bos taurus	Cattle	Bovidae	Cetartiodactyla	Sasal, Y., Raffaele, E. & Farji-Brener, A.G. (2015). Consequences of fire and cattle browsing on ground beetles (Coleoptera) in NW Patagonia. Ecol Res, 30, 1015–1023.	R_252	2015	In northwestern Patagonia, the most important disturbances are fire and introduced ungulates. Although these disturbances have been present in this region since late eighteen century, their effects on arthropods diversity have been poorly studied. Here, we examined the short-term response of ground beetles (Coleoptera) to fire (burnt and unburnt) in browsed forests and to cattle browsing (cattle …	(10) Indirect impacts through interactions with other taxa	(10.2) -with other native taxa negatively affecting native taxa	Indirect	Nitidulidae sp.	Ground beetle	Animalia	Secondary consumers	MO+ - Moderate	Medium	The impact might be higher in reason of the study design and the fact that beetles are moving (i.e., it's not because they were not in the sampling area at the time of the sampling that they are never in it).	It is unlikely lower cause we observe an increase in the population	Nahuel Huapi National Park	Patagonia	Argentina	South America	South America	No
Bos taurus	Cattle	Bovidae	Cetartiodactyla	Sasal, Y., Raffaele, E. & Farji-Brener, A.G. (2015). Consequences of fire and cattle browsing on ground beetles (Coleoptera) in NW Patagonia. Ecol Res, 30, 1015–1023.	R_252	2015	In northwestern Patagonia, the most important disturbances are fire and introduced ungulates. Although these disturbances have been present in this region since late eighteen century, their effects on arthropods diversity have been poorly studied. Here, we examined the short-term response of ground beetles (Coleoptera) to fire (burnt and unburnt) in browsed forests and to cattle browsing (cattle …	(10) Indirect impacts through interactions with other taxa	(10.2) -with other native taxa negatively affecting native taxa	Indirect	Zopheridae sp.	Ground beetle	Animalia	Secondary consumers	MO+ - Moderate	High	It is unlikely higher because the beetle is also present in areas without cattle.	It is unlikely lower cause we observe an increase in the population	Nahuel Huapi National Park	Patagonia	Argentina	South America	South America	No
Bos taurus	Cattle	Bovidae	Cetartiodactyla	Zhong, Z., Li, X., Smit, C., Li, T., Wang, L., Aschero, V., et al. (2022). Large herbivores facilitate a dominant grassland forb via multiple indirect effects. Ecology, 103, e3635.	R_315	2022	Here, we integrate medium- and small-scale field experiments to investigate how a large vertebrate herbivore, cattle (Bos taurus), affects the aboveground biomass of a dominant forb species, Artemisia scoparia, via diverse direct and indirect pathways in a temperate grassland in northeast China. Although cattle consumed this forb, its biomass increased significantly in response to grazing, due to…	(10) Indirect impacts through interactions with other taxa	(10.2) -with other native taxa negatively affecting native taxa	Indirect	Artemisia scoparia		Plantae	Primary producers	MO+ - Moderate	High	It is unlikely higher because the native species is also present without cattle	It is unlikely lower cause we observe an increase in the native population	Grassland Ecological Research Station of Northeast Normal University, Jilin Province of Northeast China (44_x000E_35.50 N, 123_x000E_30.50 E)	Jilin Province of Northeast China	China	Eastern Asia	Asia	No
Bos taurus	Cattle	Bovidae	Cetartiodactyla	Zhong, Z., Li, X., Smit, C., Li, T., Wang, L., Aschero, V., et al. (2022). Large herbivores facilitate a dominant grassland forb via multiple indirect effects. Ecology, 103, e3635.	R_315	2022	Effects of cattle grazing on plants, litter, ants and resource availability [...] Cattle increased A. scoparia biomass by 43% (F1,5 = 10.04, p = 0.025, Figure 1a) and stem density by 45% (F1,5 = 27.06, p = 0.003, Figure 1b) after 2 years of grazing (2010–2011). Mean height of A. scoparia was not significantly affected by cattle grazing (F1,5 = 0.97, p = 0.371, Figure 1c). [...] Figure 6 : 4) catt…	(10) Indirect impacts through interactions with other taxa	(10.4) -with other native taxa positively affecting native taxa	Indirect	Artemisia scoparia		Plantae	Primary producers	MO+ - Moderate	High	It is unlikely higher because the native species is also present without cattle	It is unlikely lower cause we observe an increase in the native population	Grassland Ecological Research Station of Northeast Normal University, Jilin Province of Northeast China (44_x000E_35.50 N, 123_x000E_30.50 E)	Jilin Province of Northeast China	China	Eastern Asia	Asia	No
Bos taurus	Cattle	Bovidae	Cetartiodactyla	Zhong, Z., Li, X., Smit, C., Li, T., Wang, L., Aschero, V., et al. (2022). Large herbivores facilitate a dominant grassland forb via multiple indirect effects. Ecology, 103, e3635.	R_315	2022	Effects of cattle grazing on plants, litter, ants and resource availability […] However, grazing significantly reduced litter biomass by 71% (F1,5 = 72.77, p <0.001, Figure 2b) and increased ant nest density by 113% (F1,5 = 23.35, p = 0.005, Figure 2c).	(10) Indirect impacts through interactions with other taxa	(10.2) -with other native taxa negatively affecting native taxa	Indirect	Ants	NA	Animalia	Herbivores	MO+ - Moderate	High	It is unlikely higher because the native species is also present without cattle	It is unlikely lower cause we observe an increase in the native population	Grassland Ecological Research Station of Northeast Normal University, Jilin Province of Northeast China (44_x000E_35.50 N, 123_x000E_30.50 E)	Jilin Province of Northeast China	China	Eastern Asia	Asia	No
Bos taurus	Cattle	Bovidae	Cetartiodactyla	Blackhall, M., Raffaele, E. & Veblen, T.T. (2012). Is foliar flammability of woody species related to time since fire and herbivory in northwest Patagonia, Argentina? Journal of Vegetation Science, 23, 931–941.	R_35	2012	We measured four foliar traits expected to affect flammability: leaf moisture, leaf size, specific leaf area and leaf strength, and conducted tests of ignitability (time to ignition and duration of combustion) on leaves of six common tall shrub and small tree species: non-palatable Lomatia hirsuta and Diostea juncea, moderately palatable Nothofagus antarctica and Schinus patagonicus and highly pa…	(10) Indirect impacts through interactions with other taxa	(10.2) -with other native taxa negatively affecting native taxa	Indirect	Lomatia hirsuta	Radal	Plantae	Primary producers	MN+ - Minor	Medium	The impact might be higher, but the study only focus on foliar traits so it is not possible to know what is happening at the population level.	It is unlikely lower because the changes observed are significant	Nahuel Huapi National Park	Patagonia	Argentina	South America	South America	No
Bos taurus	Cattle	Bovidae	Cetartiodactyla	Blackhall, M., Raffaele, E. & Veblen, T.T. (2012). Is foliar flammability of woody species related to time since fire and herbivory in northwest Patagonia, Argentina? Journal of Vegetation Science, 23, 931–941.	R_35	2012	We measured four foliar traits expected to affect flammability: leaf moisture, leaf size, specific leaf area and leaf strength, and conducted tests of ignitability (time to ignition and duration of combustion) on leaves of six common tall shrub and small tree species: non-palatable Lomatia hirsuta and Diostea juncea, moderately palatable Nothofagus antarctica and Schinus patagonicus and highly pa…	NA	NA	NA	Schinus patagonicus		Plantae	Primary producers	DD - Data deficient				Nahuel Huapi National Park	Patagonia	Argentina	South America	South America	No
Bos taurus	Cattle	Bovidae	Cetartiodactyla	Blackhall, M., Raffaele, E. & Veblen, T.T. (2012). Is foliar flammability of woody species related to time since fire and herbivory in northwest Patagonia, Argentina? Journal of Vegetation Science, 23, 931–941.	R_35	2012	We measured four foliar traits expected to affect flammability: leaf moisture, leaf size, specific leaf area and leaf strength, and conducted tests of ignitability (time to ignition and duration of combustion) on leaves of six common tall shrub and small tree species: non-palatable Lomatia hirsuta and Diostea juncea, moderately palatable Nothofagus antarctica and Schinus patagonicus and highly pa…	NA	NA	NA	Nothofagus antarctica	Antartic beech	Plantae	Primary producers	DD - Data deficient				Nahuel Huapi National Park	Patagonia	Argentina	South America	South America	No
Bos taurus	Cattle	Bovidae	Cetartiodactyla	Burton, E.C., Gray, M.J., Schmutzer, A.C. & Miller, D.L. (2009). Differential Responses of Postmetamorphic Amphibians to Cattle Grazing in Wetlands. The Journal of Wildlife Management, 73, 269–277.	R_50	2009	The impact might be higher, but the study did not allow to detect the effect of the alien on the native population size, only flowering and fruiting variations were measured, which does not allow to conclude on a population increase. [...] number of American toads (Bufo americanus) captured was 68 times and 76 times greater at cattle-access wetlands in 2005 and 2006, respectively. [...] Our resul…	NA	NA	NA	Bufo americanus	American toad	Animalia	Tertiary consumers	MO+ - Moderate	High	It is unlikely higher because the toad is also present without cattle	It is unlikely lower cause we observe an increase in the population	University of Tennessee Plateau Research and Education Center on the Cumberland Plateau in Crossville, Tennessee(36800050.6400 N, 85807056.3100 W)	Tennessee	United States	North America	North and Central America	No
Bos taurus	Cattle	Bovidae	Cetartiodactyla	de Paz, M. & Raffaele, E. (2013). Cattle change plant reproductive phenology, promoting community changes in a post-fire Nothofagus forest in northern Patagonia, Argentina. Journal of Plant Ecology, 6, 459–467.	R_80	2013	Flowering and fruiting variations may be influenced by herbivory, especially by large mammals. The aim of this study was to determine the effects of cattle browsing on the reproductive phenology of understory species in a subalpine post-fire Nothofagus forest in Patagonia.[...] Cattle significantly affected the number of flowers in the studied native woody species in different ways. [...] whereas…	NA	NA	NA	Berberis microphylla	Box-leaved barberry	Plantae	Primary producers	MN+ - Minor	Medium	The impact might be higher, but the study did not allow to detect the effect of the alien on the native population size, only flowering and fruiting variations were measured, which does not allow to conclude on a population increase.		Donat Hill (41°20′ S, 71°00′ W, 1250 m); Nahuel Huapi National Park	Patagonia	Argentina	South America	South America	No
Bos taurus	Cattle	Bovidae	Cetartiodactyla	de Paz, M. & Raffaele, E. (2013). Cattle change plant reproductive phenology, promoting community changes in a post-fire Nothofagus forest in northern Patagonia, Argentina. Journal of Plant Ecology, 6, 459–467.	R_80	2013	Flowering and fruiting variations may be influenced by herbivory, especially by large mammals. The aim of this study was to determine the effects of cattle browsing on the reproductive phenology of understory species in a subalpine post-fire Nothofagus forest in Patagonia.[...] Cattle significantly affected the number of flowers in the studied native woody species in different ways. [...] whereas…	NA	NA	NA	Berberis darwinii	Darwin's barberry	Plantae	Primary producers	MN+ - Minor	Medium	The impact might be higher but we only have results for the flowering period and not for other traits of the plants.		Donat Hill (41°20′ S, 71°00′ W, 1250 m); Nahuel Huapi National Park	Patagonia	Argentina	South America	South America	No
Boselaphus tragocamelus	Nilgai (antelope)	Bovidae	Cetartiodactyla	Imperio, S., Focardi, S., Santini, G. & Provenzale, A. (2012). Population dynamics in a guild of four Mediterranean ungulates: density-dependence, environmental effects and inter-specific interactions. Oikos, 121, 1613–1626.	R_149	2012	Here we studied the population dynamics of four wild ungulate species in the Castelporziano Preserve near Rome, Italy, as obtained from detailed bag counts from hunting drives during the period 1878–1986: the Italian roe deer Capreolus capreolus italicus, the Maremma wild boar Sus scrofa majori (both endemic to Italy), the native red deer Cervus elaphus, and the alien fallow deer Dama dama. We al…	(10) Indirect impacts through interactions with other taxa	(10.4) -with other native taxa positively affecting native taxa	Indirect	Capreolus capreolus italicus	Roe deer	Animalia	Herbivores	MO+ - Moderate	Medium		The impact might be lower, because the method used is modelisation so we don't have directly observed impacts	The Castelporziano Preserve	Southeast of Rome	Italy	Europe	Europe	No
Boselaphus tragocamelus	Nilgai (antelope)	Bovidae	Cetartiodactyla	Imperio, S., Focardi, S., Santini, G. & Provenzale, A. (2012). Population dynamics in a guild of four Mediterranean ungulates: density-dependence, environmental effects and inter-specific interactions. Oikos, 121, 1613–1626.	R_149	2012	Here we studied the population dynamics of four wild ungulate species in the Castelporziano Preserve near Rome, Italy, as obtained from detailed bag counts from hunting drives during the period 1878–1986: the Italian roe deer Capreolus capreolus italicus, the Maremma wild boar Sus scrofa majori (both endemic to Italy), the native red deer Cervus elaphus, and the alien fallow deer Dama dama. We al…	(10) Indirect impacts through interactions with other taxa	(10.4) -with other native taxa positively affecting native taxa	Indirect	Cervus elaphus	Red deer	Animalia	Herbivores	MO+ - Moderate	Medium		The impact might be lower, because the method used is modelisation so we don't have directly observed impacts	The Castelporziano Preserve	Southeast of Rome	Italy	Europe	Europe	No
Bubalus bubalis	Water buffalo	Bovidae	Cetartiodactyla	Petty, A.M., Werner, P.A., Lehmann, C.E.R., Riley, J.E., Banfai, D.S. & Elliott, L.P. (2007). Savanna Responses to Feral Buffalo in Kakadu National Park, Australia. Ecological Monographs, 77, 441–463.	R_224	2007	We synthesize the history and ecological impacts of the rapid expansion and eradication of an exotic large herbivore, the Asian water buffalo (Bubalus bubalus), on the mesic savannas of Kakadu National Park (KNP), a World Heritage Park located within the Alligator Rivers Region (ARR) of monsoonal north Australia. [...] We show evidence that the rapid population expansion and sudden removal of thi…	(10) Indirect impacts through interactions with other taxa	(10.2) -with other native taxa negatively affecting native taxa	Indirect	Woody species in woodland		Plantae	Primary producers	MN+ - Minor	Low	The impact might be higher, but the study did not allow to detect the effect of the alien on the native population size (only the mortality and the growth rates)	The impact might be lower due to confounding effects (e.g., precipitation, landform, vegetation type, history of buffalo harvest)	Kakadu National Park	Northern Territory	Australia	Oceania	Oceania	No
Bubalus bubalis	Water buffalo	Bovidae	Cetartiodactyla	Werner, P.A., Cowie, I.D. & Cusack, J.S. (2006). Juvenile tree growth and demography in response to feral water buffalo in savannas of northern Australia: an experimental field study in Kakadu National Park. Aust. J. Bot., 54, 283.	R_306	2006	The feral Asian water buffalo has been implicated as a factor in inhibiting the movement of juvenile trees to sapling stage. In a 6-year field study in Kakadu National Park, 656 juvenile plants were monitored for growth and survival, and in exploring the effects of buffalo, clipping surrounding vegetation and ambient fire. Buffalo were removed from one half of the sites across an environmental gr…	(2) Overcompensation	(2.4) -to grazing/herbivory/browsing	Direct	Juvenile trees	NA	Plantae	Primary producers	MN+ - Minor	Medium	The impact might be higher, but the study did not allow to detect the effect of the alien on the native population size	It is unlikely lower because of the difference in mean height which is significantly higher in areas with buffalo compared to buffalo-free ones	Kapalga National Park	Northern territory	Australia	Oceania	Oceania	No
Bubalus bubalis	Water buffalo	Bovidae	Cetartiodactyla	Bowman, D. M. J. S., Riley, J. E., Boggs, G. S., Lehmann, C. E. R. & Prior, L. D. Do feral buffalo (Bubalus bubalis) explain the increase of woody cover in savannas of Kakadu National Park, Australia? J. Biogeogr. 35, 1976–1988 (2008).	R_39	2008	Feral buffalo built up to high densities in the study area until c. 1985, after which a control programme almost eliminated the animals. From 1990, low densities of managed buffalo were maintained inside an enclosure. We compared trends in woody vegetation when buffalo were high-density feral, low-density managed or absent. [...] The effects of grazers on woody cover are indirect, and largely med…	NA		Indirect	Melaleuca spp.	Paperbarks	Plantae	Primary producers	ML+ - Minimal	Low	The alien might affect the performance of native individuals (no decline in the native population size was detected in the study, but the effect of the alien on the performance of native individuals was not investigated); in addition, there is a controversy with Petty et al. (2010) on the conclusions drawn in this study.		Kakadu National Park	Northern Territory	Australia	Oceania	Oceania	No
Bubalus bubalis	Water buffalo	Bovidae	Cetartiodactyla	Bowman, D. M. J. S., Riley, J. E., Boggs, G. S., Lehmann, C. E. R. & Prior, L. D. Do feral buffalo (Bubalus bubalis) explain the increase of woody cover in savannas of Kakadu National Park, Australia? J. Biogeogr. 35, 1976–1988 (2008).	R_39	2008	Feral buffalo built up to high densities in the study area until c. 1985, after which a control programme almost eliminated the animals. From 1990, low densities of managed buffalo were maintained inside an enclosure. We compared trends in woody vegetation when buffalo were high-density feral, low-density managed or absent. [...] The effects of grazers on woody cover are indirect, and largely med…	NA		Indirect	Eucalyptus spp.	Eucalyptus	Plantae	Primary producers	ML+ - Minimal	Low	The alien might affect the performance of native individuals (no decline in the native population size was detected in the study, but the effect of the alien on the performance of native individuals was not investigated); in addition, there is a controversy with Petty et al. (2010) on the conclusions drawn in this study.		Kakadu National Park	Northern Territory	Australia	Oceania	Oceania	No
Bubalus bubalis	Water buffalo	Bovidae	Cetartiodactyla	Braithwaite, R.W., Dudzinski, M.L., Ridpath, M.G. & Parker, B.S. (1984). The impact of water buffalo on the monsoon forest ecosystem in Kakadu National Park. Austral Ecol, 9, 309–322.	R_44	1984	Twenty-seven sites were selected randomly within a three-way stratification of Stages I and II of Kakadu National Park (approximately 12 700 km-). [...] A further three sites in the escarpment country were selected to ni;tkc a total ol 30 sites. [...] The 30 sites were visited in August-November (dry season) and January-April (wet season) in 1980-1 and 1981-2. During each site visit of 48 h. the …	Chemical, physical or structural impact on ecosystems		Indirect	Ptilinopus regina	Rose-crowned fruit dove	Animalia	Secondary consumers	ML+ - Minimal	Low	The alien might affect the performance of native individuals (no increase neither decline in the native population size was detected in the study, but the effect of the alien on the performance of native individuals was not investigated).		Kakadu National Park	Northern Territory	Australia	Oceania	Oceania	No
Bubalus bubalis	Water buffalo	Bovidae	Cetartiodactyla	Braithwaite, R.W., Dudzinski, M.L., Ridpath, M.G. & Parker, B.S. (1984). The impact of water buffalo on the monsoon forest ecosystem in Kakadu National Park. Austral Ecol, 9, 309–322.	R_44	1984	Twenty-seven sites were selected randomly within a three-way stratification of Stages I and II of Kakadu National Park (approximately 12 700 km-). [...] A further three sites in the escarpment country were selected to ni;tkc a total ol 30 sites. [...] The 30 sites were visited in August-November (dry season) and January-April (wet season) in 1980-1 and 1981-2. During each site visit of 48 h. the …	Chemical, physical or structural impact on ecosystems		Indirect	Geopelia humeralis	Bar-shouldered dove	Animalia	Secondary consumers	ML+ - Minimal	Low	The alien might affect the performance of native individuals (no increase neither decline in the native population size was detected in the study, but the effect of the alien on the performance of native individuals was not investigated).		Kakadu National Park	Northern Territory	Australia	Oceania	Oceania	No
Bubalus bubalis	Water buffalo	Bovidae	Cetartiodactyla	Braithwaite, R.W., Dudzinski, M.L., Ridpath, M.G. & Parker, B.S. (1984). The impact of water buffalo on the monsoon forest ecosystem in Kakadu National Park. Austral Ecol, 9, 309–322.	R_44	1984	Twenty-seven sites were selected randomly within a three-way stratification of Stages I and II of Kakadu National Park (approximately 12 700 km-). [...] A further three sites in the escarpment country were selected to ni;tkc a total ol 30 sites. [...] The 30 sites were visited in August-November (dry season) and January-April (wet season) in 1980-1 and 1981-2. During each site visit of 48 h. the …	Chemical, physical or structural impact on ecosystems		Indirect	Cacomantis variolosus	Brush cuckoo	Animalia	Secondary consumers	ML+ - Minimal	Low	The alien might affect the performance of native individuals (no increase neither decline in the native population size was detected in the study, but the effect of the alien on the performance of native individuals was not investigated).		Kakadu National Park	Northern Territory	Australia	Oceania	Oceania	No
Bubalus bubalis	Water buffalo	Bovidae	Cetartiodactyla	Braithwaite, R.W., Dudzinski, M.L., Ridpath, M.G. & Parker, B.S. (1984). The impact of water buffalo on the monsoon forest ecosystem in Kakadu National Park. Austral Ecol, 9, 309–322.	R_44	1984	Twenty-seven sites were selected randomly within a three-way stratification of Stages I and II of Kakadu National Park (approximately 12 700 km-). [...] A further three sites in the escarpment country were selected to ni;tkc a total ol 30 sites. [...] The 30 sites were visited in August-November (dry season) and January-April (wet season) in 1980-1 and 1981-2. During each site visit of 48 h. the …	Chemical, physical or structural impact on ecosystems		Indirect	Chrysococcyx minutillus	Little bronze cuckoo	Animalia	Secondary consumers	ML+ - Minimal	Low	The alien might affect the performance of native individuals (no increase neither decline in the native population size was detected in the study, but the effect of the alien on the performance of native individuals was not investigated).		Kakadu National Park	Northern Territory	Australia	Oceania	Oceania	No
Bubalus bubalis	Water buffalo	Bovidae	Cetartiodactyla	Braithwaite, R.W., Dudzinski, M.L., Ridpath, M.G. & Parker, B.S. (1984). The impact of water buffalo on the monsoon forest ecosystem in Kakadu National Park. Austral Ecol, 9, 309–322.	R_44	1984	Twenty-seven sites were selected randomly within a three-way stratification of Stages I and II of Kakadu National Park (approximately 12 700 km-). [...] A further three sites in the escarpment country were selected to ni;tkc a total ol 30 sites. [...] The 30 sites were visited in August-November (dry season) and January-April (wet season) in 1980-1 and 1981-2. During each site visit of 48 h. the …	Chemical, physical or structural impact on ecosystems		Indirect	Ceyx azureus	Azure kingfisher	Animalia	Secondary consumers	ML+ - Minimal	Low	The alien might affect the performance of native individuals (no increase neither decline in the native population size was detected in the study, but the effect of the alien on the performance of native individuals was not investigated).		Kakadu National Park	Northern Territory	Australia	Oceania	Oceania	No
Bubalus bubalis	Water buffalo	Bovidae	Cetartiodactyla	Braithwaite, R.W., Dudzinski, M.L., Ridpath, M.G. & Parker, B.S. (1984). The impact of water buffalo on the monsoon forest ecosystem in Kakadu National Park. Austral Ecol, 9, 309–322.	R_44	1984	Twenty-seven sites were selected randomly within a three-way stratification of Stages I and II of Kakadu National Park (approximately 12 700 km-). [...] A further three sites in the escarpment country were selected to ni;tkc a total ol 30 sites. [...] The 30 sites were visited in August-November (dry season) and January-April (wet season) in 1980-1 and 1981-2. During each site visit of 48 h. the …	Chemical, physical or structural impact on ecosystems		Indirect	Todiramphus sanctus	Sacred kingfisher	Animalia	Secondary consumers	ML+ - Minimal	Low	The alien might affect the performance of native individuals (no increase neither decline in the native population size was detected in the study, but the effect of the alien on the performance of native individuals was not investigated).		Kakadu National Park	Northern Territory	Australia	Oceania	Oceania	No
Bubalus bubalis	Water buffalo	Bovidae	Cetartiodactyla	Braithwaite, R.W., Dudzinski, M.L., Ridpath, M.G. & Parker, B.S. (1984). The impact of water buffalo on the monsoon forest ecosystem in Kakadu National Park. Austral Ecol, 9, 309–322.	R_44	1984	Twenty-seven sites were selected randomly within a three-way stratification of Stages I and II of Kakadu National Park (approximately 12 700 km-). [...] A further three sites in the escarpment country were selected to ni;tkc a total ol 30 sites. [...] The 30 sites were visited in August-November (dry season) and January-April (wet season) in 1980-1 and 1981-2. During each site visit of 48 h. the …	Chemical, physical or structural impact on ecosystems		Indirect	Eurystomus orientalis	Oreiental dollarbird	Animalia	Secondary consumers	ML+ - Minimal	Low	The alien might affect the performance of native individuals (no increase neither decline in the native population size was detected in the study, but the effect of the alien on the performance of native individuals was not investigated).		Kakadu National Park	Northern Territory	Australia	Oceania	Oceania	No
Bubalus bubalis	Water buffalo	Bovidae	Cetartiodactyla	Braithwaite, R.W., Dudzinski, M.L., Ridpath, M.G. & Parker, B.S. (1984). The impact of water buffalo on the monsoon forest ecosystem in Kakadu National Park. Austral Ecol, 9, 309–322.	R_44	1984	Twenty-seven sites were selected randomly within a three-way stratification of Stages I and II of Kakadu National Park (approximately 12 700 km-). [...] A further three sites in the escarpment country were selected to ni;tkc a total ol 30 sites. [...] The 30 sites were visited in August-November (dry season) and January-April (wet season) in 1980-1 and 1981-2. During each site visit of 48 h. the …	Chemical, physical or structural impact on ecosystems		Indirect	Coracina papuensis	White-bellied cuckooshrike	Animalia	Secondary consumers	ML+ - Minimal	Low	The alien might affect the performance of native individuals (no increase neither decline in the native population size was detected in the study, but the effect of the alien on the performance of native individuals was not investigated).		Kakadu National Park	Northern Territory	Australia	Oceania	Oceania	No
Bubalus bubalis	Water buffalo	Bovidae	Cetartiodactyla	Braithwaite, R.W., Dudzinski, M.L., Ridpath, M.G. & Parker, B.S. (1984). The impact of water buffalo on the monsoon forest ecosystem in Kakadu National Park. Austral Ecol, 9, 309–322.	R_44	1984	Twenty-seven sites were selected randomly within a three-way stratification of Stages I and II of Kakadu National Park (approximately 12 700 km-). [...] A further three sites in the escarpment country were selected to ni;tkc a total ol 30 sites. [...] The 30 sites were visited in August-November (dry season) and January-April (wet season) in 1980-1 and 1981-2. During each site visit of 48 h. the …	Chemical, physical or structural impact on ecosystems		Indirect	Lalage leucomela	Varied triller	Animalia	Secondary consumers	ML+ - Minimal	Low	The alien might affect the performance of native individuals (no increase neither decline in the native population size was detected in the study, but the effect of the alien on the performance of native individuals was not investigated).		Kakadu National Park	Northern Territory	Australia	Oceania	Oceania	No
Bubalus bubalis	Water buffalo	Bovidae	Cetartiodactyla	Braithwaite, R.W., Dudzinski, M.L., Ridpath, M.G. & Parker, B.S. (1984). The impact of water buffalo on the monsoon forest ecosystem in Kakadu National Park. Austral Ecol, 9, 309–322.	R_44	1984	Twenty-seven sites were selected randomly within a three-way stratification of Stages I and II of Kakadu National Park (approximately 12 700 km-). [...] A further three sites in the escarpment country were selected to ni;tkc a total ol 30 sites. [...] The 30 sites were visited in August-November (dry season) and January-April (wet season) in 1980-1 and 1981-2. During each site visit of 48 h. the …	Chemical, physical or structural impact on ecosystems		Indirect	Pachycephala rufiventris	Rufous whistler	Animalia	Secondary consumers	ML+ - Minimal	Low	The alien might affect the performance of native individuals (no increase neither decline in the native population size was detected in the study, but the effect of the alien on the performance of native individuals was not investigated).		Kakadu National Park	Northern Territory	Australia	Oceania	Oceania	No
Bubalus bubalis	Water buffalo	Bovidae	Cetartiodactyla	Braithwaite, R.W., Dudzinski, M.L., Ridpath, M.G. & Parker, B.S. (1984). The impact of water buffalo on the monsoon forest ecosystem in Kakadu National Park. Austral Ecol, 9, 309–322.	R_44	1984	Twenty-seven sites were selected randomly within a three-way stratification of Stages I and II of Kakadu National Park (approximately 12 700 km-). [...] A further three sites in the escarpment country were selected to ni;tkc a total ol 30 sites. [...] The 30 sites were visited in August-November (dry season) and January-April (wet season) in 1980-1 and 1981-2. During each site visit of 48 h. the …	Chemical, physical or structural impact on ecosystems		Indirect	Colluricincla megarhyncha	Arafura shrikethrush	Animalia	Secondary consumers	ML+ - Minimal	Low	The alien might affect the performance of native individuals (no increase neither decline in the native population size was detected in the study, but the effect of the alien on the performance of native individuals was not investigated).		Kakadu National Park	Northern Territory	Australia	Oceania	Oceania	No
Bubalus bubalis	Water buffalo	Bovidae	Cetartiodactyla	Braithwaite, R.W., Dudzinski, M.L., Ridpath, M.G. & Parker, B.S. (1984). The impact of water buffalo on the monsoon forest ecosystem in Kakadu National Park. Austral Ecol, 9, 309–322.	R_44	1984	Twenty-seven sites were selected randomly within a three-way stratification of Stages I and II of Kakadu National Park (approximately 12 700 km-). [...] A further three sites in the escarpment country were selected to ni;tkc a total ol 30 sites. [...] The 30 sites were visited in August-November (dry season) and January-April (wet season) in 1980-1 and 1981-2. During each site visit of 48 h. the …	Chemical, physical or structural impact on ecosystems		Indirect	Myzomela obscura	Dusky myzomela	Animalia	Secondary consumers	ML+ - Minimal	Low	The alien might affect the performance of native individuals (no increase neither decline in the native population size was detected in the study, but the effect of the alien on the performance of native individuals was not investigated).		Kakadu National Park	Northern Territory	Australia	Oceania	Oceania	No
Bubalus bubalis	Water buffalo	Bovidae	Cetartiodactyla	Braithwaite, R.W., Dudzinski, M.L., Ridpath, M.G. & Parker, B.S. (1984). The impact of water buffalo on the monsoon forest ecosystem in Kakadu National Park. Austral Ecol, 9, 309–322.	R_44	1984	Twenty-seven sites were selected randomly within a three-way stratification of Stages I and II of Kakadu National Park (approximately 12 700 km-). [...] A further three sites in the escarpment country were selected to ni;tkc a total ol 30 sites. [...] The 30 sites were visited in August-November (dry season) and January-April (wet season) in 1980-1 and 1981-2. During each site visit of 48 h. the …	Chemical, physical or structural impact on ecosystems		Indirect	Icterus nigrogularis	Yellow oriole	Animalia	Secondary consumers	ML+ - Minimal	Low	The alien might affect the performance of native individuals (no increase neither decline in the native population size was detected in the study, but the effect of the alien on the performance of native individuals was not investigated).		Kakadu National Park	Northern Territory	Australia	Oceania	Oceania	No
Bubalus bubalis	Water buffalo	Bovidae	Cetartiodactyla	Braithwaite, R.W., Dudzinski, M.L., Ridpath, M.G. & Parker, B.S. (1984). The impact of water buffalo on the monsoon forest ecosystem in Kakadu National Park. Austral Ecol, 9, 309–322.	R_44	1984	Twenty-seven sites were selected randomly within a three-way stratification of Stages I and II of Kakadu National Park (approximately 12 700 km-). [...] A further three sites in the escarpment country were selected to ni;tkc a total ol 30 sites. [...] The 30 sites were visited in August-November (dry season) and January-April (wet season) in 1980-1 and 1981-2. During each site visit of 48 h. the …	Chemical, physical or structural impact on ecosystems		Indirect	Isoodon macrourus	Nothern brown bandicoot	Animalia	Secondary consumers	ML+ - Minimal	Low	The alien might affect the performance of native individuals (no increase neither decline in the native population size was detected in the study, but the effect of the alien on the performance of native individuals was not investigated).		Kakadu National Park	Northern Territory	Australia	Oceania	Oceania	No
Bubalus bubalis	Water buffalo	Bovidae	Cetartiodactyla	Braithwaite, R.W., Dudzinski, M.L., Ridpath, M.G. & Parker, B.S. (1984). The impact of water buffalo on the monsoon forest ecosystem in Kakadu National Park. Austral Ecol, 9, 309–322.	R_44	1984	Twenty-seven sites were selected randomly within a three-way stratification of Stages I and II of Kakadu National Park (approximately 12 700 km-). [...] A further three sites in the escarpment country were selected to ni;tkc a total ol 30 sites. [...] The 30 sites were visited in August-November (dry season) and January-April (wet season) in 1980-1 and 1981-2. During each site visit of 48 h. the …	Chemical, physical or structural impact on ecosystems		Indirect	Pteropus scapulatus	Little red flying-fox	Animalia	Herbivores	ML+ - Minimal	Low	The alien might affect the performance of native individuals (no increase neither decline in the native population size was detected in the study, but the effect of the alien on the performance of native individuals was not investigated).		Kakadu National Park	Northern Territory	Australia	Oceania	Oceania	No
Bubalus bubalis	Water buffalo	Bovidae	Cetartiodactyla	Braithwaite, R.W., Dudzinski, M.L., Ridpath, M.G. & Parker, B.S. (1984). The impact of water buffalo on the monsoon forest ecosystem in Kakadu National Park. Austral Ecol, 9, 309–322.	R_44	1984	Twenty-seven sites were selected randomly within a three-way stratification of Stages I and II of Kakadu National Park (approximately 12 700 km-). [...] A further three sites in the escarpment country were selected to ni;tkc a total ol 30 sites. [...] The 30 sites were visited in August-November (dry season) and January-April (wet season) in 1980-1 and 1981-2. During each site visit of 48 h. the …	Chemical, physical or structural impact on ecosystems		Indirect	Pteropus atecto	Black flying fox	Animalia	Herbivores	ML+ - Minimal	Low	The alien might affect the performance of native individuals (no increase neither decline in the native population size was detected in the study, but the effect of the alien on the performance of native individuals was not investigated).		Kakadu National Park	Northern Territory	Australia	Oceania	Oceania	No
Bubalus bubalis	Water buffalo	Bovidae	Cetartiodactyla	Braithwaite, R.W., Dudzinski, M.L., Ridpath, M.G. & Parker, B.S. (1984). The impact of water buffalo on the monsoon forest ecosystem in Kakadu National Park. Austral Ecol, 9, 309–322.	R_44	1984	Twenty-seven sites were selected randomly within a three-way stratification of Stages I and II of Kakadu National Park (approximately 12 700 km-). [...] A further three sites in the escarpment country were selected to ni;tkc a total ol 30 sites. [...] The 30 sites were visited in August-November (dry season) and January-April (wet season) in 1980-1 and 1981-2. During each site visit of 48 h. the …	Chemical, physical or structural impact on ecosystems		Indirect	Bos taurus	Cattle	Animalia	Herbivores	ML+ - Minimal	Low	The alien might affect the performance of native individuals (no increase neither decline in the native population size was detected in the study, but the effect of the alien on the performance of native individuals was not investigated).		Kakadu National Park	Northern Territory	Australia	Oceania	Oceania	No
Bubalus bubalis	Water buffalo	Bovidae	Cetartiodactyla	Braithwaite, R.W., Dudzinski, M.L., Ridpath, M.G. & Parker, B.S. (1984). The impact of water buffalo on the monsoon forest ecosystem in Kakadu National Park. Austral Ecol, 9, 309–322.	R_44	1984	Twenty-seven sites were selected randomly within a three-way stratification of Stages I and II of Kakadu National Park (approximately 12 700 km-). [...] A further three sites in the escarpment country were selected to ni;tkc a total ol 30 sites. [...] The 30 sites were visited in August-November (dry season) and January-April (wet season) in 1980-1 and 1981-2. During each site visit of 48 h. the …	Chemical, physical or structural impact on ecosystems		Indirect	Ctenotus essingtonii	Essington's ctenotus	Animalia	Secondary consumers	ML+ - Minimal	Low	The alien might affect the performance of native individuals (no increase neither decline in the native population size was detected in the study, but the effect of the alien on the performance of native individuals was not investigated).		Kakadu National Park	Northern Territory	Australia	Oceania	Oceania	No
Bubalus bubalis	Water buffalo	Bovidae	Cetartiodactyla	Braithwaite, R.W., Dudzinski, M.L., Ridpath, M.G. & Parker, B.S. (1984). The impact of water buffalo on the monsoon forest ecosystem in Kakadu National Park. Austral Ecol, 9, 309–322.	R_44	1984	Twenty-seven sites were selected randomly within a three-way stratification of Stages I and II of Kakadu National Park (approximately 12 700 km-). [...] A further three sites in the escarpment country were selected to ni;tkc a total ol 30 sites. [...] The 30 sites were visited in August-November (dry season) and January-April (wet season) in 1980-1 and 1981-2. During each site visit of 48 h. the …	Chemical, physical or structural impact on ecosystems		Indirect	Varanus gouldii	Sand goanna	Animalia	Secondary consumers	ML+ - Minimal	Low	The alien might affect the performance of native individuals (no increase neither decline in the native population size was detected in the study, but the effect of the alien on the performance of native individuals was not investigated).		Kakadu National Park	Northern Territory	Australia	Oceania	Oceania	No
Bubalus bubalis	Water buffalo	Bovidae	Cetartiodactyla	Braithwaite, R.W., Dudzinski, M.L., Ridpath, M.G. & Parker, B.S. (1984). The impact of water buffalo on the monsoon forest ecosystem in Kakadu National Park. Austral Ecol, 9, 309–322.	R_44	1984	Twenty-seven sites were selected randomly within a three-way stratification of Stages I and II of Kakadu National Park (approximately 12 700 km-). [...] A further three sites in the escarpment country were selected to ni;tkc a total ol 30 sites. [...] The 30 sites were visited in August-November (dry season) and January-April (wet season) in 1980-1 and 1981-2. During each site visit of 48 h. the …	Chemical, physical or structural impact on ecosystems		Indirect	Varanus panoptes	Yellow-spotted monitor	Animalia	Secondary consumers	ML+ - Minimal	Low	The alien might affect the performance of native individuals (no increase neither decline in the native population size was detected in the study, but the effect of the alien on the performance of native individuals was not investigated).		Kakadu National Park	Northern Territory	Australia	Oceania	Oceania	No
Bubalus bubalis	Water buffalo	Bovidae	Cetartiodactyla	Braithwaite, R.W., Dudzinski, M.L., Ridpath, M.G. & Parker, B.S. (1984). The impact of water buffalo on the monsoon forest ecosystem in Kakadu National Park. Austral Ecol, 9, 309–322.	R_44	1984	Twenty-seven sites were selected randomly within a three-way stratification of Stages I and II of Kakadu National Park (approximately 12 700 km-). [...] A further three sites in the escarpment country were selected to ni;tkc a total ol 30 sites. [...] The 30 sites were visited in August-November (dry season) and January-April (wet season) in 1980-1 and 1981-2. During each site visit of 48 h. the …	Chemical, physical or structural impact on ecosystems		Indirect	Sphenomorphus crassicaudus	Lizard species	Animalia	Secondary consumers	ML+ - Minimal	Low	The alien might affect the performance of native individuals (no increase neither decline in the native population size was detected in the study, but the effect of the alien on the performance of native individuals was not investigated).		Kakadu National Park	Northern Territory	Australia	Oceania	Oceania	No
Bubalus bubalis	Water buffalo	Bovidae	Cetartiodactyla	Braithwaite, R.W., Dudzinski, M.L., Ridpath, M.G. & Parker, B.S. (1984). The impact of water buffalo on the monsoon forest ecosystem in Kakadu National Park. Austral Ecol, 9, 309–322.	R_44	1984	Twenty-seven sites were selected randomly within a three-way stratification of Stages I and II of Kakadu National Park (approximately 12 700 km-). [...] A further three sites in the escarpment country were selected to ni;tkc a total ol 30 sites. [...] The 30 sites were visited in August-November (dry season) and January-April (wet season) in 1980-1 and 1981-2. During each site visit of 48 h. the …	Chemical, physical or structural impact on ecosystems		Indirect	Limnodynastes convexiusculus	Marble frog	Animalia	Secondary consumers	ML+ - Minimal	Low	The alien might affect the performance of native individuals (no increase neither decline in the native population size was detected in the study, but the effect of the alien on the performance of native individuals was not investigated).		Kakadu National Park	Northern Territory	Australia	Oceania	Oceania	No
Bubalus bubalis	Water buffalo	Bovidae	Cetartiodactyla	Braithwaite, R.W., Dudzinski, M.L., Ridpath, M.G. & Parker, B.S. (1984). The impact of water buffalo on the monsoon forest ecosystem in Kakadu National Park. Austral Ecol, 9, 309–322.	R_44	1984	Twenty-seven sites were selected randomly within a three-way stratification of Stages I and II of Kakadu National Park (approximately 12 700 km-). [...] A further three sites in the escarpment country were selected to ni;tkc a total ol 30 sites. [...] The 30 sites were visited in August-November (dry season) and January-April (wet season) in 1980-1 and 1981-2. During each site visit of 48 h. the …	Chemical, physical or structural impact on ecosystems		Indirect	Liioria caerulea	Australian green tree frog	Animalia	Secondary consumers	ML+ - Minimal	Low	The alien might affect the performance of native individuals (no increase neither decline in the native population size was detected in the study, but the effect of the alien on the performance of native individuals was not investigated).		Kakadu National Park	Northern Territory	Australia	Oceania	Oceania	No
[truncated: 404 more rows]

## Sheet: EICAT assessment data
scientific name	Family	Order	Report describing the impact observation (two (or more) references are given when studies are complementary and have been combined into one impact observation)	Report_ID	Year of the report	Quotation from the report: rationale for the assigned magnitude (two (or more) quotations are given when studies are complementary and have been combined into one impact observation)	Impact mechanism(s)	Mechanism type(s) (direct vs indirect)	Impacted native species scientific name	Impacted kindgom(s)	Impacted trophic level	EICAT impact magnitude	Confidence score	Rationale for confidence score: Likelihood of the impact to be higher	Rationale of the confidence score: Likelihood of the impact to be lower	Precise location(s) of impact (island, national Park, wood, etc. given in the report)	Region of impact (district, County, State, Provincia, Archipelago, Departments, etc. of the precise location of impact)	Country of impact	Subcontinent	Continent	Island
[truncated: 1,648 more rows]
